# Supplementary material for: A single mini-barcode test to screen for Australian mammalian predators from environmental samples
Source: PubMed Central journal article supplement (PMC5545080; doi:10.1093/gigascience/gix052), 2017-07-04

# GigaScience

## Mini-barcode for species identification

--Manuscript Draft--

|                                                                               |                                                                                                                                                                                                                                                                                                                                                                                                                                                                                                                                                                                                                                                                                                                                                                                                                                                                                                                                                                                                                                                                                                                                                                                                                                                                                                                                                                                                                                                                                                                                                                                                                                                                    |                    |
|-------------------------------------------------------------------------------|--------------------------------------------------------------------------------------------------------------------------------------------------------------------------------------------------------------------------------------------------------------------------------------------------------------------------------------------------------------------------------------------------------------------------------------------------------------------------------------------------------------------------------------------------------------------------------------------------------------------------------------------------------------------------------------------------------------------------------------------------------------------------------------------------------------------------------------------------------------------------------------------------------------------------------------------------------------------------------------------------------------------------------------------------------------------------------------------------------------------------------------------------------------------------------------------------------------------------------------------------------------------------------------------------------------------------------------------------------------------------------------------------------------------------------------------------------------------------------------------------------------------------------------------------------------------------------------------------------------------------------------------------------------------|--------------------|
| <b>Manuscript Number:</b>                                                     | GIGA-D-17-00051                                                                                                                                                                                                                                                                                                                                                                                                                                                                                                                                                                                                                                                                                                                                                                                                                                                                                                                                                                                                                                                                                                                                                                                                                                                                                                                                                                                                                                                                                                                                                                                                                                                    |                    |
| <b>Full Title:</b>                                                            | Mini-barcode for species identification                                                                                                                                                                                                                                                                                                                                                                                                                                                                                                                                                                                                                                                                                                                                                                                                                                                                                                                                                                                                                                                                                                                                                                                                                                                                                                                                                                                                                                                                                                                                                                                                                            |                    |
| <b>Article Type:</b>                                                          | Research                                                                                                                                                                                                                                                                                                                                                                                                                                                                                                                                                                                                                                                                                                                                                                                                                                                                                                                                                                                                                                                                                                                                                                                                                                                                                                                                                                                                                                                                                                                                                                                                                                                           |                    |
| <b>Funding Information:</b>                                                   | Invasive Animals Cooperative Research Centre<br>(Project 1.L.21)                                                                                                                                                                                                                                                                                                                                                                                                                                                                                                                                                                                                                                                                                                                                                                                                                                                                                                                                                                                                                                                                                                                                                                                                                                                                                                                                                                                                                                                                                                                                                                                                   | Miss Elodie Modave |
| <b>Abstract:</b>                                                              | <p>Background: Identification of species from trace samples is now possible through the comparison of diagnostic DNA fragments against reference DNA sequence databases. DNA detection of animals from non-invasive samples, such as predator faeces (scats) that contain traces of DNA from their species of origin, has proved to be a valuable tool for management of elusive wildlife. However, application of this approach can be limited by the availability of appropriate genetic markers. Scat DNA is often degraded, meaning that longer DNA sequences, including standard DNA barcoding markers, are difficult to recover. Instead, targeted short diagnostic markers are required to serve as diagnostic mini-barcodes. The mitochondrial genome is a useful source of such trace DNA markers, because it provides good resolution at species level and occurs in high copy numbers per cell.</p> <p>Results: We developed a mini-barcode, based on a short (178 bp) fragment of the conserved 12S rRNA mitochondrial gene sequence, with the goal of discriminating amongst the scats of large mammalian predators of Australia. We tested the sensitivity and specificity of our primers and can accurately detect and discriminate amongst quolls, cats, dogs, foxes and devils from trace DNA samples.</p> <p>Conclusions: Our approach provides a cost effective, time efficient and non-invasive tool that enables identification of all eight medium-large mammal predators in Australia, including native and introduced species, using a single test. With modification, this approach is likely to be of broad applicability elsewhere.</p> |                    |
| <b>Corresponding Author:</b>                                                  | Elodie Modave<br>University of Canberra<br>AUSTRALIA                                                                                                                                                                                                                                                                                                                                                                                                                                                                                                                                                                                                                                                                                                                                                                                                                                                                                                                                                                                                                                                                                                                                                                                                                                                                                                                                                                                                                                                                                                                                                                                                               |                    |
| <b>Corresponding Author Secondary Information:</b>                            |                                                                                                                                                                                                                                                                                                                                                                                                                                                                                                                                                                                                                                                                                                                                                                                                                                                                                                                                                                                                                                                                                                                                                                                                                                                                                                                                                                                                                                                                                                                                                                                                                                                                    |                    |
| <b>Corresponding Author's Institution:</b>                                    | University of Canberra                                                                                                                                                                                                                                                                                                                                                                                                                                                                                                                                                                                                                                                                                                                                                                                                                                                                                                                                                                                                                                                                                                                                                                                                                                                                                                                                                                                                                                                                                                                                                                                                                                             |                    |
| <b>Corresponding Author's Secondary Institution:</b>                          |                                                                                                                                                                                                                                                                                                                                                                                                                                                                                                                                                                                                                                                                                                                                                                                                                                                                                                                                                                                                                                                                                                                                                                                                                                                                                                                                                                                                                                                                                                                                                                                                                                                                    |                    |
| <b>First Author:</b>                                                          | Elodie Modave                                                                                                                                                                                                                                                                                                                                                                                                                                                                                                                                                                                                                                                                                                                                                                                                                                                                                                                                                                                                                                                                                                                                                                                                                                                                                                                                                                                                                                                                                                                                                                                                                                                      |                    |
| <b>First Author Secondary Information:</b>                                    |                                                                                                                                                                                                                                                                                                                                                                                                                                                                                                                                                                                                                                                                                                                                                                                                                                                                                                                                                                                                                                                                                                                                                                                                                                                                                                                                                                                                                                                                                                                                                                                                                                                                    |                    |
| <b>Order of Authors:</b>                                                      | Elodie Modave                                                                                                                                                                                                                                                                                                                                                                                                                                                                                                                                                                                                                                                                                                                                                                                                                                                                                                                                                                                                                                                                                                                                                                                                                                                                                                                                                                                                                                                                                                                                                                                                                                                      |                    |
|                                                                               | Anna Jane MacDonald, BSc, PhD                                                                                                                                                                                                                                                                                                                                                                                                                                                                                                                                                                                                                                                                                                                                                                                                                                                                                                                                                                                                                                                                                                                                                                                                                                                                                                                                                                                                                                                                                                                                                                                                                                      |                    |
|                                                                               | Stephen Donald Sarre, BAppSc, MAppSc, PhD                                                                                                                                                                                                                                                                                                                                                                                                                                                                                                                                                                                                                                                                                                                                                                                                                                                                                                                                                                                                                                                                                                                                                                                                                                                                                                                                                                                                                                                                                                                                                                                                                          |                    |
| <b>Order of Authors Secondary Information:</b>                                |                                                                                                                                                                                                                                                                                                                                                                                                                                                                                                                                                                                                                                                                                                                                                                                                                                                                                                                                                                                                                                                                                                                                                                                                                                                                                                                                                                                                                                                                                                                                                                                                                                                                    |                    |
| <b>Opposed Reviewers:</b>                                                     |                                                                                                                                                                                                                                                                                                                                                                                                                                                                                                                                                                                                                                                                                                                                                                                                                                                                                                                                                                                                                                                                                                                                                                                                                                                                                                                                                                                                                                                                                                                                                                                                                                                                    |                    |
| <b>Additional Information:</b>                                                |                                                                                                                                                                                                                                                                                                                                                                                                                                                                                                                                                                                                                                                                                                                                                                                                                                                                                                                                                                                                                                                                                                                                                                                                                                                                                                                                                                                                                                                                                                                                                                                                                                                                    |                    |
| <b>Question</b>                                                               | <b>Response</b>                                                                                                                                                                                                                                                                                                                                                                                                                                                                                                                                                                                                                                                                                                                                                                                                                                                                                                                                                                                                                                                                                                                                                                                                                                                                                                                                                                                                                                                                                                                                                                                                                                                    |                    |
| Are you submitting this manuscript to a special series or article collection? | No                                                                                                                                                                                                                                                                                                                                                                                                                                                                                                                                                                                                                                                                                                                                                                                                                                                                                                                                                                                                                                                                                                                                                                                                                                                                                                                                                                                                                                                                                                                                                                                                                                                                 |                    |
| <b>Experimental design and statistics</b>                                     | Yes                                                                                                                                                                                                                                                                                                                                                                                                                                                                                                                                                                                                                                                                                                                                                                                                                                                                                                                                                                                                                                                                                                                                                                                                                                                                                                                                                                                                                                                                                                                                                                                                                                                                |                    |

|                                                                                                                                                                                                                                                                                                                                                                                                                                                                                                                                                         |            |
|---------------------------------------------------------------------------------------------------------------------------------------------------------------------------------------------------------------------------------------------------------------------------------------------------------------------------------------------------------------------------------------------------------------------------------------------------------------------------------------------------------------------------------------------------------|------------|
| <p>Full details of the experimental design and statistical methods used should be given in the Methods section, as detailed in our <a href="#">Minimum Standards Reporting Checklist</a>. Information essential to interpreting the data presented should be made available in the figure legends.</p> <p>Have you included all the information requested in your manuscript?</p>                                                                                                                                                                       |            |
| <p><b>Resources</b></p> <p>A description of all resources used, including antibodies, cell lines, animals and software tools, with enough information to allow them to be uniquely identified, should be included in the Methods section. Authors are strongly encouraged to cite <a href="#">Research Resource Identifiers</a> (RRIDs) for antibodies, model organisms and tools, where possible.</p> <p>Have you included the information requested as detailed in our <a href="#">Minimum Standards Reporting Checklist</a>?</p>                     | <p>Yes</p> |
| <p><b>Availability of data and materials</b></p> <p>All datasets and code on which the conclusions of the paper rely must be either included in your submission or deposited in <a href="#">publicly available repositories</a> (where available and ethically appropriate), referencing such data using a unique identifier in the references and in the “Availability of Data and Materials” section of your manuscript.</p> <p>Have you have met the above requirement as detailed in our <a href="#">Minimum Standards Reporting Checklist</a>?</p> | <p>Yes</p> |

1 For submission to GigaScience

2 **Title:**

3 A single mini-barcode test to screen for Australian mammalian predators from  
4 environmental samples

5 **Authors:**

6 Elodie Modave<sup>1</sup>, Anna J MacDonald<sup>1</sup> and Stephen D Sarre<sup>1</sup>

7 **Address:**

8 <sup>1</sup> Institute for Applied Ecology, University of Canberra, ACT, 2601, Canberra, Australia

9 **Email addresses:**

10 Elodie Modave: [Elodie.modave@canberra.edu.au](mailto:Elodie.modave@canberra.edu.au)

11 Anna J MacDonald: [Anna.MacDonald@canberra.edu.au](mailto:Anna.MacDonald@canberra.edu.au)

12 Stephen D Sarre: [Stephen.Sarre@canberra.edu.au](mailto:Stephen.Sarre@canberra.edu.au)

13 **Corresponding author:**

14 Elodie Modave, Institute for Applied Ecology, University of Canberra, ACT, 2601, Australia.

15 Telephone: +61 2 6201 2267. Fax: +61 2 6201 5305. Email: [elodie.modave@canberra.edu.au](mailto:elodie.modave@canberra.edu.au)

16 **Running title:**

17 Mini-barcode for species identification

18 **ABSTRACT**

19 Background: Identification of species from trace samples is now possible through the  
20 comparison of diagnostic DNA fragments against reference DNA sequence databases. DNA

1  
2  
3  
4  
5  
6  
7  
8  
9  
10  
11  
12  
13  
14  
15  
16  
17  
18  
19  
20  
21 detection of animals from non-invasive samples, such as predator faeces (scats) that contain  
22 traces of DNA from their species of origin, has proved to be a valuable tool for management  
23 of elusive wildlife. However, application of this approach can be limited by the availability of  
24 appropriate genetic markers. Scat DNA is often degraded, meaning that longer DNA  
25 sequences, including standard DNA barcoding markers, are difficult to recover. Instead,  
26 targeted short diagnostic markers are required to serve as diagnostic mini-barcodes. The  
27 mitochondrial genome is a useful source of such trace DNA markers, because it provides  
28 good resolution at species level and occurs in high copy numbers per cell.

29 Results: We developed a mini-barcode, based on a short (178 bp) fragment of the conserved  
30 12S rRNA mitochondrial gene sequence, with the goal of discriminating amongst the scats of  
31 large mammalian predators of Australia. We tested the sensitivity and specificity of our  
32 primers and can accurately detect and discriminate amongst quolls, cats, dogs, foxes and  
33 devils from trace DNA samples.

34 Conclusions: Our approach provides a cost effective, time efficient and non-invasive tool  
35 that enables identification of all eight medium-large mammal predators in Australia,  
36 including native and introduced species, using a single test. With modification, this approach  
37 is likely to be of broad applicability elsewhere.

38 **Keywords:**

39 12S rRNA; Dasyurus; DNA barcoding; DNA detection; marsupial; monitoring

40 **BACKGROUND**

41 The looming biodiversity crisis, referred to by some as the Sixth Mass Extinction [1],  
42 has made the conservation of wildlife a rapidly growing concern. There is an urgent need to

43 document the distribution of biodiversity as the foundation for identifying effective solutions  
44 to wildlife management issues. The rapid and reliable identification of species at local and  
45 regional scales provides the first step towards determining the distribution of biodiversity in  
46 the landscape and changes that might be occurring in that distribution.

47 Advances in genetics and genomics have revolutionized many areas of biology. In  
48 particular, the identification of species from trace and environmental samples (e.g. water,  
49 soil and faeces, or scats) is now possible through DNA barcoding [2], [3], [4], [5]. The identity  
50 of an unknown sample is established by comparisons between DNA sequences obtained  
51 from that sample and an appropriate reference sequence database. The application of DNA  
52 barcoding for the identification of species from such environmental DNA (eDNA) samples is  
53 useful, particularly when the target species is rare, or elusive, where it is difficult to trap or  
54 observe without direct interference with live animals, or where morphological identification  
55 is problematic [6], [7], [8], [9], [10]. It also makes possible the identification of diet from  
56 scats where morphological determinations are likely to be unsuitable for many elements of  
57 the diet [11], [12], [13], [14], [15]. Consequently, eDNA analysis from environmental samples  
58 collected across a broad spatial and temporal distribution has great potential for enhancing  
59 biodiversity management, but is yet to be widely implemented [16], [17].

60 The DNA associated with environmental samples tends to be of low quantity or  
61 quality and can be degraded. To ensure that markers for eDNA detection are specific and  
62 sensitive, target sequences, also known as mini-barcodes, should be short (i.e. 100-200 base  
63 pairs (bp); [18], [19], [20], [2]) and yet have high discriminatory power [21], [22], [23], [24].  
64 Marker selection therefore needs to account for the range of species likely to be  
65 encountered, as well as discriminating among potential sister taxa. Mitochondrial DNA genes

66 (mtDNA) are usually targeted because they occur in multiple copies in each cell and are  
67 therefore more common in trace samples than nuclear sequences, because they can give  
68 good resolution of identification at species level, and because their genome is circular, which  
69 helps preserving the DNA in some instances. In regions where little is known of the genetic  
70 characteristics of the faunal assemblage, identifying the most appropriate DNA sequences to  
71 target the fauna present to achieve acceptable levels of accuracy is a challenging exercise  
72 and requires a reference database that is sufficiently comprehensive to ensure accurate  
73 species assignment [25]. In short, we need DNA barcoding markers that are appropriate to  
74 the question being addressed, the ecosystem considered and the taxonomic group studied.  
75 Most importantly, if DNA detection is going to be of practical benefit, we need to maximise  
76 its effectiveness by developing mini-barcodes that target as many taxa as possible, thus  
77 minimising the number of tests that need to be applied. Most barcode tests so far  
78 implemented for terrestrial systems have targeted single species (examples in [7], [9], [26],  
79 [27]) to avoid the ambiguity that might arise among closely related taxa. Here, we tackle this  
80 problem using all extant medium-large Australian mammalian predators as a case study.

81         Australia has a unique assemblage of medium-large mammalian predators, including  
82 a suite of marsupials of Gondwanan heritage intermixed with relatively recently arrived  
83 eutherian mammals introduced by humans [28], [29]. Here, we develop a DNA mini-barcode  
84 to discriminate amongst these key predators, with the goal of species identification using  
85 eDNA extracted from scats. We targeted the top native marsupial predators that are likely to  
86 produce large easily visible scats including: six species of quoll (four Australian and two New-  
87 Guinean; *Dasyurus maculatus*, *D. viverrinus*, *D. geoffroii*, *D. hallucatus*, *D. albopunctatus* and  
88 *D. spartacus*), the Tasmanian devil (*Sarcophilus harrisii*), and the extinct thylacine (*Thylacinus*  
89 *cynocephalus*), as well as key eutherian mammal predators: the native dingo (*Canis lupus*

1  
2  
3  
4  
5  
6  
7  
8  
9  
10  
11  
12  
13  
14  
15  
16  
17  
18  
19  
20  
21  
22  
23  
24  
25  
26  
27  
28  
29  
30  
31  
32  
33  
34  
35  
36  
37  
38  
39  
40  
41  
42  
43  
44  
45  
46  
90 *dingo*), and the introduced domestic dog (*Canis lupus familiaris*), red fox, (*Vulpes vulpes*),  
91 and domestic cat (*Felis catus*) that are now feral in much of the country. Most of the native  
92 marsupial predators have been in decline since, or even before, European settlement in  
93 1788 [30]. Tasmanian devils and the thylacine became extinct on the Australian mainland  
94 within the last 3000 to 4000 years [31], but still existed on the island of Tasmania at the time  
95 of European settlement. The thylacine has subsequently been hunted to extinction [32], [33]  
96 while devil populations have decreased dramatically since the 1990s following the  
97 emergence of Devil Facial Tumour Disease [34], [35], [36]. Several species of quoll, together  
98 with the dingo, have declined in distribution and abundance on the Australian mainland  
99 since European settlement from multiple causes that probably include habitat destruction,  
100 hunting, predation by cats and foxes, the spread of cane toads [37], [38], [39] and in the case  
101 of dingos, hybridisation with domestic dogs. Although declining or extinct on the mainland,  
102 substantial populations of the Tasmanian devil, the spotted-tailed quoll (*D. maculatus*) and  
103 the eastern quoll (*D. viverrinus*) remain on the island of Tasmania where they have  
104 important ecological roles [40]. However, the recent introduction of foxes to Tasmania [41]  
105 and potential competition with feral cats [42], [43] compound the issue, and have stimulated  
106 an urgent need to understand threats to native predator populations and enable effective  
107 management.

47  
48  
49  
50  
51  
52  
53  
54  
55  
56  
57  
58  
59  
60  
61  
62  
63  
64  
65  
108           Our goal was to develop a mini-barcode that can identify all medium to large  
109 mammal predators in Australia in a single analysis, including identification of all quolls to  
110 species level. This has been difficult to achieve using existing genetic markers because of the  
111 high levels of sequence conservation observed between quoll species. We compiled a  
112 reference tissue collection and identified a mini-barcode based on the conserved 12S rRNA  
113 mitochondrial sequence that discriminates among all taxa with the goal of discriminating

114 among taxa while varying little within species [44], [45]. Two factors generally limit the  
1 application of this approach. First, short diagnostic sequences that encompass the range of  
2 115 species to be targeted are difficult to find and are likely to be specific to a particular faunal  
3  
4  
5 116 assemblage. Second, the full suite of potential target organisms tends to be poorly known in  
6  
7  
8 117 most natural systems, and reference DNA sequences are not available for many wildlife  
9  
10 118 species, necessitating the development of reference libraries to guide marker selection and  
11  
12  
13 119 interpretation of results. We evaluate the specificity and sensitivity of this mini-barcode  
14  
15 120 using the framework outlined in [25] and [46]. By targeting all extant medium to large  
16  
17  
18 121 carnivores in Australia, we aim to produce a mini-barcode that can be applied broadly within  
19  
20  
21 122 continental Australia as well as Tasmania. We demonstrate that despite close homology  
22  
23 123 among some taxa, it is possible to design and implement eDNA markers with high  
24  
25  
26 124 discriminatory power for key continental terrestrial fauna incorporating both marsupials and  
27  
28  
29 125 eutherian mammals. Our approach can be implemented in other parts of the world by  
30  
31  
32 126 targeting appropriate fauna assemblage in the development of the mini-barcode.  
33  
34  
35  
36

## 37 128 **DATA DESCRIPTION**

38  
39

40 129 We identified the 12S rRNA gene as a target for development of a mini-barcode  
41  
42  
43 130 marker. We developed a reference DNA database for this gene, including 174 sequences  
44  
45  
46 131 from 24 genera and 41 mammal species. Sequences were obtained from GenBank, with  
47  
48  
49 132 additional targeted sequencing conducted for species under-represented in GenBank.  
50  
51 133 Sequences were aligned, trimmed to 901 bp, and are provided here in FASTA format  
52  
53 134 (Additional file 1) with additional information on sample and sequence origins in .csv format  
54  
55  
56 135 (Additional file 2).  
57  
58  
59  
60  
61  
62  
63  
64  
65



136 We used the R package SPIDER [47] to conduct a sliding window analysis to identify a short  
137 diagnostic region of the 12S rRNA gene suitable for use as a mini-barcode marker. R code for  
138 this analysis is provided in text format (Additional file 3).

139       Following design of the *AusPreda\_12S* primers, we conducted bioinformatic and  
140 laboratory evaluations of the sensitivity and specificity of the mini-barcode. We created two  
141 modified versions of our reference 12S rRNA database, trimmed to include only the 178 bp  
142 flanked by the mini-barcode *AusPreda\_12S* primers. The “FULL” database included all 174  
143 sequences from the original database, while the “UNIQUE” database included a subset of 44  
144 sequences, where each haplotype was represented by only a single sequence, and where  
145 singleton species (species represented by only one haplotype) were removed. These two  
146 databases are provided here in FASTA format (Additional files 4 and 5). We used the R  
147 package SPIDER to conduct genetic distance based evaluations of the *AusPreda\_12S* primers,  
148 to identify the risks of incorrect or ambiguous species identifications based on this sequence.  
149 R code for these analyses is provided in text format (Additional file 6) and detailed results  
150 are provided in .csv format (Additional file 7).

151       We conducted PCRs to evaluate amplification success using the *AusPreda\_12S*  
152 primers on tissue samples from a range of mammal species. Details of samples used are  
153 provided in .csv format (Additional file 8). We also tested amplification success from known-  
154 origin scats collected from six different predator species. All PCR products successfully  
155 amplified from scats were sequenced to confirm predator of origin: resulting sequences are  
156 provided here in FASTA format (Additional file 9).

## 157 **RESULTS**

### 158 **Development of a new mammal mini-barcode**

159 We selected the 12S rRNA gene as a promising candidate marker for development of  
1  
2  
3 160 a mini-barcode and developed a 12S rRNA reference sequence database for Australian  
4  
5 161 mammals comprising 174 sequences. Within the 12S rRNA gene, we identified a 178 bp  
6  
7 162 diagnostic mini-barcode region that displayed high levels of inter-specific variation. We  
8  
9  
10 163 designed conserved primers, *AusPreda\_12SF* and *AusPreda\_12SR*, to amplify this mini-  
11  
12  
13 164 barcode from a range of mammal species, producing a PCR product of 218 bp in length  
14  
15 165 including primers.

### 19 166 **Bioinformatic evaluation of the mini-barcode**

22 167 We used three different genetic distance based analyses to estimate the risks of  
23  
24  
25 168 species mis-identification when using our *AusPreda\_12S* primers on samples of unknown  
26  
27 169 origin (Table 1, Additional file 7). These analyses used versions of the 12S rRNA reference  
28  
29  
30 170 sequence database, trimmed to include only the 178 bp mini-barcode region (Additional files  
31  
32  
33 171 4 and 5). A *nearNeighbour* analysis of all sequences (the “FULL” database) correctly  
34  
35 172 identified 156 sequences and incorrectly identified 18 sequences. All incorrectly identified  
36  
37  
38 173 sequences originated from species for which only a single reference sequence was available  
39  
40 174 (i.e. singleton species), and thus the nearest neighbour was automatically another species. In  
41  
42  
43 175 most cases this nearest neighbour was a member of the same genus. For example, the  
44  
45 176 nearest neighbour of the only bronze quoll (*D. spartacus*) sequence available was from the  
46  
47  
48 177 western quoll (*D. geoffroii*). This close genetic similarity has also been shown by Woolley *et*  
49  
50  
51 178 *al.* [48]. Further analyses using a database including only unique haplotypes, from which  
52  
53 179 singleton species were excluded (the “UNIQUE” database) identified correctly all 44  
54  
55  
56 180 sequences.

181 Table 1: Summary of results of genetic distance-based evaluations of the *AusPreda\_12S* mini-  
 182 barcode.

|                          | FULL (1% threshold) |                   |           |       | UNIQUE (4% threshold) |                   |           |       |
|--------------------------|---------------------|-------------------|-----------|-------|-----------------------|-------------------|-----------|-------|
|                          | Correct / True      | Incorrect / False | Ambiguous | No ID | Correct / True        | Incorrect / False | Ambiguous | No ID |
| <i>Nearest neighbour</i> | 155                 | 18                | -         | -     | 44                    | 0                 | -         | -     |
| <i>Best close match</i>  | 147                 | 3                 | 0         | 24    | 42                    | 0                 | 0         | 2     |
| <i>Thresh ID</i>         | 142                 | 3                 | 5         | 24    | 42                    | 0                 | 0         | 2     |

183  
 184 Legend: Summary of results of genetic distance-based evaluations of the *AusPreda\_12S* mini-barcode  
 185 conducted using the R package SPIDER to analyse the “FULL” and “UNIQUE” reference sequences  
 186 databases. The specified genetic distance thresholds were used for the *bestCloseMatch* and *threshID*  
 187 analyses

188  
 189 *BestCloseMatch* and *ThreshID* analyses, which both assume that sequences from a  
 190 single species fall within a specified genetic distance threshold, correctly identified 147 and  
 191 142 sequences respectively in the “FULL” database. Three sequences were incorrectly  
 192 identified in both analyses: *Dasyurus spartacus* (AF009892), *Pseudantechinus*  
 193 *macdonnellensis* (EU086642) and *Pseudantechinus roryi* (EU086650) each representing  
 194 singleton species, and falling within the 1% genetic distance threshold of a congeneric  
 195 species enabling them to be mistaken for their close relatives. Five *D. geoffroii* sequences  
 196 were correctly identified using *BestCloseMatch* but were ambiguously identified in the  
 197 *ThreshID* analysis because of a close similarity (within the 1% genetic distance threshold)  
 198 with the single *D. spartacus* sequence. A further 24 sequences could not be identified in  
 199 either analysis because all other sequences within the reference database were more than  
 200 1% different. The majority of these sequences were from singletons, but a more relaxed  
 201 genetic distance threshold (2%-5%) identified them correctly. *BestCloseMatch* and *ThreshID*  
 202 analyses of the “UNIQUE” database identified correctly 42 of 44 sequences, but the two  
 203 remaining sequences, both from *Dasyercus cristicauda*, could not be identified (Table 1;  
 204 details of results: Additional file 7). As noted previously, these sequences would have been  
 205 correctly identified if a genetic distance threshold of 5% was used.

206 **Evaluation of the amplification success and sensitivity of the *AusPreda\_12S* primers**

1  
2  
3 207 Our mini-barcode was successfully amplified from all 45 tissue samples tested,  
4  
5  
6 208 including samples from a wide range of Australian mammals, as well as a reptile, an  
7  
8 209 amphibian and a bird (Figure 1, Additional file 8). This demonstrates the broad applicability  
9  
10  
11 210 of the primers across the mammalian taxa.

12  
13  
14 211 We also successfully amplified our mini-barcode from a wide range of input template  
15  
16  
17 212 DNA concentrations. We set up serial dilutions of DNA from six predator species.  
18  
19  
20 213 Amplification was successful for all three qPCR replicates from all six species for all dilutions  
21  
22 214 from 9 ng /  $\mu$ l to 9 pg /  $\mu$ l inclusive, demonstrating that the primers can amplify from low  
23  
24  
25 215 quantity DNA. Amplification success was less consistent at the highest and lowest DNA  
26  
27 216 concentrations, estimated at 90 ng /  $\mu$ l, 0.9 pg /  $\mu$ l and 0.09 pg /  $\mu$ l (Table 2) indicating that  
28  
29  
30 217 reliability of predator detection from DNA below 9 pg /  $\mu$ l may be poor. Failure to amplify  
31  
32  
33 218 from highly concentrated DNA, despite successful amplification from dilutions of the same  
34  
35 219 DNA extracts, may reflect the presence of PCR inhibitors in these extracts, which were  
36  
37  
38 220 obtained from museum and roadkill specimens.

39  
40  
41 221

42  
43  
44  
45 222

46  
47  
48 223

49  
50  
51  
52 224

53  
54  
55 225

56  
57  
58  
59 226

227 Table 2: Results of qPCR tests: determine amplification success of the *AusPreda\_12S* mini-barcode  
 228 from low template DNA.

| Species                                        | Dilution                    | Replicate 1         | Replicate 2         | Replicate 3         | CT Mean <sup>1</sup> |
|------------------------------------------------|-----------------------------|---------------------|---------------------|---------------------|----------------------|
| <b>Cat<br/>N22b</b>                            | 1 in 10 (9 ng/μl)           | 12.444              | 14.281              | 13.373              | 13.366               |
|                                                | 1 in 100 (0.9 ng/μl)        | <b>16.346*</b>      | 13.399              | 13.368              | 13.384               |
|                                                | 1 in 1000 (0.09 ng/μl)      | 19.252              | 23.382              | 23.994              | 22.209               |
|                                                | 1 in 10 000 (9 pg/μl)       | 31.252              | 27.486              | 27.604              | 28.781               |
|                                                | 1 in 100 000 (0.9 pg/μl)    | 31.483              | 31.476              | 29.386              | 30.782               |
|                                                | 1 in 1 000 000 (0.09 pg/μl) | <b>Undetermined</b> | <b>Undetermined</b> | <b>Undetermined</b> | -                    |
| <b>Dingo<br/>AA15020</b>                       | 1 in 10 (9 ng/μl)           | 14.303              | 13.019              | 15.363              | 14.228               |
|                                                | 1 in 100 (0.9 ng/μl)        | 15.879              | 16.791              | 16.623              | 16.431               |
|                                                | 1 in 1000 (0.09 ng/μl)      | 19.719              | 19.237              | 17.424              | 18.793               |
|                                                | 1 in 10 000 (9 pg/μl)       | 22.652              | 24.957              | 25.196              | 24.268               |
|                                                | 1 in 100 000 (0.9 pg/μl)    | <b>Undetermined</b> | <b>Undetermined</b> | <b>Undetermined</b> | -                    |
|                                                | 1 in 1 000 000 (0.09 pg/μl) | <b>Undetermined</b> | <b>Undetermined</b> | <b>Undetermined</b> | -                    |
| <b>Eastern<br/>quoll<br/>UC1214</b>            | 1 in 10 (9 ng/μl)           | 14.128              | 13.509              | 13.449              | 13.695               |
|                                                | 1 in 100 (0.9 ng/μl)        | 17.267              | <b>20.866*</b>      | 17.235              | 17.251               |
|                                                | 1 in 1000 (0.09 ng/μl)      | 17.662              | 21.523              | 21.385              | 20.190               |
|                                                | 1 in 10 000 (9 pg/μl)       | 24.346              | 26.474              | 25.653              | 25.491               |
|                                                | 1 in 100 000 (0.9 pg/μl)    | <b>Undetermined</b> | <b>Undetermined</b> | 34.570              | 34.570               |
|                                                | 1 in 1 000 000 (0.09 pg/μl) | <b>Undetermined</b> | <b>Undetermined</b> | <b>Undetermined</b> | -                    |
| <b>Spotted-<br/>tailed<br/>quoll<br/>A3395</b> | 1 in 10 (9 ng/μl)           | 13.460              | 13.928              | 14.048              | 13.812               |
|                                                | 1 in 100 (0.9 ng/μl)        | 17.517              | 16.447              | 18.653              | 17.539               |
|                                                | 1 in 1000 (0.09 ng/μl)      | 20.374              | 19.540              | 17.003              | 18.972               |
|                                                | 1 in 10 000 (9 pg/μl)       | 27.511              | 25.453              | 23.851              | 25.605               |
|                                                | 1 in 100 000 (0.9 pg/μl)    | 30.158              | 30.132              | 25.107              | 28.466               |
|                                                | 1 in 1 000 000 (0.09 pg/μl) | <b>Undetermined</b> | 35.172              | <b>Undetermined</b> | 35.172               |
| <b>Red fox<br/>UC0401</b>                      | 1 in 10 (9 ng/μl)           | 15.547              | 15.528              | 14.628              | 15.234               |
|                                                | 1 in 100 (0.9 ng/μl)        | 19.566              | 17.524              | 16.860              | 17.983               |
|                                                | 1 in 1000 (0.09 ng/μl)      | 21.915              | 22.827              | 22.360              | 22.367               |
|                                                | 1 in 10 000 (9 pg/μl)       | 26.672              | 25.460              | 25.508              | 25.880               |
|                                                | 1 in 100 000 (0.9 pg/μl)    | 31.672              | 30.914              | 28.863              | 30.483               |
|                                                | 1 in 1 000 000 (0.09 pg/μl) | <b>Undetermined</b> | 31.601              | <b>Undetermined</b> | 31.601               |
| <b>Tasmanian<br/>devil<br/>A3357</b>           | 1 in 10 (9 ng/μl)           | 15.502              | <b>16.810*</b>      | 14.536              | 15.019               |
|                                                | 1 in 100 (0.9 ng/μl)        | 19.736              | 18.729              | 19.702              | 19.389               |
|                                                | 1 in 1000 (0.09 ng/μl)      | 23.517              | 22.999              | 21.591              | 22.702               |
|                                                | 1 in 10 000 (9 pg/μl)       | 27.216              | 28.006              | 24.130              | 26.451               |
|                                                | 1 in 100 000 (0.9 pg/μl)    | 30.876              | 30.734              | 28.977              | 30.196               |
|                                                | 1 in 1 000 000 (0.09 pg/μl) | 32.534              | <b>Undetermined</b> | <b>Undetermined</b> | 32.534               |

229 Legend: Results of qPCR tests conducted to determine amplification success of the *AusPreda\_12S*  
 230 mini-barcode from low template DNA. Numbers represent observed CT values for each replicate  
 231 qPCR of a series of DNA dilutions.

232 <sup>1</sup>undetermined results were excluded when calculating mean CT.

233 \*where the qPCR traces were of an irregular shape (three replicates), the replicate was excluded  
1 234 when calculating mean CT.

### 235 **Evaluation of amplification success from trace samples using known-origin scats**

236 We tested the ability of the *AusPreda\_12S* primers to correctly identify the known  
237 predator by analysing scats from captive animals. 57 scats were tested and amplified  
238 product was obtained from 53 samples. We obtained good quality DNA sequences, ranging  
239 from 116 bp to 182 bp in length, from 49 (92%) of these 53 scats (Additional file 9). The  
240 species of origin was correctly identified for all 49 samples, with scat DNA sequences  
241 matched to appropriate GenBank reference sequences with 97-100% sequence identity  
242 (Table 3).

## 243 **DISCUSSION**

244 Non-invasive environmental DNA-based methods can provide a novel approach to  
245 the detection of cryptic animals in large-scale surveys [49], with applications to wildlife  
246 management. Such DNA approaches can make important contributions to the ability to  
247 detect incursions or monitor established invasive species [50], [51], [41] or to detect very  
248 rare or declining species of conservation significance [52][8].

249 Here, we report a PCR-based mini-barcode test for medium-large Australian  
250 mammalian predators. This test can amplify DNA from and discriminate among the four  
251 quoll species found in Australia, as well as the Tasmanian devil (the only other extant large  
252 marsupial predator) and introduced mammal carnivores with a high level of accuracy. We  
253 expect that these primers will also amplify DNA from both species of New Guinean quoll.  
254 Previous studies have applied barcoding methods to detect individual species across  
255 multiple time points (examples in [53], [54]). Here we have shown that it is also possible to

256 identify multiple species from a single DNA test, using a straightforward PCR and Sanger  
1  
2  
3 257 sequencing approach. All clear sequences obtained from 49 scats of six target predator species  
4  
5 258 were correctly identified to species level. In the small number of cases where a clear sequence  
6  
7 259 was not obtained from a scat, we found that the sequences obtained were mixed, probably  
8  
9  
10 260 arising from the amplification of two or more species in the same sample. This could arise  
11  
12  
13 261 from cross contamination among samples but is more likely the result of the amplification of  
14  
15 262 prey DNA present in the scat [14], [55]. We have previously observed this phenomenon  
16  
17  
18 263 when using a single species test to detect fox DNA, where rabbit or hare DNA were  
19  
20  
21 264 sometimes erroneously amplified [37]. This demonstrates the need to account for the  
22  
23 265 history of samples analysed (how they were obtained, how fresh they were upon collection,  
24  
25  
26 266 and how samples and DNA extracts were stored) and the importance of a DNA sequencing  
27  
28 267 step in any of these analyses to enable recognition of non-specific PCR amplification. In  
29  
30  
31 268 addition to successful amplification of scat DNA, we demonstrate that our mini-barcode  
32  
33  
34 269 primers can successfully amplify low-template DNA (at least as low as 0.9 pg /  $\mu$ l) from  
35  
36 270 museum samples. This provides further evidence of the utility of this marker for application  
37  
38  
39 271 to eDNA studies.

42 272 Whilst DNA metabarcoding may more clearly determine which species are  
43  
44  
45 273 represented by mixed samples, metabarcoding methods are relatively costly and require  
46  
47 274 more specialist equipment, which may not be available to many wildlife managers. In this  
48  
49  
50 275 study, PCR and Sanger sequencing reliably identified the predator of origin for 86% of scat  
51  
52  
53 276 samples, which is likely to be sufficient for many management applications and is a higher  
54  
55 277 success rate than has been reported for several other faecal DNA studies [41], [56]. Using  
56  
57  
58 278 our approach, DNA can be screen for the presence of multiple predator species in a single  
59  
60 279 and inexpensive test, without the need to develop and apply a set of species-specific primers

280 for each predator of interest. We provide a non-invasive instrument with potential utility for  
281 scientists or managers working with endangered or invasive Australian predators, but a  
282 similar approach could be used to target predator assemblages in other regions.

283 The bioinformatic evaluation of our mini-barcode shows that this marker can reliably  
284 discriminate among the eight target predator species (eastern, western, northern and  
285 spotted-tail quolls, Tasmanian devils, cats, dogs and foxes) in Australia. The close genetic  
286 similarity between the bronze quoll (from New Guinea) and the western quoll (from  
287 Australia), described above and supported by [48], may pose some problems for reliable  
288 species identification from unknown samples, but the different geographic distributions of  
289 these two species will likely provide a clear identification in most cases.

290 Further development of our reference database, to include additional *D.*  
291 *albopunctatus* and *D. spartacus* sequences, will be required to better understand the utility  
292 of this test for identification of specimens to species level in New Guinea. Likewise, a better  
293 reference database would improve the relevance of this DNA test for application to historic  
294 samples. Sequences from the extinct thylacine could be clearly identified in our initial  
295 analyses, but this species could not be included in the UNIQUE database for further  
296 bioinformatic analysis because only one 12S rRNA haplotype was available. Finally, because  
297 we are working with mitochondrial DNA which is maternally inherited, we cannot currently  
298 use this test to distinguish between dogs and dingos, in part because of the prevalence of  
299 hybrids in many wild populations.

### 300 **Considerations when working with scats**

301 One important consideration for future studies using the *AusPreda\_12S* primers is  
302 the need to understand the ecological role of the species from which eDNA is detected.



1  
2  
3 304  
4  
5 305  
6  
7  
8 306  
9  
10 307  
11  
12  
13 308  
14  
15 309  
16  
17  
18 310  
19  
20  
21  
22  
23  
24

Typically, predator DNA is the most abundant in scats, owing to the release of epithelial cells during defecation [57], [58], [59]. However, because there are multiple potential sources of DNA in scat samples, it is also possible that these primers will amplify DNA from prey species. In some cases, this will be obvious, for example where the scats of the prey species detected are clearly morphologically different from carnivore scats. However, other results may be more difficult to interpret, for example where mixed sequences, representing two different predator species which could potentially predate upon one another, are obtained from the same sample.

### 21 311 **Conservation implications**

25 312  
26  
27 313  
28  
29  
30 314  
31  
32  
33 315  
34  
35 316  
36  
37  
38 317  
39  
40 318  
41  
42  
43 319  
44  
45 320  
46  
47  
48 321  
49  
50  
51 322  
52  
53 323  
54  
55  
56 324  
57  
58

The *AusPreda\_12S* primers provide an opportunity to enhance monitoring of predators across Australia for conservation purposes. For example, western quolls were successfully re-established in Western Australia in 1987 after a recovery plan implemented over 13 years, in areas previously baited with 1080 to remove introduced species [60]. Western quolls from Western Australia were also re-introduced to the Flinders Ranges in South Australia in 2014, and that population is now breeding in the wild, with more than 60 young born since their relocation [61], [62]. Eastern quolls were re-introduced from Tasmania to Mulligans Flat Woodland Sanctuary, in the Australian Capital Territory, in early 2016 [63]. There are also proposals to reintroduce devils to south-eastern mainland Australia to reduce the negative impact that dingo control has on small-mammals through mesopredator release [64], [65], [66], [67]. The development of this mini-barcode now provides a new tool with which to monitor these re-introduced species, and the non-native predators that threaten them, from non-invasive samples.

### 59 325 **Future work**

326 In the future, this predator identification tool may be used to model the distribution  
1  
2  
3 327 of predators in Tasmania or mainland Australia, supplementing more traditional data  
4  
5 328 obtained from live trapping and sightings. It is now possible to reliably detect a predator of  
6  
7 329 interest from non-invasive samples. Using the *AusPreda\_12S* primers in an initial sample  
8  
9  
10 330 screening step may provide further opportunities to study the diets of each specific  
11  
12 331 predator, by identifying samples to include in targeted metabarcoding studies. This test  
13  
14  
15 332 could also be more broadly useful, with potential application to detection and monitoring of  
16  
17  
18 333 the two New Guinean quoll species.

## 334 **METHODS**

### 335 **Selection of a candidate marker gene**

336 We compiled initial reference databases for three mitochondrial genes, 12S rRNA,  
29  
30  
31 337 16S rRNA and ND2, all of which have proven useful for species detection in other studies  
32  
33  
34 338 [59], [68], [69], [70], [71]. These databases used sequences collected mainly from GenBank  
35  
36 339 [72], [73].

340 We used the R package SPIDER to identify potential mini-barcodes from these initial  
41  
42 341 reference databases. For each gene, we conducted a sliding window analysis with a window  
43  
44  
45 342 size of 20 bp (representing the length of a typical primer) to identify potential sites for  
46  
47 343 marker development. We considered suitable candidate markers to be regions up to 200 bp  
48  
49  
50 344 in length, incorporating two primer sites (each of 20 bp in length) that were well-conserved  
51  
52 345 across all taxa but which flanked a region of 100-200 bp that displayed high levels of inter-  
53  
54  
55 346 specific variation. We were not able to identify any candidate mini-barcode markers that  
56  
57  
58 347 met these criteria from the 16S rRNA and ND2 genes, so all subsequent work was focused on  
59  
60 348 the 12S rRNA gene.

## 349 **Development of a reference database for the 12S rRNA gene**

1  
2  
3 350 We constructed a reference database for the 12S rRNA gene. This included  
4  
5  
6 351 representatives of native and introduced Tasmanian mammal predators and their potential  
7  
8 352 prey species, their mainland Australian relatives, livestock and other introduced species (i.e.  
9  
10  
11 353 goat, sheep, horse, wild boar, cow and fallow deer) and humans. Importantly, all six  
12  
13 354 recognised quoll species (four Australian and two New Guinean) were represented  
14  
15  
16 355 (Additional files 1 and 2). The final reference database consisted of 174 sequences  
17  
18 356 representing 41 species from 24 genera. We obtained the majority of sequences from  
19  
20  
21 357 GenBank, but we generated additional sequences from a selection of species that were  
22  
23  
24 358 under-represented in the public database. DNA was extracted from tissue samples from  
25  
26 359 museum specimens, road-killed animals, and western quoll tissues collected during a  
27  
28  
29 360 reintroduction program in the Flinders Ranges (South Australia) involving quolls of Western  
30  
31  
32 361 Australian origin [74]. We used a salting out method [75] with minor modifications as  
33  
34 362 follows. Our lysis buffer included 10% SDS and tissues were digested in a thermomixer for  
35  
36  
37 363 three hours at 56 °C with mixing at 500 rpm. DNA pellets were air dried for 30-60 minutes  
38  
39  
40 364 and re-suspended in 50 µl of ddH<sub>2</sub>O. Genomic DNA extracts were quantified using a  
41  
42 365 Nanodrop ND1000 spectrophotometer (Thermo Fischer Scientific) and samples were diluted  
43  
44  
45 366 with ddH<sub>2</sub>O to a final concentration of *ca* 40 ng/ µl. The entire 12S gene region was  
46  
47 367 amplified by PCR using primers 12C and 12gg (Table 4). PCRs of 25 µl final volume contained  
48  
49  
50 368 0.4 µM of each primer, 1x MyTaq™ red mix (Bioline) and *ca* 3.2 ng/ µl of genomic DNA.  
51  
52 369 Cycling conditions were: 95 °C for 2 mins; ten cycles of 95 °C for 20 s, a touchdown from 60  
53  
54  
55 370 °C - 50 °C for 20 s, and 72 °C for 1 min; then 35 cycles of 95 °C for 20 s, 50 °C for 20 s, and 72  
56  
57  
58 371 °C for 1 min; followed by a final extension at 72 °C for 4 mins. PCR products were visualised  
59  
60 372 on a 1.7% TBE agarose gel (Agarose I: Amresco, Solon, OH, USA) run for 40 mins at 90 V.

373 Hyperladder 50 bp (Bioline, Australia) was included to serve as a size reference. Amplicons  
 374 were cleaned using Diffinity rapid tips (Scientific Specialties, Inc., California, USA) and  
 375 prepared for sequencing following protocols recommended by the Biomolecular Resource  
 376 Facility (Australian National University) before being sequenced in both directions on a 96  
 377 capillary 3730 DNA Analyzer (Applied Biosystems). Forward and reverse sequences for each  
 378 sample were manually checked, trimmed of primer sequences and low quality bases at the  
 379 3' ends, and aligned using Geneious 8.1.7 (Biomatters, Auckland, New Zealand) [76]. The  
 380 final alignment was 901 bp in length.

381 **Table 4: PCR primers used in this study.**

| Marker                | Sequence (5' – 3')                  | Amplicon length | Reference  |
|-----------------------|-------------------------------------|-----------------|------------|
| <b>12C &amp; 12GG</b> | 12C: AAAGCAAARCACTGAAAATG           | 1061 bp         | [77]       |
|                       | 12GG: TRGGTGARGCTRRRTGCTTT          |                 |            |
| <b>AusPreda_12S</b>   | AusPreda_12SF: CCAGCCACCGCGGTCATACG | 218 bp          | This study |
|                       | AusPreda_12SR: GCATAGTGGGGTCTCTAATC |                 |            |

### 382 **Development of primers for the mini-barcode**

383 We conducted a sliding window analysis of our 12S rRNA reference database, using  
 384 the R package SPIDER [47]. This identified a single candidate mini-barcode region within the  
 385 12S gene that included a region of less than 200 bp with high levels of inter-specific  
 386 variation, flanked by highly conserved regions ideal for primer design (Figure 2 and  
 387 Additional file 3). We designed two primers within the flanking regions: *AusPreda\_12SF* (5'-  
 388 CCAGCCACCGCGGTCATACG-3') and *AusPreda\_12SR* (5'-GCATAGTGGGGTCTCTAATC-3')  
 389 (Table 4). These amplify a product of 218 bp in length (178 bp excluding primers).

### 390 **Bioinformatic evaluation of the mini-barcode**

391 We used additional functions of the R package SPIDER to estimate the risks of species  
1  
2 392 mis-identification when using our *AusPreda\_12S* primers on samples of unknown origin.  
3  
4  
5 393 These analyses were conducted using two versions of our 12S reference database, trimmed  
6  
7 394 to include only the 178 bp of sequences flanked by the *AusPreda\_12S* primers. The “FULL”  
8  
9  
10 395 database included all 174 sequences present in the original database (Additional file 4). The  
11  
12  
13 396 “UNIQUE” database was a subset of the “FULL” database in which each haplotype was  
14  
15 397 represented by only a single sequence, and in which singleton species (species represented  
16  
17  
18 398 by only one haplotype) were removed. This included 44 sequences representing 16 species  
19  
20 399 from 12 genera (Additional file 5).  
21  
22  
23

24 400 Pairwise genetic distance was calculated for each pair of sequences using the “raw”  
25  
26 401 model. We conducted bioinformatic analyses using the *nearNeighbour*, *bestCloseMatch*, and  
27  
28  
29 402 *threshID* functions to identify the taxa most likely to be misidentified or ambiguously  
30  
31  
32 403 identified using our primers. R code for these analyses is provided in Additional file 6. The  
33  
34 404 *nearNeighbour* function determines, for each sequence in the reference database, whether  
35  
36  
37 405 the most closely related sequence originates from a conspecific, with two outcomes  
38  
39  
40 406 possible: “true” or “false”. A genetic distance threshold must be specified for the  
41  
42 407 *bestCloseMatch* and *threshID* functions to account for intra-specific variation. We estimated  
43  
44  
45 408 the most appropriate genetic thresholds to use for the “UNIQUE” and “FULL” databases to  
46  
47 409 be 4% and 1% respectively based on the thresholds with the lowest cumulative error. The  
48  
49  
50 410 *bestCloseMatch* analysis identified the most closely related sequence, within the specified  
51  
52 411 genetic distance threshold, and its species of origin, for each query sequence. The *threshID*  
53  
54  
55 412 analysis extended this, to consider species of origin for all sequences within the genetic  
56  
57  
58 413 distance threshold. These analyses had four possible outcomes: “correct”, “incorrect”,  
59  
60 414 “ambiguous” and “no identification” [47].  
61

## 415 **Evaluation of the amplification success and sensitivity of the *AusPreda\_12S* primers**

1  
2  
3 416 We screened a panel of DNA samples from 45 specimens representing 40 species  
4  
5  
6 417 (Additional file 8) to evaluate amplification success of the *AusPreda\_12S* primers. DNA was  
7  
8  
9 418 extracted from tissue samples as described above, and amplified with the *AusPreda\_12S*  
10  
11 419 primers using the same cycling conditions as for the 12C and 12gg primers above, with PCR  
12  
13  
14 420 products visualised on a 1.7% TBE agarose gel to determine amplification success (Figure 1).  
15

16  
17 421 To test the sensitivity of our primers to detect low template DNA samples, we set up  
18  
19  
20 422 serial dilutions of six DNA extracts originating from museum samples, representing each of  
21  
22 423 the six mammal predators that might be detected in Tasmania (Tasmanian devil, eastern  
23  
24  
25 424 quoll, spotted tail quoll, cat, dog and fox). The DNA concentration of each original DNA  
26  
27 425 extraction was determined using a Qubit Fluorometer and the Qubit dsDNA BR Assay Kit  
28  
29  
30 426 (Thermo Fisher) and diluted with ddH<sub>2</sub>O if necessary to obtain a starting concentration of 90  
31  
32  
33 427 ng /  $\mu$ l. We then set up a series of six 10 X dilutions from each of these “undiluted” (90 ng /  
34  
35 428  $\mu$ l) samples. For each dilution of each sample, we performed three qPCR replicates, each  
36  
37  
38 429 with a total volume of 25  $\mu$ l including 1X Gold buffer (Applied Biosystems), 2 mM MgCl<sub>2</sub>, 0.4  
39  
40  
41 430 mg / ml BSA, 0.4  $\mu$ M of each primer, 0.6  $\mu$ l SYBR green (1:2000 Life Technologies nucleic acid  
42  
43 431 gel stain), 0.25 mM of each dNTP, 1 unit of AmpliTaq Gold™ (Applied Biosystems) and 2  $\mu$ l of  
44  
45  
46 432 the appropriate DNA dilution. qPCRs were conducted using a Viia7 Real-Time PCR system  
47  
48 433 (Thermo Fisher Scientific) with an initial step of 95 °C for 5 mins; followed by 40 cycles of 95  
49  
50  
51 434 °C for 30 s, 57 °C for 30 s and 72 ° for 30 s. We conducted a comparative CT analysis using  
52  
53  
54 435 the ViiA7 software v1.2.4, with a threshold of 5,000  $\Delta$ Rn. For each dilution of each DNA  
55  
56 436 sample we calculated the mean CT value and the standard deviation across PCR replicates.  
57

## 59 437 **Evaluation of amplification success from trace samples using known-origin scats**

438 We used previously-extracted DNA from 57 scats of known-origin collected in 2010-  
1  
2  
3 439 2011 from captive animals, including eastern quolls, spotted-tailed quolls, Tasmanian devils,  
4  
5 440 foxes, cats and dogs. DNA was extracted using a combined chelex (Bio Rad Laboratories,  
6  
7 441 Hercules, California, USA) and spin column (Mega quick-spin Total Fragment DNA  
8  
9  
10 442 Purification Kit, Intron Biotechnology) methods [78]. We evaluated amplification success  
11  
12  
13 443 from these samples using the *AusPreda\_12S* primers, by conducting PCRs and visualising PCR  
14  
15 444 products by gel electrophoresis as described above.

16  
17  
18  
19 445 All amplified products were sequenced in both directions using the *AusPreda\_12S*  
20  
21 446 primers, following the methods described above for primers 12C and 12gg. Forward and  
22  
23  
24 447 reverse reads were aligned in Geneious 8.1.7 using a global alignment with free end gaps  
25  
26 448 (Geneious alignment) allowing 65% similarity. Primers were trimmed and a consensus  
27  
28  
29 449 sequence was generated for each sample. Consensus sequences were compared against the  
30  
31  
32 450 GenBank database using nucleotide BLAST (Basic Local Alignment Search Tool, MEGABLAST  
33  
34 451 with the “nr” option and a maximum hit of 20) to identify the most likely species of origin.

#### 35 36 37 38 452 **Availability of supporting data and material**

39  
40  
41 453 The datasets and R code associated with this article are provided as supporting information.

42  
43 454 All DNA sequences generated during this study have been submitted to GenBank: accession  
44  
45  
46 455 numbers KX786294 to KX786344.

47  
48 456 *Additional file 1:* 12S rRNA reference sequence database used for primer design (FASTA  
49  
50  
51 457 format)

52  
53  
54 458 *Additional file 2:* Samples included in the 12S rRNA reference sequence database used for  
55  
56  
57 459 primer design (.csv format)

58  
59  
60 460 *Additional file 3:* R code for sliding windows analysis implemented using SPIDER (text format)

1  
2  
3  
4  
5  
6  
7  
8  
9  
10  
11  
12  
13  
14  
15  
16  
17  
18  
19  
20  
21  
22  
23  
24  
25  
26  
27  
28  
29  
30  
31  
32  
33  
34  
35  
36  
37  
38  
39  
40  
41  
42  
43  
44  
45  
46  
47  
48  
49  
50  
51  
52  
53  
54  
55  
56  
57  
58  
59  
60  
61  
62  
63  
64  
65

461 *Additional file 4*: Reference database used for genetic distance based evaluation of the

462 *AusPreda\_12S* mini-barcode: “FULL” database (FASTA format)

463 *Additional file 5*: Reference database used for genetic distance based evaluation of the

464 *AusPreda\_12S* mini-barcode: “UNIQUE” database (FASTA format)

465 *Additional file 6*: R code for genetic distance based evaluation of the *AusPreda\_12S* mini-

466 barcode implemented using SPIDER (text format)

467 *Additional file 7*: Detailed results of genetic distance based evaluation of the *AusPreda\_12S*

468 mini-barcode (.csv format)

469 *Additional file 8*: Samples included in the laboratory evaluation of the *AusPreda\_12S* mini-

470 barcode (.csv format)

471 *Additional file 9*: Consensus sequences obtained from 53 known-origin scats by amplification

472 with the *AusPreda\_12S* mini-barcode (FASTA format)

473 The datasets supporting results of this article are available in the [X](#) repository, <#>

#### 474 **List of abbreviations**

475 BLAST: Basic Local Alignment Search Tool: Tool available through NCBI to compare an

476 unknown sequence to existing sequences in a public database.

477 bp: base pairs: pairs of nucleotides in a DNA or RNA strand

478 CT value: cycle threshold: the number of cycles required for the fluorescent signal of a qPCR

479 machine to cross the predetermined threshold.

480 DNA: deoxyribonucleic acid

481 mtDNA: mitochondrial DNA



1  
2  
3 482 eDNA: environmental DNA

4  
5  
6 483 PCR: polymerase chain reaction, a method used to amplify a target DNA or RNA strand

7  
8  
9 484 rRNA: ribosomal ribonucleic acid

10  
11  
12 485 TBE: Tris/Borate/EDTA: buffer for gel electrophoresis

13  
14  
15 486 **Consent for publication**

16  
17  
18 487 Not applicable

19  
20  
21 488 **Competing interests**

22  
23  
24 489 Not applicable

25  
26  
27 490 **Funding**

28 491 This study was funded by the Invasive Animals Cooperative Research Centre as part of  
29  
30 492 project 1.L.21.

31  
32  
33 493 **Authors' contributions**

34  
35  
36 494 EM, AM and SS designed the study. EM performed the experiments. EM and AM analysed  
37  
38 495 the data. EM wrote the manuscript and AM and SS provided extensive comments. All  
39  
40 496 authors read and approved the final manuscript.

41  
42  
43 497 **Acknowledgements**

44  
45  
46 498 Thanks to the following for providing samples: Alison Taylor (Kippax Veterinary Hospital);  
47  
48 499 Kejun Wei (Australian National University); Sally Bryant, Elise Dewar and Michael Driessen  
49  
50  
51 500 (Department of Primary Industries, Parks, Water and Environment, Tasmania); Shane  
52  
53 501 McHugh (Tasmanian Land Conservancy); Judy Dunlop (Department of Parks and Wildlife,  
54  
55 502 Western Australia); Leo Joseph and Robert Palmer (Australian National Wildlife Collection,  
56  
57  
58  
59  
60  
61  
62  
63  
64  
65

503 CSIRO); Melissa Jensen (University of Adelaide); Catriona Campbell and Matthew Young  
1  
2  
3 504 (University of Canberra); Tony Buckmaster (University of Sydney); Shane Jackson (University  
4  
5 505 of Tasmania); Phil Newman (Rugosa Park Alpacas); Conrad Barr; The Australian Museum;  
6  
7 506 Museum Victoria; The Tasmanian Museum and Art Gallery; The Queen Victoria Museum and  
8  
9  
10 507 Art Gallery. Special thanks to Tony Buckmaster, Arthur Georges and members of the Invasive  
11  
12  
13 508 Animals CRC's 2016 Kioloa writing workshop as well as Stephen Harris for helpful  
14  
15 509 suggestions.

## 510 REFERENCES

- 21 511 [1] G. Ceballos, P. R. Ehrlich, A. D. Barnosky, A. García, R. M. Pringle, and T. M. Palmer,  
22 512 "Accelerated modern human-induced species losses: Entering the sixth mass extinction," *Sci.*  
23 513 *Adv.*, vol. 1, no. 5, p. e1400253, 2015.
- 26 514 [2] S. Boyer, S. D. J. Brown, R. A. Collins, R. H. Cruickshank, M.-C. Lefort, J. Malumbres-Olarte, S.  
27 515 D. Wratten, and K. A. Crandall, "Sliding window analyses for optimal selection of mini-  
28 516 barcodes, and application to 454-pyrosequencing for specimen identification from degraded  
29 517 DNA," *PLoS One*, vol. 7, no. 5, 2012.
- 32 518 [3] I. Meusnier, G. A. C. Singer, J.-F. Landry, D. A. Hickey, P. D. N. Hebert, and M. Hajibabaei, "A  
33 519 universal DNA mini-barcode for biodiversity analysis," *BMC Genomics*, vol. 9, no. 1, p. 214,  
34 520 2008.
- 37 521 [4] A. Alberdi, I. Garin, O. Aizpurua, and J. Aihartza, "The foraging ecology of the mountain long-  
38 522 eared bat *Plecotus macrobullaris* revealed with DNA mini-barcodes," *PLoS One*, vol. 7, no. 4,  
39 523 p. e35692, 2012.
- 41 524 [5] W. J. Kress, C. García-Robledo, M. Uriarte, and D. L. Erickson, "DNA barcodes for ecology,  
42 525 evolution, and conservation," *Trends Ecol. Evol.*, no. 0, 2015.
- 45 526 [6] O. Berry and S. D. Sarre, "Gel-free species identification using melt-curve analysis," *Mol. Ecol.*  
46 527 *Notes*, vol. 7, no. 1, pp. 1–4, 2007.
- 49 528 [7] T. M. Wilcox, K. S. McKelvey, M. K. Young, S. F. Jane, W. H. Lowe, A. R. Whiteley, and M. K.  
50 529 Schwartz, "Robust detection of rare species using environmental DNA: the importance of  
51 530 primer specificity," *PLoS One*, vol. 8, no. 3, p. e59520, 2013.
- 53 531 [8] H. C. Rees, B. C. Maddison, D. J. Middleditch, J. R. M. Patmore, and K. C. Gough, "REVIEW: The  
54 532 detection of aquatic animal species using environmental DNA—a review of eDNA as a survey  
55 533 tool in ecology," *J. Appl. Ecol.*, vol. 51, no. 5, pp. 1450–1459, 2014.
- 58 534 [9] O. Berry, S. D. Sarre, L. Farrington, and N. Aitken, "Faecal DNA detection of invasive species:  
59 535 The case of feral foxes in Tasmania," *Wildl. Res.*, vol. 34, no. 1, pp. 1–7, 2007.

- 536 [10] J. M. Korstian, A. M. Hale, V. J. Bennett, and D. A. Williams, "Using DNA barcoding to improve  
1 537 bat carcass identification at wind farms in the United States," *Conserv. Genet. Resour.*, pp. 1–  
2 538 8, 2015.  
3
- 4 539 [11] W. Shehzad, T. M. McCarthy, F. Pompanon, L. Purevjav, E. Coissac, T. Riaz, and P. Taberlet,  
5 540 "Prey preference of snow leopard (*Panthera uncia*) in South Gobi, Mongolia," *PLoS One*, vol.  
6 541 7, no. 2, p. e32104, 2012.  
7 542 [12] M. Koester, S. Claßen, and R. Gergs, "Establishment of group-specific PCR primers for the  
8 543 identification of freshwater macroinvertebrates," *Conserv. Genet. Resour.*, vol. 5, no. 4, pp.  
9 544 1091–1093, 2013.  
10 545 [13] S. K. Gupta and A. Kumar, "Molecular identification of man-eating carnivores from scat  
11 546 samples," *Conserv. Genet. Resour.*, vol. 6, no. 2, pp. 271–274, 2014.  
12 547 [14] F. Grattarola, S. González, and M. Cosse, "A novel primer set for mammal species  
13 548 identification from feces samples," *Conserv. Genet. Resour.*, vol. 7, no. 1, pp. 57–59, 2015.  
14 549 [15] C. Shores, S. Mondol, and S. K. Wasser, "Comparison of DNA and hair-based approaches to  
15 550 dietary analysis of free-ranging wolves (*Canis lupus*)," *Conserv. Genet. Resour.*, vol. 7, no. 4,  
16 551 pp. 871–878, 2015.  
17 552 [16] T. Takahara, T. Minamoto, and H. Doi, "Using environmental DNA to estimate the distribution  
18 553 of an invasive fish species in ponds," *PLoS One*, vol. 8, no. 2, p. e56584, 2013.  
19 554 [17] A. Fujiwara, S. Matsushashi, H. Doi, S. Yamamoto, and T. Minamoto, "Use of environmental  
20 555 DNA to survey the distribution of an invasive submerged plant in ponds," *Freshw. Sci.*, vol. 35,  
21 556 no. 2, p. 0, 2016.  
22 557 [18] B. E. Deagle, J. P. Eveson, and S. N. Jarman, "Quantification of damage in DNA recovered from  
23 558 highly degraded samples - A case study on DNA in faeces," *Front. Zool.*, vol. 3, 2006.  
24 559 [19] M. Hajibabaei, M. Smith, D. H. Janzen, J. J. Rodriguez, J. B. Whitfield, and P. D. N. Hebert, "A  
25 560 minimalist barcode can identify a specimen whose DNA is degraded," *Mol. Ecol. Notes*, vol. 6,  
26 561 no. 4, pp. 959–964, 2006.  
27 562 [20] A. Valentini, F. Pompanon, and P. Taberlet, "DNA barcoding for ecologists," *Trends Ecol. Evol.*,  
28 563 vol. 24, no. 2, pp. 110–117, 2009.  
29 564 [21] A. R. Bahrmann, H. Madani, V. V. Bakayev, M. H. Babaei, G. Samar, and V. Anashchenko,  
30 565 "Polymerase chain reaction of bacterial genomes with single universal primer: application to  
31 566 distinguishing mycobacteria species," *Mol. Cell. Probes*, vol. 10, no. 2, pp. 117–122, 1996.  
32 567 [22] R. Meier, K. Shiyang, G. Vaidya, and P. K. L. Ng, "DNA barcoding and taxonomy in Diptera: a  
33 568 tale of high intraspecific variability and low identification success," *Syst. Biol.*, vol. 55, no. 5,  
34 569 pp. 715–728, 2006.  
35 570 [23] R. Boutros, N. Stokes, M. Bekaert, and E. C. Teeling, "UniPrime2: a web service providing  
36 571 easier Universal Primer design," *Nucleic Acids Res.*, p. gkp269, 2009.

- 572 [24] E. M. Furlan, D. Gleeson, C. M. Hardy, and R. P. Duncan, "A framework for estimating the  
1 573 sensitivity of eDNA surveys," *Mol. Ecol. Resour.*, 2015.  
2  
3 574 [25] A. J. Macdonald and S. D. Sarre, "A framework for developing and validating taxon-specific  
4 575 primers for specimen identification from environmental DNA," *Mol. Ecol. Resour.*, 2016.  
5  
6  
7 576 [26] R. E. Wheat, J. M. Allen, S. D. L. Miller, C. C. Wilmers, and T. Levi, "Environmental DNA from  
8 577 residual saliva for efficient noninvasive genetic monitoring of brown bears (*Ursus arctos*),"  
9 578 *PLoS One*, vol. 11, no. 11, p. e0165259, 2016.  
10  
11  
12 579 [27] D. J. Morin, M. J. Kelly, and L. P. Waits, "Monitoring coyote population dynamics with fecal  
13 580 DNA and spatial capture–recapture," *J. Wildl. Manage.*, vol. 80, no. 5, pp. 824–836, 2016.  
14  
15 581 [28] J. C. Z. Woinarski, A. A. Burbidge, and P. L. Harrison, "Ongoing unraveling of a continental  
16 582 fauna: decline and extinction of Australian mammals since European settlement," *Proc. Natl.  
17 583 Acad. Sci.*, vol. 112, no. 15, pp. 4531–4540, 2015.  
18  
19  
20 584 [29] A. A. Burbidge and N. L. McKenzie, "Patterns in the modern decline of Western Australia's  
21 585 vertebrate fauna: causes and conservation implications," *Biol. Conserv.*, vol. 50, no. 1–4, pp.  
22 586 143–198, 1989.  
23  
24  
25 587 [30] A. P. Elkin, "Reaction and interaction: a food gathering people and European settlement in  
26 588 Australia," *Am. Anthropol.*, vol. 53, no. 2, pp. 164–186, 1951.  
27  
28  
29 589 [31] O. J. F. Brown, "Tasmanian devil (*Sarcophilus harrisii*) extinction on the Australian mainland in  
30 590 the mid-Holocene: multicausality and ENSO intensification," *Alcheringa An Australas. J.  
31 591 Palaeontol.*, vol. 30, no. S1, pp. 49–57, 2006.  
32  
33 592 [32] F. W. King, "Extant unless proven extinct: the international legal precedent," *Conserv. Biol.*,  
34 593 vol. 2, no. 4, pp. 395–397, 1988.  
35  
36  
37 594 [33] R. Paddle, *The last Tasmanian tiger: the history and extinction of the thylacine*. Cambridge  
38 595 University Press, 2002.  
39  
40  
41 596 [34] T. Hollings, M. Jones, N. Mooney, and H. McCallum, "Trophic Cascades Following the Disease-  
42 597 Induced Decline of an Apex Predator, the Tasmanian Devil," *Conserv. Biol.*, 2013.  
43  
44 598 [35] A. Brüniche-Olsen, C. P. Burridge, J. J. Austin, and M. E. Jones, "Disease induced changes in  
45 599 gene flow patterns among Tasmanian devil populations," *Biol. Conserv.*, vol. 165, pp. 69–78,  
46 600 2013.  
47  
48  
49 601 [36] H. S. Bender, J. A. Marshall Graves, and J. E. Deakin, "Pathogenesis and molecular biology of a  
50 602 transmissible tumor in the Tasmanian devil," *Annu. Rev. Anim. Biosci.*, vol. 2, no. 1, pp. 165–  
51 603 187, 2014.  
52  
53  
54 604 [37] S. Burnett, "Colonizing cane toads cause population declines in native predators: reliable  
55 605 anecdotal information and management implications," *Pacific Conserv. Biol.*, vol. 3, no. 1, p.  
56 606 65, 1997.  
57  
58  
59 607 [38] C. A. Belcher, "Demographics of tiger quoll (*Dasyurus maculatus maculatus*) populations in  
60 608 south-eastern Australia," *Aust. J. Zool.*, vol. 51, no. 6, pp. 611–626, Jan. 2003.

- 609 [39] A. S. Glen, P. J. de Tores, D. R. Sutherland, and K. D. Morris, "Interactions between chuditch  
 1 610 (Dasyurus geoffroii) and introduced predators: a review," *Australian Journal of Zoology*, vol.  
 2 611 57, no. 5. pp. 347–356, 2009.
- 3  
 4 612 [40] B. A. Fancourt, C. E. Hawkins, and S. C. Nicol, "Evidence of rapid population decline of the  
 5 613 eastern quoll (Dasyurus viverrinus) in Tasmania," *Aust. Mammal.*, vol. 35, no. 2, pp. 195–205,  
 6 614 2013.
- 7  
 8  
 9 615 [41] S. D. Sarre, A. J. Macdonald, C. Barclay, G. R. Saunders, and D. S. L. Ramsey, "Foxes are now  
 10 616 widespread in Tasmania: DNA detection defines the distribution of this rare but invasive  
 11 617 carnivore," *J. Appl. Ecol.*, vol. 50, no. 2, pp. 459–468, 2013.
- 12  
 13  
 14 618 [42] M. Nogales, A. Martín, B. R. Tershy, C. J. Donlan, D. Veitch, N. Puerta, B. Wood, and J. Alonso,  
 15 619 "A review of feral cat eradication on islands," *Conserv. Biol.*, vol. 18, no. 2, pp. 310–319, 2004.
- 16  
 17  
 18 620 [43] B. T. Lazenby, N. J. Mooney, and C. R. Dickman, "Effects of low-level culling of feral cats in  
 19 621 open populations: a case study from the forests of southern Tasmania," *Wildl. Res.*, vol. 41,  
 20 622 no. 5, pp. 407–420, 2015.
- 21  
 22  
 23 623 [44] A. R. Palumbi and F. Cipriano, "Species identification using genetic tools: the value of nuclear  
 24 624 and mitochondrial gene sequences in whale conservation," *J. Hered.*, vol. 89, no. 5, pp. 459–  
 25 625 464, 1998.
- 26  
 27 626 [45] D. M. Hillis, C. Moritz, B. K. Mable, and R. G. Olmstead, *Molecular systematics*, vol. 23. Sinauer  
 28 627 Associates Sunderland, MA, 1996.
- 29  
 30  
 31 628 [46] A. J. MacDonald and S. D. Sarre, "Species assignment from trace DNA sequences: an in silico  
 32 629 assessment of the test used to survey for foxes in Tasmania," *J. Appl. Ecol.*, p. n/a–n/a, Jul.  
 33 630 2015.
- 34  
 35  
 36 631 [47] S. D. J. Brown, R. A. Collins, S. Boyer, M. LEFORT, J. MALUMBRES-OLARTE, C. J. Vink, and R. H.  
 37 632 Cruickshank, "Spider: an R package for the analysis of species identity and evolution, with  
 38 633 particular reference to DNA barcoding," *Mol. Ecol. Resour.*, vol. 12, no. 3, pp. 562–565, 2012.
- 39  
 40  
 41 634 [48] P. A. Woolley, C. Krajewski, and M. Westerman, "Phylogenetic relationships within Dasyurus  
 42 635 (Dasyuromorphia: Dasyuridae): quoll systematics based on molecular evidence and male  
 43 636 characteristics," *J. Mammal.*, vol. 96, no. 1, pp. 37–46, Mar. 2015.
- 44  
 45 637 [49] M. K. Schwartz, G. Luikart, and R. S. Waples, "Genetic monitoring as a promising tool for  
 46 638 conservation and management," *Trends Ecol. Evol.*, vol. 22, no. 1, pp. 25–33, 2007.
- 47  
 48  
 49 639 [50] J. A. Darling and M. J. Blum, "DNA-based methods for monitoring invasive species: a review  
 50 640 and prospectus," *Biol. Invasions*, vol. 9, no. 7, pp. 751–765, 2007.
- 51  
 52  
 53 641 [51] A. D. Bastos, D. Nair, P. J. Taylor, H. Brettschneider, F. Kirsten, E. Mostert, E. Von Maltitz, J. M.  
 54 642 Lamb, P. Van Hooft, and S. R. Belmain, "Genetic monitoring detects an overlooked cryptic  
 55 643 species and reveals the diversity and distribution of three invasive Rattus congeners in South  
 56 644 Africa," *BMC Genet.*, vol. 12, no. 1, p. 1, 2011.
- 57  
 58  
 59 645 [52] C. L. Jerde, A. R. Mahon, W. L. Chadderton, and D. M. Lodge, "'Sight-unseen' detection of rare  
 60 646 aquatic species using environmental DNA," *Conserv. Lett.*, vol. 4, no. 2, pp. 150–157, 2011.

- 647 [53] N. Fernández, M. Delibes, and F. Palomares, "Landscape evaluation in conservation: molecular  
1 648 sampling and habitat modeling for the Iberian lynx," *Ecol. Appl.*, vol. 16, no. 3, pp. 1037–1049,  
2 649 2006.  
3
- 4 650 [54] K. S. McKelvey, J. V. O. N. KIENAST, K. B. Aubry, G. M. Koehler, B. T. Maletzke, J. R. Squires, E.  
5 651 L. Lindquist, S. Loch, and M. K. Schwartz, "DNA analysis of hair and scat collected along snow  
6 652 tracks to document the presence of Canada lynx," *Wildl. Soc. Bull.*, vol. 34, no. 2, pp. 451–455,  
7 653 2006.  
8 654 [55] R. Hausknecht, R. Gula, B. Pirga, and R. Kuehn, "Urine—a source for noninvasive genetic  
9 655 monitoring in wildlife," *Mol. Ecol. Notes*, vol. 7, no. 2, pp. 208–212, 2007.  
10
- 11 656 [56] Y.-C. Cheng and C.-P. Lin, "Dietary Niche Partitioning of *Euphaea formosa* and *Matrona*  
12 657 *cyanoptera* (Odonata: Zygoptera) on the Basis of DNA Barcoding of Larval Feces," *J. Insect Sci.*,  
13 658 vol. 16, no. 1, p. 73, 2016.  
14
- 15 659 [57] W. O. C. Symondson, "Molecular identification of prey in predator diets," *Mol. Ecol.*, vol. 11,  
16 660 no. 4, pp. 627–641, 2002.  
17
- 18 661 [58] S. N. Jarman, B. E. Deagle, and N. J. Gales, "Group-specific polymerase chain reaction for DNA-  
19 662 based analysis of species diversity and identity in dietary samples," *Mol. Ecol.*, vol. 13, no. 5,  
20 663 pp. 1313–22, May 2004.  
21
- 22 664 [59] B. E. Deagle, D. J. Tollit, S. N. Jarman, M. A. Hindell, A. W. Trites, and N. J. Gales, "Molecular  
23 665 scatology as a tool to study diet: analysis of prey DNA in scats from captive Steller sea lions,"  
24 666 *Mol. Ecol.*, vol. 14, no. 6, pp. 1831–1842, 2005.  
25
- 26 667 [60] K. Morris, B. Johnson, P. Orell, G. Gaikhorst, A. Wayne, and D. Moro, "Recovery of the  
27 668 threatened chuditch (*Dasyurus geoffroii*): a case study," *Predators with Pouches Biol. Carniv.*  
28 669 *Marsupials. CSIRO Publ. Melb.*, pp. 435–451, 2003.  
29
- 30 670 [61] Department of the Environment, "Western quolls – Reintroducing the species to the Flinders  
31 671 Ranges (SA)," 2015. [Online]. Available:  
32 672 [http://www.environment.gov.au/biodiversity/threatened/publications/factsheet-western-](http://www.environment.gov.au/biodiversity/threatened/publications/factsheet-western-quolls)  
33 673 [quolls](http://www.environment.gov.au/biodiversity/threatened/publications/factsheet-western-quolls).  
34
- 35 674 [62] S. Katsineris, "Endangered Quolls re-introduced to the flinders ranges," 2015.  
36
- 37 675 [63] E. Hunt, "Eastern quolls return to Australian mainland after more than 50 years," *The*  
38 676 *Guardian*, 02-Mar-2016.  
39
- 40 677 [64] A. S. Glen and C. R. Dickman, "Complex interactions among mammalian carnivores in  
41 678 Australia, and their implications for wildlife management," *Biol. Rev. Camb. Philos. Soc.*, vol.  
42 679 80, no. 3, pp. 387–401, 2005.  
43
- 44 680 [65] C. N. Johnson and J. VanDerWal, "Evidence that dingoes limit abundance of a mesopredator in  
45 681 eastern Australian forests," *J. Appl. Ecol.*, vol. 46, no. 3, pp. 641–646, 2009.  
46
- 47 682 [66] E. G. Ritchie and C. N. Johnson, "Predator interactions, mesopredator release and biodiversity  
48 683 conservation," *Ecol. Lett.*, vol. 12, pp. 982–998, 2009.  
49

- 684 [67] D. O. Hunter, T. Britz, M. Jones, and M. Letnic, "Reintroduction of Tasmanian devils to  
1 685 mainland Australia can restore top-down control in ecosystems where dingoes have been  
2 686 extirpated," *Biol. Conserv.*, vol. 191, pp. 428–435, 2015.  
3
- 4 687 [68] A. Di Finizio, G. Guerriero, G. L. Russo, and G. Ciarcia, "Identification of gadoid species (Pisces,  
5 688 Gadidae) by sequencing and PCR–RFLP analysis of mitochondrial 12S and 16S rRNA gene  
6 689 fragments," *Eur. Food Res. Technol.*, vol. 225, no. 3–4, pp. 337–344, 2007.  
8
- 9 690 [69] F. Pompanon, B. E. Deagle, W. O. C. Symondson, D. S. Brown, S. N. Jarman, and P. Taberlet,  
10 691 "Who is eating what: diet assessment using next generation sequencing.," *Mol. Ecol.*, vol. 21,  
11 692 no. 8, pp. 1931–50, Apr. 2012.  
13
- 14 693 [70] P. Taberlet, E. Coissac, F. Pompanon, C. Brochmann, and E. Willerslev, "Towards next-  
15 694 generation biodiversity assessment using DNA metabarcoding," *Mol. Ecol.*, vol. 21, no. 8, pp.  
16 695 2045–2050, 2012.  
18
- 19 696 [71] B. E. Deagle, S. N. Jarman, E. Coissac, F. Pompanon, and P. Taberlet, "DNA metabarcoding and  
20 697 the cytochrome c oxidase subunit I marker: not a perfect match," *Biol. Lett.*, vol. 10, no. 9, p.  
21 698 20140562, 2014.  
22
- 23 699 [72] "NCBI - National Center for Biotechnology Information." [Online]. Available:  
24 700 <http://www.ncbi.nlm.nih.gov/genbank/>. [Accessed: 19-Jan-2017].  
26
- 27 701 [73] L. Y. Geer, A. Marchler-Bauer, R. C. Geer, L. Han, J. He, S. He, C. Liu, W. Shi, and S. H. Bryant,  
28 702 "The NCBI biosystems database," *Nucleic Acids Res.*, p. gkp858, 2009.  
30
- 31 703 [74] K. E. Moseby, D. E. Peacock, and J. L. Read, "Catastrophic cat predation: A call for predator  
32 704 profiling in wildlife protection programs," *Biol. Conserv.*, vol. 191, pp. 331–340, 2015.  
33
- 34 705 [75] A. J. MacDonald, S. D. Sarre, N. N. FitzSimmons, and N. Aitken, "Determining microsatellite  
35 706 genotyping reliability and mutation detection ability: an approach using small-pool PCR from  
36 707 sperm DNA," *Mol. Genet. Genomics*, vol. 285, no. 1, pp. 1–18, 2011.  
38
- 39 708 [76] M. Kearse, R. Moir, A. Wilson, S. Stones-Havas, M. Cheung, S. Sturrock, S. Buxton, A. Cooper,  
40 709 S. Markowitz, and C. Duran, "Geneious Basic: an integrated and extendable desktop software  
41 710 platform for the organization and analysis of sequence data," *Bioinformatics*, vol. 28, no. 12,  
42 711 pp. 1647–1649, 2012.  
44
- 45 712 [77] M. S. Springer, L. J. Hollar, and A. Burk, "Compensatory substitutions and the evolution of the  
46 713 mitochondrial 12S rRNA gene in mammals.," *Mol. Biol. Evol.*, vol. 12, no. 6, pp. 1138–1150,  
47 714 Nov. 1995.  
49
- 50 715 [78] D. S. L. Ramsey, A. J. MacDonald, S. Quasim, C. Barclay, and S. D. Sarre, "An examination of  
51 716 the accuracy of a sequential PCR and sequencing test used to detect the incursion of an  
52 717 invasive species: the case of the red fox in Tasmania," *J. Appl. Ecol.*, vol. 52, no. 3, pp. 562–  
53 718 570, 2015.  
55
- 56 719  
57  
58  
59 720  
60  
61  
62  
63  
64  
65

16  
17  
18  
19  
20  
21  
22  
23  
24  
25  
26  
27  
28  
29  
30  
31  
32  
33  
34  
35  
36  
37  
38  
39  
40  
41  
42  
43  
44  
45  
46  
47  
48  
49  
50  
51  
52  
53  
54  
55  
56  
57  
58  
59  
60  
61  
62  
63  
64  
65

721 **TABLE**

722 Table 3: PCR and DNA sequencing results from 57 known-origin scat samples screened using the *AusPreda\_12S* mini-barcode.

| Sample    | Scientific name               | Common name          | Amplified | Sequenced | Closest sequence match using BLAST | % ID <sup>α</sup> | e value <sup>β</sup> |
|-----------|-------------------------------|----------------------|-----------|-----------|------------------------------------|-------------------|----------------------|
| 100111-27 | <i>Canis lupus familiaris</i> | Dog                  | Y         | Y         | Dog                                | 99.4              | 1.55E-84             |
| 120111-02 | <i>Canis lupus familiaris</i> | Dog                  | Y         | Y         | Dog                                | 100               | 6.52E-78             |
| 121010-11 | <i>Canis lupus familiaris</i> | Dog                  | Y         | Y         | Dog                                | 99.4              | 1.22E-85             |
| 121010-16 | <i>Canis lupus familiaris</i> | Dog                  | Y         | Y         | Dog                                | 98.4              | 2.08E-83             |
| 121010-17 | <i>Canis lupus familiaris</i> | Dog                  | Y         | Y         | Dog                                | 99.4              | 1.98E-83             |
| 121010-30 | <i>Canis lupus familiaris</i> | Dog                  | Y         | Y         | Dog                                | 99.4              | 5.54E-84             |
| 121010-52 | <i>Canis lupus familiaris</i> | Dog                  | Y         | <b>N</b>  | <b>NA</b>                          | <b>NA</b>         | <b>NA</b>            |
| 121010-53 | <i>Canis lupus familiaris</i> | Dog                  | Y         | Y         | Dog                                | 98.9              | 2.60E-82             |
| 121010-54 | <i>Canis lupus familiaris</i> | Dog                  | Y         | Y         | Dog                                | 99.4              | 1.22E-85             |
| 121010-56 | <i>Canis lupus familiaris</i> | Dog                  | Y         | Y         | Dog                                | 98.9              | 7.22E-83             |
| 121110-55 | <i>Canis lupus familiaris</i> | Dog                  | Y         | Y         | Dog                                | 99.4              | 5.54E-84             |
| 170211-12 | <i>Canis lupus familiaris</i> | Dog                  | <b>N</b>  | <b>NA</b> | <b>NA</b>                          | <b>NA</b>         | <b>NA</b>            |
| 041110-66 | <i>Dasyurus maculatus</i>     | Spotted-tailed quoll | Y         | Y         | Spotted-tailed quoll               | 98.4              | 2.08E-83             |
| 101110-9  | <i>Dasyurus maculatus</i>     | Spotted-tailed quoll | Y         | Y         | Spotted-tailed quoll               | 98.2              | 2.33E-72             |
| 170211-25 | <i>Dasyurus maculatus</i>     | Spotted-tailed quoll | Y         | Y         | Spotted-tailed quoll               | 99.4              | 1.55E-84             |
| 041110-01 | <i>Dasyurus viverrinus</i>    | Eastern quoll        | Y         | Y         | Eastern quoll                      | 99.4              | 2.25E-72             |
| 041110-04 | <i>Dasyurus viverrinus</i>    | Eastern quoll        | Y         | Y         | Eastern quoll                      | 100               | 2.05E-88             |
| 041110-07 | <i>Dasyurus viverrinus</i>    | Eastern quoll        | Y         | Y         | Eastern quoll                      | 100               | 4.80E-74             |
| 041110-15 | <i>Dasyurus viverrinus</i>    | Eastern quoll        | Y         | Y         | Eastern quoll                      | 100               | 1.01E-54             |
| 041110-74 | <i>Dasyurus viverrinus</i>    | Eastern quoll        | Y         | Y         | Eastern quoll                      | 100               | 1.19E-85             |
| 041110-80 | <i>Dasyurus viverrinus</i>    | Eastern quoll        | Y         | Y         | Eastern quoll                      | 100               | 9.34E-87             |
| 100111-05 | <i>Dasyurus viverrinus</i>    | Eastern quoll        | Y         | Y         | Eastern quoll                      | 100               | 3.34E-86             |
| 100111-31 | <i>Dasyurus viverrinus</i>    | Eastern quoll        | Y         | Y         | Eastern quoll                      | 100               | 3.34E-86             |



16  
17  
18  
19  
20  
21  
22  
23  
24  
25  
26  
27  
28  
29  
30  
31  
32  
33  
34  
35  
36  
37  
38  
39  
40  
41  
42  
43  
44  
45  
46  
47  
48  
49  
50  
51  
52  
53  
54  
55  
56  
57  
58  
59  
60  
61  
62  
63  
64  
65

|           |                             |                 |          |           |                 |           |           |
|-----------|-----------------------------|-----------------|----------|-----------|-----------------|-----------|-----------|
| 120111-32 | <i>Dasyurus viverrinus</i>  | Eastern quoll   | <b>N</b> | <b>NA</b> | <b>NA</b>       | <b>NA</b> | <b>NA</b> |
| 120111-33 | <i>Dasyurus viverrinus</i>  | Eastern quoll   | Y        | Y         | Eastern quoll   | 100       | 2.61E-87  |
| 170211-14 | <i>Dasyurus viverrinus</i>  | Eastern quoll   | Y        | Y         | Eastern quoll   | 100       | 2.61E-87  |
| 100111-04 | <i>Felis catus</i>          | Feral cat       | Y        | Y         | Feral cat       | 100       | 1.54E-79  |
| 120111-10 | <i>Felis catus</i>          | Feral cat       | Y        | Y         | Feral cat       | 100       | 1.56E-79  |
| 120111-12 | <i>Felis catus</i>          | Feral cat       | Y        | Y         | Feral cat       | 100       | 1.58E-79  |
| 120111-31 | <i>Felis catus</i>          | Feral cat       | Y        | <b>N</b>  | <b>NA</b>       | <b>NA</b> | <b>NA</b> |
| 170211-13 | <i>Felis catus</i>          | Feral cat       | Y        | Y         | Feral cat       | 99.2      | 3.36E-60  |
| 170211-21 | <i>Felis catus</i>          | Feral cat       | Y        | Y         | Feral cat       | 100       | 1.61E-79  |
| 170211-22 | <i>Felis catus</i>          | Feral cat       | Y        | Y         | Feral cat       | 100       | 1.55E-79  |
| 041110-42 | <i>Sarcophilus harrisii</i> | Tasmanian devil | Y        | Y         | Tasmanian devil | 100       | 4.02E-80  |
| 041110-47 | <i>Sarcophilus harrisii</i> | Tasmanian devil | Y        | Y         | Tasmanian devil | 100       | 9.34E-87  |
| 041110-48 | <i>Sarcophilus harrisii</i> | Tasmanian devil | Y        | Y         | Tasmanian devil | 100       | 2.61E-87  |
| 041110-53 | <i>Sarcophilus harrisii</i> | Tasmanian devil | Y        | Y         | Tasmanian devil | 100       | 2.47E-82  |
| 041110-59 | <i>Sarcophilus harrisii</i> | Tasmanian devil | Y        | Y         | Tasmanian devil | 100       | 7.32E-88  |
| 121010-06 | <i>Sarcophilus harrisii</i> | Tasmanian devil | Y        | Y         | Tasmanian devil | 100       | 4.02E-80  |
| 121010-22 | <i>Sarcophilus harrisii</i> | Tasmanian devil | Y        | Y         | Tasmanian devil | 99.4      | 5.58E-84  |
| 200910-24 | <i>Sarcophilus harrisii</i> | Tasmanian devil | Y        | Y         | Tasmanian devil | 100       | 9.34E-87  |
| 200910-25 | <i>Sarcophilus harrisii</i> | Tasmanian devil | Y        | Y         | Tasmanian devil | 100       | 2.61E-87  |
| 080211-04 | <i>Vulpes vulpes</i>        | Red fox         | Y        | Y         | Red fox         | 99.4      | 1.22E-85  |
| 080211-05 | <i>Vulpes vulpes</i>        | Red fox         | Y        | Y         | Red fox         | 99.4      | 5.54E-84  |
| 080211-06 | <i>Vulpes vulpes</i>        | Red fox         | Y        | <b>N</b>  | <b>NA</b>       | <b>NA</b> | <b>NA</b> |
| 080211-07 | <i>Vulpes vulpes</i>        | Red fox         | Y        | Y         | Red fox         | 97.2      | 9.35E-61  |
| 080211-08 | <i>Vulpes vulpes</i>        | Red fox         | Y        | Y         | Red fox         | 99.4      | 5.54E-84  |
| 080211-09 | <i>Vulpes vulpes</i>        | Red fox         | <b>N</b> | <b>NA</b> | <b>NA</b>       | <b>NA</b> | <b>NA</b> |
| 080211-10 | <i>Vulpes vulpes</i>        | Red fox         | Y        | Y         | Red fox         | 100       | 6.52E-78  |
| 080211-11 | <i>Vulpes vulpes</i>        | Red fox         | Y        | Y         | Red fox         | 98.9      | 5.66E-84  |

15  
16  
17  
18  
19  
20  
21  
22  
23  
24  
25  
26  
27  
28  
29  
30  
31  
32  
33  
34  
35  
36  
37  
38  
39  
40  
41  
42  
43  
44  
45  
46  
47  
48  
49  
50  
51  
52  
53  
54  
55  
56  
57  
58  
59  
60  
61  
62  
63  
64  
65

|           |                      |         |          |           |           |           |           |
|-----------|----------------------|---------|----------|-----------|-----------|-----------|-----------|
| 080211-12 | <i>Vulpes vulpes</i> | Red fox | Y        | <b>N</b>  | <b>NA</b> | <b>NA</b> | <b>NA</b> |
| 080211-13 | <i>Vulpes vulpes</i> | Red fox | Y        | Y         | Red fox   | 98.8      | 3.99E-75  |
| 080211-14 | <i>Vulpes vulpes</i> | Red fox | Y        | Y         | Red fox   | 100       | 6.52E-78  |
| 080211-15 | <i>Vulpes vulpes</i> | Red fox | Y        | Y         | Red fox   | 99.1      | 2.63E-50  |
| 080211-16 | <i>Vulpes vulpes</i> | Red fox | Y        | Y         | Red fox   | 100       | 6.52E-78  |
| 080211-17 | <i>Vulpes vulpes</i> | Red fox | <b>N</b> | <b>NA</b> | <b>NA</b> | <b>NA</b> | <b>NA</b> |
| 080211-18 | <i>Vulpes vulpes</i> | Red fox | Y        | Y         | Red fox   | 97.8      | 1.23E-80  |

723 <sup>α</sup> % ID is the percentage pairwise identity between the query sequence and the matching sequence identified using BLAST.

724 <sup>β</sup> The e-value represents the number of BLAST hits expected by chance. The lower the e-value is, the better.

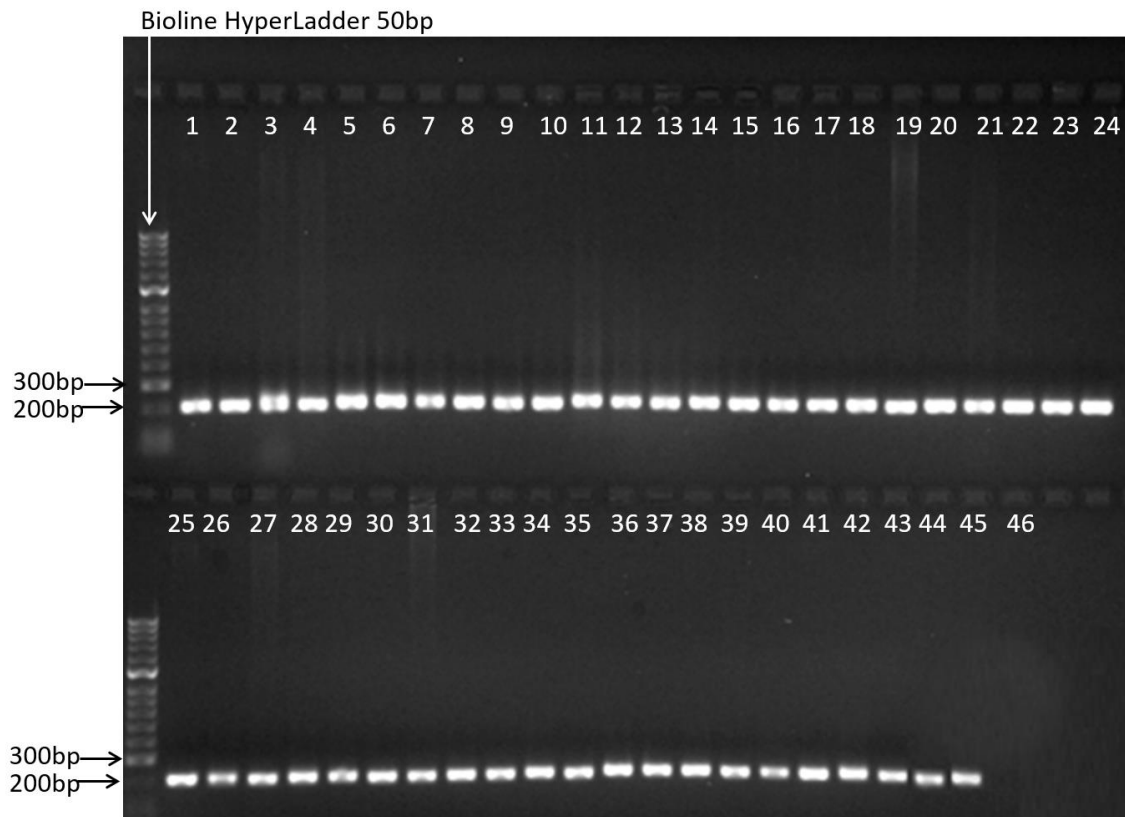

Figure 1: Gel showing amplification success from 45 known tissue samples representing 40 species, using the *AusPreda\_12S* mini-barcode primers developed in this study, and a PCR negative. The expected amplicon size is 218bp. Samples are grouped by species as follows: lanes 1 and 2: *Felis catus*, 3: *Canis lupus familiaris*, 4: *Canis lupus dingo*, 5 and 6: *Dasyurus viverrinus*, 7 and 8: *Dasyurus maculatus*, 9 and 10: *Vulpes vulpes*, 11 and 12: *Sarcophilus harrisii*, 13: *Oryctolagus cuniculus*, 14: *Lepus capensis*, 15: *Bos Taurus*, 16: *Ornithorhyncus anatinus*, 17: *Trichosorus vulpecula*, 18: *Petaurus breviceps*, 19: *Tachyglossus aculeatus*, 20: *Potorous tridactylus*, 21: *Bettongia gaimardi*, 22: *Dactylopsila trivirgata*, 23: *Burramys parvus*, 24: *Macropus rufogriseus*, 25: *Thylogale billardierii*, 26: *Pseudomys gracilicaudatus*, 27: *Pseudocheirus peregrinus*, 28: *Antechinus minimus*, 29: *Tiliqua nigrolutea*, 30: *Vombatus ursinus*, 31: *Isoodon obesulus*, 32: *Macropus giganteus*, 33: *Parameles gunnii*, 34: *Sminthopsis leucopus*, 35: *Mus musculus*, 36: *Planigale gilesi*, 37: *Rattus lutreolus velutinus*, 38: *Phascogale tapoatafa*, 39: *Hydromys chrysogaster*, 40: *Macropus rufus*, 41: *Vicugna pacos*, 42: *Dasyurus hallucatus*, 43: *Lathamus discolour*, 44: *Geocrinia laevis*, 45: *Dasyurus geoffroii*, 46: PCR negative.

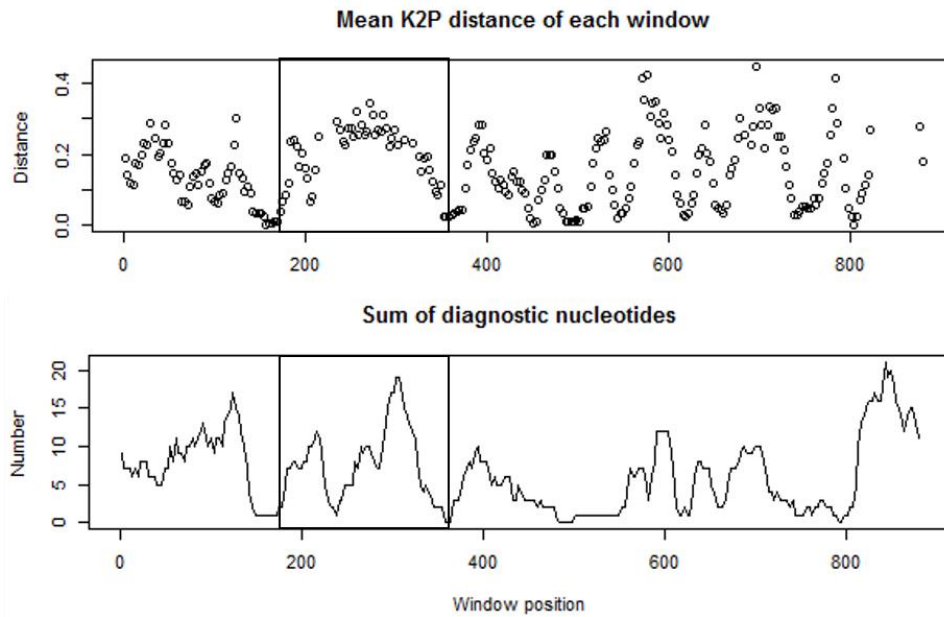

Figure 2: Results of the sliding window analysis conducted using the R package SPIDER for the 12S rRNA gene using a window size of 20 bp. The upper panel displays the mean K2P distance calculated for each 20 bp window. K2P distances are a measure of genetic differentiation among species, with K2P values represented on the y-axis. The lower panel displays the number of diagnostic nucleotides among species identified within each 20 bp window. In both cases, the x-axis represents the position of each window in the alignment. The area boxed in each panel indicates the best candidate site for a short diagnostic amplicon flanked by conserved primer sites, between nucleotides 160bp and 380bp of the alignment.

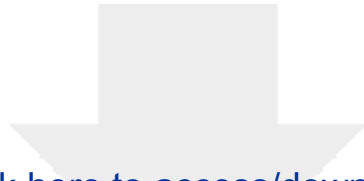

[Click here to access/download](#)

**Supplementary Material**

[Additional\\_file\\_1\\_12S\\_Database\\_sequences.fasta](#)

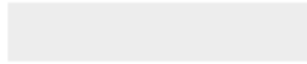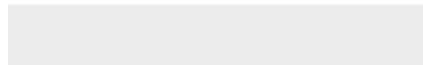



[Click here to access/download](#)

**Supplementary Material**

[Additional\\_file\\_2\\_12S\\_Database\\_samples.csv](#)

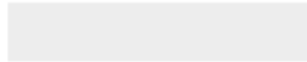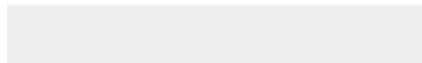

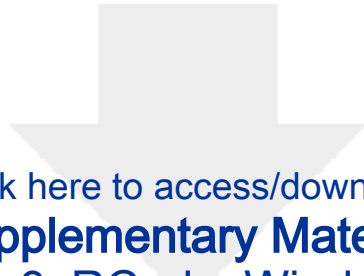

[Click here to access/download](#)

**Supplementary Material**

[Additional\\_file\\_3\\_RCode\\_Window\\_analysis.txt](#)

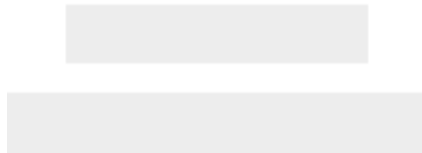



Click here to access/download

**Supplementary Material**

[Additional\\_file\\_4\\_FULL\\_Database.fasta](#)

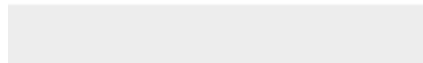



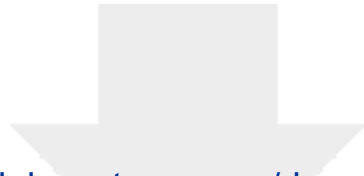

[Click here to access/download](#)

**Supplementary Material**

[Additional\\_file\\_5\\_UNIQUE\\_Database.fasta](#)





Click here to access/download  
**Supplementary Material**  
Additional\_file\_6\_RCode\_Tests.txt





Click here to access/download

**Supplementary Material**

[Additional\\_file\\_7\\_GeneticDistanceEvaluation\\_Results.cs](#)

v



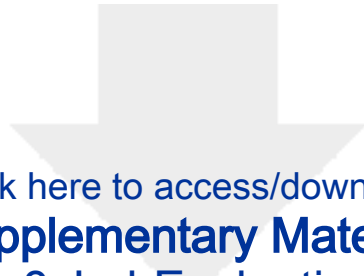

[Click here to access/download](#)

**Supplementary Material**

[Additional\\_file\\_8\\_LabEvaluation\\_Samples.csv](#)

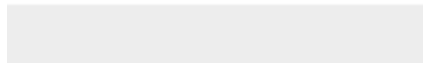

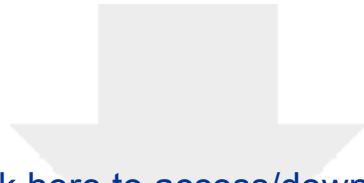

[Click here to access/download](#)

**Supplementary Material**

[Additional\\_file\\_9\\_KnownScat\\_sequences.fasta](#)

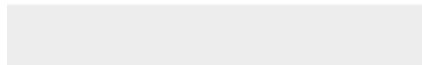

Supplement: gix052_giga-d-17-00051_original-submission.pdf [file gix052_giga-d-17-00051_original-submission.pdf]
