# Supplementary material for: A single mini-barcode test to screen for Australian mammalian predators from environmental samples
Source: PubMed Central journal article supplement (PMC5545080; doi:10.1093/gigascience/gix052), 2017-07-04

## A single mini-barcode test to screen for Australian mammalian predators from environmental samples

--Manuscript Draft--

|                                                      |                                                                                                                                                                                                                                                                                                                                                                                                                                                                                                                                                                                                                                                                                                                                                                                                                                                                                                                                                                                                                                                                                                                                                                                                                                                                                                                                                                                                                                                                                                                                                                                                                                                                    |                    |
|------------------------------------------------------|--------------------------------------------------------------------------------------------------------------------------------------------------------------------------------------------------------------------------------------------------------------------------------------------------------------------------------------------------------------------------------------------------------------------------------------------------------------------------------------------------------------------------------------------------------------------------------------------------------------------------------------------------------------------------------------------------------------------------------------------------------------------------------------------------------------------------------------------------------------------------------------------------------------------------------------------------------------------------------------------------------------------------------------------------------------------------------------------------------------------------------------------------------------------------------------------------------------------------------------------------------------------------------------------------------------------------------------------------------------------------------------------------------------------------------------------------------------------------------------------------------------------------------------------------------------------------------------------------------------------------------------------------------------------|--------------------|
| <b>Manuscript Number:</b>                            | GIGA-D-17-00051R1                                                                                                                                                                                                                                                                                                                                                                                                                                                                                                                                                                                                                                                                                                                                                                                                                                                                                                                                                                                                                                                                                                                                                                                                                                                                                                                                                                                                                                                                                                                                                                                                                                                  |                    |
| <b>Full Title:</b>                                   | A single mini-barcode test to screen for Australian mammalian predators from environmental samples                                                                                                                                                                                                                                                                                                                                                                                                                                                                                                                                                                                                                                                                                                                                                                                                                                                                                                                                                                                                                                                                                                                                                                                                                                                                                                                                                                                                                                                                                                                                                                 |                    |
| <b>Article Type:</b>                                 | Research                                                                                                                                                                                                                                                                                                                                                                                                                                                                                                                                                                                                                                                                                                                                                                                                                                                                                                                                                                                                                                                                                                                                                                                                                                                                                                                                                                                                                                                                                                                                                                                                                                                           |                    |
| <b>Funding Information:</b>                          | Invasive Animals Cooperative Research Centre<br>(Project 1.L.21)                                                                                                                                                                                                                                                                                                                                                                                                                                                                                                                                                                                                                                                                                                                                                                                                                                                                                                                                                                                                                                                                                                                                                                                                                                                                                                                                                                                                                                                                                                                                                                                                   | Miss Elodie Modave |
| <b>Abstract:</b>                                     | <p>Background: Identification of species from trace samples is now possible through the comparison of diagnostic DNA fragments against reference DNA sequence databases. DNA detection of animals from non-invasive samples, such as predator faeces (scats) that contain traces of DNA from their species of origin, has proved to be a valuable tool for management of elusive wildlife. However, application of this approach can be limited by the availability of appropriate genetic markers. Scat DNA is often degraded, meaning that longer DNA sequences, including standard DNA barcoding markers, are difficult to recover. Instead, targeted short diagnostic markers are required to serve as diagnostic mini-barcodes. The mitochondrial genome is a useful source of such trace DNA markers, because it provides good resolution at species level and occurs in high copy numbers per cell.</p> <p>Results: We developed a mini-barcode, based on a short (178 bp) fragment of the conserved 12S rRNA mitochondrial gene sequence, with the goal of discriminating amongst the scats of large mammalian predators of Australia. We tested the sensitivity and specificity of our primers and can accurately detect and discriminate amongst quolls, cats, dogs, foxes and devils from trace DNA samples.</p> <p>Conclusions: Our approach provides a cost effective, time efficient and non-invasive tool that enables identification of all eight medium-large mammal predators in Australia, including native and introduced species, using a single test. With modification, this approach is likely to be of broad applicability elsewhere.</p> |                    |
| <b>Corresponding Author:</b>                         | Elodie Modave<br>University of Canberra<br>AUSTRALIA                                                                                                                                                                                                                                                                                                                                                                                                                                                                                                                                                                                                                                                                                                                                                                                                                                                                                                                                                                                                                                                                                                                                                                                                                                                                                                                                                                                                                                                                                                                                                                                                               |                    |
| <b>Corresponding Author Secondary Information:</b>   |                                                                                                                                                                                                                                                                                                                                                                                                                                                                                                                                                                                                                                                                                                                                                                                                                                                                                                                                                                                                                                                                                                                                                                                                                                                                                                                                                                                                                                                                                                                                                                                                                                                                    |                    |
| <b>Corresponding Author's Institution:</b>           | University of Canberra                                                                                                                                                                                                                                                                                                                                                                                                                                                                                                                                                                                                                                                                                                                                                                                                                                                                                                                                                                                                                                                                                                                                                                                                                                                                                                                                                                                                                                                                                                                                                                                                                                             |                    |
| <b>Corresponding Author's Secondary Institution:</b> |                                                                                                                                                                                                                                                                                                                                                                                                                                                                                                                                                                                                                                                                                                                                                                                                                                                                                                                                                                                                                                                                                                                                                                                                                                                                                                                                                                                                                                                                                                                                                                                                                                                                    |                    |
| <b>First Author:</b>                                 | Elodie Modave                                                                                                                                                                                                                                                                                                                                                                                                                                                                                                                                                                                                                                                                                                                                                                                                                                                                                                                                                                                                                                                                                                                                                                                                                                                                                                                                                                                                                                                                                                                                                                                                                                                      |                    |
| <b>First Author Secondary Information:</b>           |                                                                                                                                                                                                                                                                                                                                                                                                                                                                                                                                                                                                                                                                                                                                                                                                                                                                                                                                                                                                                                                                                                                                                                                                                                                                                                                                                                                                                                                                                                                                                                                                                                                                    |                    |
| <b>Order of Authors:</b>                             | Elodie Modave                                                                                                                                                                                                                                                                                                                                                                                                                                                                                                                                                                                                                                                                                                                                                                                                                                                                                                                                                                                                                                                                                                                                                                                                                                                                                                                                                                                                                                                                                                                                                                                                                                                      |                    |
|                                                      | Anna Jayne MacDonald, BSc, PhD                                                                                                                                                                                                                                                                                                                                                                                                                                                                                                                                                                                                                                                                                                                                                                                                                                                                                                                                                                                                                                                                                                                                                                                                                                                                                                                                                                                                                                                                                                                                                                                                                                     |                    |
|                                                      | Stephen Donald Sarre, BAppSc, MAppSc, PhD                                                                                                                                                                                                                                                                                                                                                                                                                                                                                                                                                                                                                                                                                                                                                                                                                                                                                                                                                                                                                                                                                                                                                                                                                                                                                                                                                                                                                                                                                                                                                                                                                          |                    |
| <b>Order of Authors Secondary Information:</b>       |                                                                                                                                                                                                                                                                                                                                                                                                                                                                                                                                                                                                                                                                                                                                                                                                                                                                                                                                                                                                                                                                                                                                                                                                                                                                                                                                                                                                                                                                                                                                                                                                                                                                    |                    |
| <b>Response to Reviewers:</b>                        | <p>Responses to the reviewers<br/>all the changes in the text are highlighted in yellow and the line numbers where the changes occurred are noted in the "responses" part of the table below</p> <p>reviewer 1: Andrea Galimberti</p> <p>- ROWS 111-114: Use "region" instead of "sequence" and the sentence is quite</p>                                                                                                                                                                                                                                                                                                                                                                                                                                                                                                                                                                                                                                                                                                                                                                                                                                                                                                                                                                                                                                                                                                                                                                                                                                                                                                                                          |                    |

redundant and somewhat circular. I suggest to rephrase it.

- yes, I agree. I made the sentence shorter. Lines 118-120

- TABLE 1: It is unclear, which criteria were used to adopt the two threshold values. Maybe the authors can calculate a sort of optimum threshold due to minimum cumulative error rate (see Ferri et al. 2009 DOI: 10.1186/1742-9994-6-1 or Galimberti et al. 2012 <http://dx.doi.org/10.1371/journal.pone.0040122>)

- That is what we did, it is based on the thresholds with the lowest cumulative error. I modified the legend to make it clearer.  
Lines 193-196

This can be found in the method section, in "Bioinformatic evaluation of the mini-barcode" (lines 454-456) and it is calculated in the additional file 6 for the R code in the section "MODEL" "# Identify the optimal genetic distance threshold for the raw model for "FULL"- "UNIQUE" "

- ROWS 260-262: This is an important point. What contingency plan the authors propose to overcome this limit? It is unclear from the text.

- I have added "In practice, any such sequences cannot be used to identify the predator with confidence and therefore must be excluded from analysis."  
Lines 293-295

- I also think that the recent review by Galimberti and colleagues (DOI: <http://dx.doi.org/10.4404/hystrix-26.1-11347>) concerning DNA barcoding on mammalian taxa should be cited.

- thank you for this paper. I included a citation in the "conservation implications" part of the "Discussion" section. I indeed developed this mini-barcode for a management and monitoring purpose thus for a broader application than the "simple" identification purpose. Line 347

reviewer 2: Stephane Boyer

- It is interesting to see that a more relaxed genetic distance threshold may be more appropriate (line 201). The authors used the default 1% threshold in the functions bestCloseMatch and threshID. They seem to base this decision on the graphical representation of threshID (code below).

```
>barplot(t(threshfullMat) [4:5,],  
>names.arg=paste((threshfullMat[,1]*100), "%"))
```

The visual reading of this barplot gives some indication of how many false positives/negatives the user may have to tolerate. However, this is somewhat a crude measure of the optimal threshold. A better option is to use the localMinima function in SPIDER, which calculates the most appropriate threshold to use for a given dataset based on pairwise distances only. When running this function on the full dataset (see code below), I obtained a threshold of 0.0335 which seems more appropriate for the data. The authors may want to re-visit their analysis based on that threshold (instead of 1%).

```
>#local minima calculation of optimal species delineation threshold  
>Thresh <- localMinima(fullIDist) #Compute the localMinima function  
>#Results: 0.0335 ; 0.195  
>plot(Thresh, main="localMinima 12S FULL")
```

If the authors choose to use the localMinima function, the optimal threshold should be calculated using the Unique dataset only. As it is not possible to calculate an accurate threshold with this function using singletons only.

- The reviewer is correct, I chose 1% for the FULL database and 4% for the UNIQUE database based on the code lowest cumulative error.

I have not used localMinima, and I thank the reviewer for making us aware of this option. However, this does not seem to provide a sensible output for the unique database in this instance.

As suggested, I have used a threshold of 3.5% (rounding up the localMinima result of 0.335) for the full database. I have incorporated this into the analysis by comparing

results using thresholds of 1% and 3.5%. For example, using best close match, The higher threshold results in a greater number of correct identifications, but also a greater number of incorrect identification. In contrast a 1% threshold has a higher number of “no ID” results. I have amended the discussion to note that the most appropriate threshold will depend on the management context, and the relative importance of false positive identifications / unidentified samples.

The results for the unique database using localMinima are more problematic.

Using

```
uniThresh <- localMinima(uniqueDist)
```

```
uniThresh$localMinima[1] *100
```

```
plot(uniThresh)
```

the threshold identified is 19%, which seems extremely high in this context. While this threshold does produce perfect results (all samples correctly identified with best close match / threshID) using our unique dataset, my concern is that sequences from taxa that are not well represented in our database will be at a much greater risk of misidentification with such a relaxed threshold. Hopefully as more reference sequences become available from a wider range of Australian mammals it will be possible to improve this analysis. However, in the meantime I would argue that in most management contexts it would be better for a sample to be ambiguously identified, or to have “no ID” than to be incorrectly identified. For example, working with the full database, I see the following results using best close match with thresholds of 1% and 3.5%

```
> table(bestCloseMatch(fullDist, Sppfull, thresh = 0.01))
```

```
correct incorrect  no id
   147      3    24
```

```
> table(bestCloseMatch(fullDist, Sppfull, thresh = 0.035))
```

```
correct incorrect  no id
   152      6    16
```

And using threshID with the same thresholds I get:

```
> table(threshID(fullDist, Sppfull, thresh = 0.01))
```

```
ambiguous correct incorrect  no id
    5    142     3    24
```

```
> table(threshID(fullDist, Sppfull, thresh = 0.035))
```

```
ambiguous correct incorrect  no id
    12    141     5    16
```

To improve consistency between the two sets of results, I have also amended the text so that analyses with the unique database also use a threshold of 3.5%. This has the same cumulative error as a threshold of 4% (which is what was previously used) and the results are not affected by this change.

text added

Methods: lines 456 + 461-462

Results: lines 183-186, 193-196, 201-202, 216-231

Discussion: lines 319-323

Table 1, Additional file 6, Additional file 7

- I can only commend the authors for providing the annotated R code. The main code works well and is easy to follow. The very last line of code seems incomplete. I think it misses a closing bracket at the very end and another line to query a sequence (as written below)

```
>}
```

```
>withinF[[1141]]
```

- The reviewer is correct that the code should end this way. However, in my version of the file this text is not missing.

I have uploaded the file again to make sure that there are no errors.

- I was a little confused with the code for sliding window analysis. I don't understand why the window width was set on 20 bp and why only this particular length was investigated. The authors seem to have used the sliding window analysis to determine the position of potential primers, rather than the position of a suitable mini-barcode region (which was the original purpose of sliding window). If that is the case, then I suppose suitable 'primer windows' must be highly conserved, but what were the other criterion used to select them? It reads as follow on line 343: "...regions up to 200 bp in length, incorporating two primer sites (each of 20 bp in length) that were well-

conserved across all taxa but which flanked a region of 100-200 bp that displayed high levels of interspecific variation" What is the threshold for 'well conserved'? What is considered 'high levels of interspecific variation'? Are these based on values obtained from the sliding window analysis?

I would have expected that a range of length, for example from 50 bp up to 200 bp, would have been investigated with the aim of determining the shortest possible mini-barcode region. For example, I ran a sliding window analysis using a width of 150 bp (see code below modified from the authors').

```
>a12SWin <- slidingWindow(a12Sref, width = 150, interval=1)
>length(a12SWin)
>a12SWin[[1]]
>a12SAana <- slideAnalyses(a12Sref, Sppa12S, width = 150, interval =
>"codons", distMeasures = TRUE, treeMeasures = TRUE)
>str(a12SAana)
>plot(a12SAana)
```

Useful variables provided by the sliding window function includes the 'proportion of zero non-conspecific K2P distances'. When this value is 0, the window has enough identification power to tell all species apart. All 150 bp windows starting on base ~90 to ~240 are good picks in this regard. So I do believe the chosen region is probably a good one. But it is unclear why the window starting on position 160 was deemed the best window by the authors

- I agree that this section was unclear and I have amended the manuscript to include more detail. I thank the reviewer for these comments as these have helped to improve my explanation and interpretation.

I did indeed use a wider range of window sizes. I first used larger window sizes (100-175bp) to identify potential mini barcode regions. I then used the shorter window sizes (20-30 bp) to identify conserved sites suitable for primer development within the region of the candidate mini-barcode. The combination of both of these factors (a highly diagnostic sequence and conserved primer sites) are crucial for effective barcode design and adjusting the sliding windows analysis seemed like a good way to identify primer sites.

Using larger windows, I identified regions that may have been good candidate mini-barcode, except that it was not clear that suitable primer sites were present. By restricting the window size, I was able to clearly identify highly conserved primers as well as the diagnostic mini-barcode regions.

While the broader region (90-240bp) identified by the reviewer using 150bp windows could certainly serve as a mini-barcode, my choice of starting position was driven by the identification of a suitable forward primer sequence, and also with the final length of the amplicon in mind given the location of a suitable reverse primer. While the region from 90 bp is identified as a potential mini-barcode using a window size of 150, I also found a good region between bases ~160-~380. Considering just the smaller window size (for primer design), the region around base 160 was a suitable primer site.

I have updated the text to clarify this and to better explain the approach and criteria.

Methods: lines 375-387, 425-436

Results: lines 163-170

I have also amended the figures to reflect this (Figure 2) and have updated the supplementary R code (additional file 3).

- Now, it is important to note that the actual values on the x-axis on the plots (e.g. Figure 2) are the positions of the first nucleotide of the window. As such, the box drawn on Figure 2 and presented as the 'best candidate site for a short diagnostic amplicon' is slightly misleading because each dot on that graph represents one window. There is also an issue with the positioning of that box as it is clearly not located between positions 160 and 380 as suggested in the legend of Figure 2.

- Indeed, the boxed area was a bit to the right on figure 2, it is fixed now.

Also, I changed the legend in figure 2 to precise that a dot was the window and the x-axis represents the first base of a window.

- Last small comment about the code: I found that on my version of R, there is an issue with object names that start with a number (e.g. 12Sref). Just placing a letter as the first character in the name solves the issue.

- Additional file 3: This problem is now fixed with all names starting with 12S preceded by "db" (for database)
- Lines 41-55 There is no flow between these sentences. They need to be better linked together. As it stands it is rather laborious to read.
- I changed the text so the sentences flow better  
Lines 44-55
- Line 77. it is not clear what you mean by 'barcode tests'
- changed to improve clarity of meaning  
Line 77-81
- Lines 113-114 need rephrasing to avoid repetition
- changed  
Lines 116-120
- lines 114-120. This paragraph follows few sentences where the authors described their study and their taxa. I think it needs to be more clear that here they are back to general statements. Alternatively, these general statements could be placed before the sentence starting with 'Our goal was...'
- changed. I put the general statements (the two common limiting factors) before summarising the findings in this study (our goal was...)  
Lines 109-120
- Line 136. I think it would be useful to include citation [2] here as it is the one describing the sliding window analysis in details.
- changed  
Line 137
- Line 144. To create the UNIQUE database, I am guessing that the first step was to remove the singletons and THEN to only keep one sequence per haplotype. It would make sense to write these two steps in the correct order.
- yes, that makes sense. Changed  
Lines 145-146
- I was also surprised to see that you had singletons in the FULL dataset, given that line 132-133, it is stated that: "Sequences were obtained from GenBank, with additional targeted sequencing conducted for species under-represented in GenBank." If there were indeed singletons and those species were eliminated, it would be useful to list which species they were
- The singletons referred to non-target species. I focused the additional sequencing on specific target taxa most relevant to wildlife surveys in Australia, in particular the quolls which are poorly represented in sequencing databases. Line 133: to specify that I added sequences from the target animals  
I amended Additional file 7 to note all singleton species
- Line 205. Yes, but a 5% distance threshold would have caused much ambiguity for the identification of the other sequences. Any chances one of the sequences for *Dasyercus cristicauda* was obtained on Genbank and could be either mis-identification or a different (cryptic) species?
- the two *Dasyercus* sequences are from the same team of scientists. The origin of only one sequence (AF009889) was mentioned (the Tanami desert in Northern Territory). As for the second, they don't know the origin. So it might be an ID error. I put a note in the text  
Lines 216-219  
Same was true for a western quoll sequence, lines 183-186

- Line 208. rather than 'a wide range of Australian mammals', please provide the number of species
- changed to note that 40 species were included, but also to emphasise that these represent a wide taxonomic range (ie not just 40 species from a single order).  
Line 234-239
- Line 201. Add "and possibly beyond" to the end of the sentence or something similar to acknowledge that you also successfully used the primers with non-mammalian vertebrates. Alternatively, remove reptile amphibian and bird from the previous sentence, and write a new sentence at the end of the paragraph, stating why the primer was tested on those non-mammalian specimens.
- Changed to "This demonstrates the broad applicability of the primers across the mammalian taxa and their potential applicability to other vertebrate classes"  
Lines 234-239
- Table 2. The title for this table could be improved. It does not give much information about what the numbers are. To understand this, the reader need to go to the legend and then guess what 'CT' means or go all the way to the list of abbreviations. Depending on where this list sits in the paper, I would advise to state what CT means in the legend of Table 2.
- Changed. Table 2: Add information in the title, and in the legend: described what CT was and how it is calculated.  
Line 253  
Lines 254-259
- Line 236. I would replace 'the known predator' by 'known predators'
- changed  
Lines 261-262
- Line 254-257. Here the authors highlight how their study brings new knowledge in the subject of DNA-based species detection. This is crucial but not extremely clear. Maybe these sentences need to be restricted to 'studies aiming at identifying predators from scat samples'.
- changed to "Previous studies, based on species identification from scats or hairs, have applied barcoding methods to detect individual species across multiple time points (examples in (Fernández et al. 2006), (McKelvey et al. 2006)). Here we have shown that it is also possible to identify multiple species from a single DNA test, using a straightforward PCR and Sanger sequencing approach"  
Lines 279-282
- Line 239. 92% amplification success is quite good. It would have been interesting to compare this to what can be obtained with primers targeting longer DNA fragments. I understand this was not the aim of this particular paper, but in a sense the authors went into all the trouble of designing mini-barcodes because 'regular (longer) barcodes' don't work. It would be good to put this 92% success rate into perspective with the success rate of longer barcodes if there was any such data in the literature. It is eluded to on line 277, but the actual numbers are not provided.
- in [41]: 79% of sequences were amplified using a 134 bp fragment, and in [56]: <70% using regions from 243 bp to 708 bp (different regions for different taxa)  
Lines 304-307
- Line 273. I would replace 'by' with 'in'
- changed  
Line 300
- Lines 277-282. I would be careful not to inflate the implications of the paper. The

'approach' used is simply DNA barcoding, the benefits of which have been widely demonstrated elsewhere. The real novelty lies in the primers and the mini-barcode designed for Australian mammals, which does make a very useful tool for managers and scientists. So rather than the 'approach' I would highlight the primers or the mini-barcode here

- changed to "Using our mini-barcode, DNA can be screened for the presence of multiple Australian predator species in a single and inexpensive test, without the need to develop and apply a set of species-specific primers for each predator of interest. We provide a non-invasive instrument with potential utility for scientists or managers working with endangered or invasive Australian predators, but a similar approach could be used to target predator assemblages in other regions."  
so more focussed on Australia and the development of the mini-barcode than on the barcoding itself  
lines 307-312

- Line 278. Replace 'screen' by 'screened'

- changed  
Line 307

- Line 299. A reference at the end of this sentence would be useful

- yes, I added 2  
Line 333

- Line 329-331. Very interesting potential application

- yes indeed

- Line 514. Keith Crandall was editor, not co-author, on that paper. The citation needs to be modified accordingly

- Changed  
Line 562

references:  
Fernández N, Delibes M, Palomares F (2006) Landscape evaluation in conservation: molecular sampling and habitat modeling for the Iberian lynx. *Ecol Appl* 16:1037–1049.  
McKelvey KS, Kienast JVON, Aubry KB, et al (2006) DNA analysis of hair and scat collected along snow tracks to document the presence of Canada lynx. *Wildl Soc Bull* 34:451–455.

**Additional Information:**

| Question                                                                                                                                                                                                                                                                                                                                                                                                                           | Response |
|------------------------------------------------------------------------------------------------------------------------------------------------------------------------------------------------------------------------------------------------------------------------------------------------------------------------------------------------------------------------------------------------------------------------------------|----------|
| Are you submitting this manuscript to a special series or article collection?                                                                                                                                                                                                                                                                                                                                                      | No       |
| <p><b>Experimental design and statistics</b></p> <p>Full details of the experimental design and statistical methods used should be given in the Methods section, as detailed in our <a href="#">Minimum Standards Reporting Checklist</a>. Information essential to interpreting the data presented should be made available in the figure legends.</p> <p>Have you included all the information requested in your manuscript?</p> | Yes      |

|                                                                                                                                                                                                                                                                                                                                                                                                                                                                                                                                                         |            |
|---------------------------------------------------------------------------------------------------------------------------------------------------------------------------------------------------------------------------------------------------------------------------------------------------------------------------------------------------------------------------------------------------------------------------------------------------------------------------------------------------------------------------------------------------------|------------|
| <p><b>Resources</b></p> <p>A description of all resources used, including antibodies, cell lines, animals and software tools, with enough information to allow them to be uniquely identified, should be included in the Methods section. Authors are strongly encouraged to cite <a href="#">Research Resource Identifiers</a> (RRIDs) for antibodies, model organisms and tools, where possible.</p> <p>Have you included the information requested as detailed in our <a href="#">Minimum Standards Reporting Checklist</a>?</p>                     | <p>Yes</p> |
| <p><b>Availability of data and materials</b></p> <p>All datasets and code on which the conclusions of the paper rely must be either included in your submission or deposited in <a href="#">publicly available repositories</a> (where available and ethically appropriate), referencing such data using a unique identifier in the references and in the “Availability of Data and Materials” section of your manuscript.</p> <p>Have you have met the above requirement as detailed in our <a href="#">Minimum Standards Reporting Checklist</a>?</p> | <p>Yes</p> |



1 **Title:**

2 A single mini-barcode test to screen for Australian mammalian predators from  
3 environmental samples

4 **Authors:**

5 Elodie Modave<sup>1</sup>, Anna J MacDonald<sup>1</sup> and Stephen D Sarre<sup>1</sup>

6 **Address:**

7 <sup>1</sup> Institute for Applied Ecology, University of Canberra, ACT, 2601, Canberra, Australia

8 **Email addresses:**

9 Elodie Modave: [Elodie.modave@canberra.edu.au](mailto:Elodie.modave@canberra.edu.au)

10 Anna J MacDonald: [Anna.MacDonald@canberra.edu.au](mailto:Anna.MacDonald@canberra.edu.au)

11 Stephen D Sarre: [Stephen.Sarre@canberra.edu.au](mailto:Stephen.Sarre@canberra.edu.au)

12 **Corresponding author:**

13 Elodie Modave, Institute for Applied Ecology, University of Canberra, ACT, 2601, Australia.

14 Telephone: +61 2 6201 2267. Fax: +61 2 6201 5305. Email: [elodie.modave@canberra.edu.au](mailto:elodie.modave@canberra.edu.au)

15 **Running title:**

16 Mini-barcode for species identification

17 **ABSTRACT**

18 Background: Identification of species from trace samples is now possible through the  
19 comparison of diagnostic DNA fragments against reference DNA sequence databases. DNA  
20 detection of animals from non-invasive samples, such as predator faeces (scats) that contain

1  
2  
3  
4  
5  
6  
7  
8  
9  
10  
11  
12  
13  
14  
15  
16  
17  
18  
19  
20  
21  
22  
23  
24  
25  
26  
27  
28  
29  
30  
31  
32  
33  
34  
35  
36  
37  
38  
39  
40  
41  
42  
43  
44  
45  
46  
47  
48  
49  
50  
51  
52  
53  
54  
55  
56  
57  
58  
59  
60  
61  
62  
63  
64  
65

21 traces of DNA from their species of origin, has proved to be a valuable tool for management  
22 of elusive wildlife. However, application of this approach can be limited by the availability of  
23 appropriate genetic markers. Scat DNA is often degraded, meaning that longer DNA  
24 sequences, including standard DNA barcoding markers, are difficult to recover. Instead,  
25 targeted short diagnostic markers are required to serve as diagnostic mini-barcodes. The  
26 mitochondrial genome is a useful source of such trace DNA markers, because it provides  
27 good resolution at species level and occurs in high copy numbers per cell.

28 Results: We developed a mini-barcode, based on a short (178 bp) fragment of the conserved  
29 12S rRNA mitochondrial gene sequence, with the goal of discriminating amongst the scats of  
30 large mammalian predators of Australia. We tested the sensitivity and specificity of our  
31 primers and can accurately detect and discriminate amongst quolls, cats, dogs, foxes and  
32 devils from trace DNA samples.

33 Conclusions: Our approach provides a cost effective, time efficient and non-invasive tool  
34 that enables identification of all eight medium-large mammal predators in Australia,  
35 including native and introduced species, using a single test. With modification, this approach  
36 is likely to be of broad applicability elsewhere.

37 **Keywords:**

38 12S rRNA; Dasyurus; DNA barcoding; DNA detection; marsupial; monitoring

39 **BACKGROUND**

40 The looming biodiversity crisis, referred to by some as the Sixth Mass Extinction [1],  
41 has made the conservation of wildlife a rapidly growing concern. There is an urgent need to  
42 document the distribution of biodiversity as the foundation for identifying effective solutions

1  
2  
3  
4  
5 43 to wildlife management issues. The rapid and reliable identification of species at local and  
6  
7  
8  
9 44 regional scales can provide the first step towards determining the distribution of biodiversity  
10  
11  
12  
13  
14 45 in the landscape and changes that might be occurring in that distribution.  
15  
16  
17  
18  
19  
20  
21  
22  
23  
24  
25  
26  
27  
28  
29  
30  
31  
32  
33  
34  
35  
36  
37  
38  
39  
40  
41  
42

46 Advances in genetics and genomics have revolutionized many areas of biology and in  
47 particular, the identification of wildlife from trace and environmental samples (e.g. water,  
48 soil and faeces, or scats) is now possible through DNA barcoding [2], [3], [4], [5], where the  
49 identity of an unknown sample is established by comparing DNA sequences obtained from  
50 that sample to an appropriate reference sequence database. The application of DNA  
51 barcoding for the identification of species from such environmental DNA (eDNA) samples is  
52 useful, particularly when the target species is rare, elusive, difficult to trap or observe  
53 without direct interference with live animals, or where morphological identification is  
54 problematic [6], [7], [8], [9], [10]. It also makes possible the identification of diet from scats  
55 where morphological determinations are likely to be unsuitable for many elements of the  
56 diet [11], [12], [13], [14], [15]. Consequently, eDNA analysis from environmental samples  
57 collected across a broad spatial and temporal distribution has great potential for enhancing  
58 biodiversity management, but is yet to be widely implemented [16], [17].  
59  
60  
61  
62  
63  
64  
65

66 The DNA associated with environmental samples tends to be of low quantity or  
67 quality and can be degraded. To ensure that markers for eDNA detection are specific and  
68 sensitive, target sequences, also known as mini-barcodes, should be short (i.e. 100-200 base  
69 pairs (bp); [18], [19], [20], [2]) and yet have high discriminatory power [21], [22], [23], [24].  
70  
71  
72  
73  
74  
75  
76  
77  
78  
79  
80  
81  
82  
83  
84  
85  
86  
87  
88  
89  
90  
91  
92  
93  
94  
95  
96  
97  
98  
99  
100  
101  
102  
103  
104  
105  
106  
107  
108  
109  
110  
111  
112  
113  
114  
115  
116  
117  
118  
119  
120  
121  
122  
123  
124  
125  
126  
127  
128  
129  
130  
131  
132  
133  
134  
135  
136  
137  
138  
139  
140  
141  
142  
143  
144  
145  
146  
147  
148  
149  
150  
151  
152  
153  
154  
155  
156  
157  
158  
159  
160  
161  
162  
163  
164  
165

66 therefore more common in trace samples than nuclear sequences, because they can give  
67 good resolution of identification at species level, and because their genome is circular, which  
68 helps preserving the DNA in some instances. In regions where little is known of the genetic  
69 characteristics of the faunal assemblage, identifying the most appropriate DNA sequences to  
70 target the fauna present to achieve acceptable levels of accuracy is a challenging exercise  
71 and requires a reference database that is sufficiently comprehensive to ensure accurate  
72 species assignment [25]. In short, we need DNA barcoding markers that are appropriate to  
73 the question being addressed, the ecosystem considered and the taxonomic group studied.  
74 Most importantly, if DNA detection is going to be of practical benefit, we need to maximise  
75 its effectiveness by developing mini-barcodes that target as many taxa as possible, thus  
76 minimising the number of tests that need to be applied. Most DNA barcode studies so far  
77 implemented for detection of specific species from terrestrial systems have targeted single  
78 species (examples in [7], [9], [26], [27]) to avoid the ambiguity that might arise by attempting  
79 to simultaneously identify multiple closely related taxa. Here, we tackle this problem using  
80 all extant medium-large Australian mammalian predators as a case study.

81         Australia has a unique assemblage of medium-large mammalian predators, including  
82 a suite of marsupials of Gondwanan heritage intermixed with relatively recently arrived  
83 eutherian mammals introduced by humans [28], [29]. Here, we develop a DNA mini-barcode  
84 to discriminate amongst these key predators, with the goal of species identification using  
85 eDNA extracted from scats. We targeted the top native marsupial predators that are likely to  
86 produce large easily visible scats including: six species of quoll (four Australian and two New-  
87 Guinean; *Dasyurus maculatus*, *D. viverrinus*, *D. geoffroi*, *D. hallucatus*, *D. albopunctatus* and  
88 *D. spartacus*), the Tasmanian devil (*Sarcophilus harrisii*), and the extinct thylacine (*Thylacinus*  
89 *cynocephalus*), as well as key eutherian mammal predators: the native dingo (*Canis lupus*

1  
2  
3  
4  
5  
6  
7  
8  
9  
10  
11  
12  
13  
14  
15  
16  
17  
18  
19  
20  
21  
22  
23  
24  
25  
26  
27  
28  
29  
30  
31  
32  
33  
34  
35  
36  
37  
38  
39  
40  
41  
42  
43  
44  
45  
46  
90 *dingo*), and the introduced domestic dog (*Canis lupus familiaris*), red fox, (*Vulpes vulpes*),  
91 and domestic cat (*Felis catus*) that are now feral in much of the country. Most of the native  
92 marsupial predators have been in decline since, or even before, European settlement in  
93 1788 [30]. Tasmanian devils and the thylacine became extinct on the Australian mainland  
94 within the last 3000 to 4000 years [31], but still existed on the island of Tasmania at the time  
95 of European settlement. The thylacine has subsequently been hunted to extinction [32], [33]  
96 while devil populations have decreased dramatically since the 1990s following the  
97 emergence of Devil Facial Tumour Disease [34], [35], [36]. Several species of quoll, together  
98 with the dingo, have declined in distribution and abundance on the Australian mainland  
99 since European settlement from multiple causes that probably include habitat destruction,  
100 hunting, predation by cats and foxes, the spread of cane toads [37], [38], [39] and in the case  
101 of dingos, hybridisation with domestic dogs. Although declining or extinct on the mainland,  
102 substantial populations of the Tasmanian devil, the spotted-tailed quoll (*D. maculatus*) and  
103 the eastern quoll (*D. viverrinus*) remain on the island of Tasmania where they have  
104 important ecological roles [40]. However, recent evidence of foxes in Tasmania [41] and  
105 potential competition with feral cats [42], [43] compound the issue, and have stimulated an  
106 urgent need to understand threats to native predator populations and enable effective  
107 management.

47  
48  
49  
50  
51  
52  
53  
54  
55  
56  
57  
58  
59  
60  
61  
62  
63  
64  
65  
108 Two factors generally limit the application of a DNA barcoding approach. First, short  
109 diagnostic sequences that encompass the range of species to be targeted are difficult to find  
110 and are likely to be specific to a particular faunal assemblage. Second, the full suite of  
111 potential target organisms tends to be poorly known in most natural systems, and reference  
112 DNA sequences are not available for many wildlife species, necessitating the development of  
113 reference libraries to guide marker selection and interpretation of results. Our goal was to

114 develop a mini-barcode that can identify all medium to large mammal predators in Australia  
115 in a single analysis, including quolls, to species level. This has been difficult to achieve using  
116 existing genetic markers because of the high levels of sequence conservation observed  
117 between quoll species. We compiled a reference tissue collection and identified a mini-  
118 barcode based on the conserved 12S rRNA mitochondrial region that discriminated among  
119 taxa with minimal variation within species [44], [45]. We evaluate the specificity and  
120 sensitivity of this mini-barcode using the framework outlined in [25] and [46]. By targeting all  
121 extant medium to large carnivores in Australia, we aim to produce a mini-barcode that can  
122 be applied broadly within continental Australia as well as Tasmania. We demonstrate that  
123 despite close homology among some taxa, it is possible to design and implement eDNA  
124 markers with high discriminatory power for key continental terrestrial fauna incorporating  
125 both marsupials and eutherian mammals. Our approach can be implemented in other parts  
126 of the world by targeting appropriate fauna assemblage in the development of the mini-  
127 barcode.

## 128 **DATA DESCRIPTION**

129 We identified the 12S rRNA gene as a target for development of a mini-barcode  
130 marker. We developed a reference DNA database for this gene, including 174 sequences  
131 from 24 genera and 41 mammal species. Sequences were obtained from GenBank, with  
132 additional targeted sequencing conducted for target species under-represented in GenBank.  
133 Sequences were aligned, trimmed to 901 bp, and are provided here in FASTA format  
134 (Additional file 1) with additional information on sample and sequence origins in .csv format  
135 (Additional file 2).

136 We used the R package SPIDER [47] to conduct a sliding window analysis [2] to identify a  
137 short diagnostic region of the 12S rRNA gene suitable for use as a mini-barcode marker. R  
138 code for this analysis is provided in text format (Additional file 3).

139       Following design of the *AusPreda\_12S* primers, we conducted bioinformatic and  
140 laboratory evaluations of the sensitivity and specificity of the mini-barcode. We created two  
141 modified versions of our reference 12S rRNA database, trimmed to include only the 178 bp  
142 flanked by the mini-barcode *AusPreda\_12S* primers. The “FULL” database included all 174  
143 sequences from the original database, while the “UNIQUE” database included a subset of 44  
144 sequences, where singleton species (species represented by only one haplotype) were  
145 removed, and where each remaining haplotype was represented by only a single sequence.  
146 These two databases are provided here in FASTA format (Additional files 4 and 5). We used  
147 the R package SPIDER to conduct genetic distance based evaluations of the *AusPreda\_12S*  
148 primers, to identify the risks of incorrect or ambiguous species identifications based on this  
149 sequence. R code for these analyses is provided in text format (Additional file 6) and detailed  
150 results are provided in .csv format (Additional file 7).

151       We conducted PCRs to evaluate amplification success using the *AusPreda\_12S*  
152 primers on tissue samples from a range of mammal species. Details of samples used are  
153 provided in .csv format (Additional file 8). We also tested amplification success from known-  
154 origin scats collected from six different predator species. All PCR products successfully  
155 amplified from scats were sequenced to confirm predator of origin: resulting sequences are  
156 provided here in FASTA format (Additional file 9).

## 157 **RESULTS**

### 158 **Development of a new mammal mini-barcode**

159 We selected the 12S rRNA gene as a promising candidate marker for development of  
1  
2  
3 160 a mini-barcode and developed a 12S rRNA reference sequence database for Australian  
4  
5 161 mammals comprising 174 sequences. Within the 12S rRNA gene, we identified a 178 bp  
6  
7 162 diagnostic mini-barcode region that displayed high levels of inter-specific variation. Within  
8  
9  
10 163 this region, the proportion of zero non-conspecific K2P distances was equal to zero for  
11  
12  
13 164 windows of 175 bp in length, and the number of diagnostic nucleotides per window was  
14  
15 165 high. We identified two potential primer sites with high proportions of zero non-conspecific  
16  
17  
18 166 K2P distances (>0.8) and low numbers of diagnostic nucleotides (0-1 nucleotides per 20bp  
19  
20  
21 167 window). We designed two conserved primers, *AusPreda\_12SF* and *AusPreda\_12SR*, to  
22  
23 168 amplify this mini-barcode from a range of mammal species. The final PCR product was 218  
24  
25  
26 169 bp in length, including the primers.

#### 27 28 29 170 **Bioinformatic evaluation of the mini-barcode**

30  
31  
32  
33 171 We used three different genetic distance based analyses to estimate the risks of  
34  
35 172 species mis-identification when using our *AusPreda\_12S* primers on samples of unknown  
36  
37  
38 173 origin (Table 1, Additional file 7). These analyses used versions of the 12S rRNA reference  
39  
40  
41 174 sequence database, trimmed to include only the 178 bp mini-barcode region (Additional files  
42  
43 175 4 and 5). A *nearNeighbour* analysis of all sequences (the “FULL” database) correctly  
44  
45 176 identified 155 sequences and incorrectly identified 19 sequences. All incorrectly identified  
46  
47  
48 177 sequences except one western quoll (*D. geoffroii*) from GenBank originated from species for  
49  
50  
51 178 which only a single reference sequence was available (i.e. singleton species), and thus the  
52  
53 179 nearest neighbour was automatically another species. In most cases this nearest neighbour  
54  
55  
56 180 was a member of the same genus. For example, the nearest neighbour of the only bronze  
57  
58  
59 181 quoll (*D. spartacus*) sequence available was from the western quoll (*D. geoffroii*). This close



182 genetic similarity has also been shown by Woolley *et al.* [48]. The western quoll incorrectly  
 183 identified with the nearest neighbour analyses was closely related to the bronze quoll which  
 184 can indicate that this particular western quoll sequence from GenBank (KJ780027) was  
 185 possibly mis-identified. Further analyses using a database including only unique haplotypes,  
 186 from which singleton species were excluded (the “UNIQUE” database) identified correctly all  
 187 44 sequences.

188 Table 1: Summary of results of genetic distance-based evaluations of the *AusPreda\_12S* mini-  
 189 barcode.

|                          | FULL (1% threshold)   |                   |           |       | UNIQUE (3.5% threshold) |                   |           |       |
|--------------------------|-----------------------|-------------------|-----------|-------|-------------------------|-------------------|-----------|-------|
|                          | Correct / True        | Incorrect / False | Ambiguous | No ID | Correct / True          | Incorrect / False | Ambiguous | No ID |
| <i>Nearest neighbour</i> | 155                   | 19                | -         | -     | 44                      | 0                 | -         | -     |
| <i>Best close match</i>  | 147                   | 3                 | 0         | 24    | 42                      | 0                 | 0         | 2     |
| <i>Thresh ID</i>         | 142                   | 3                 | 5         | 24    | 42                      | 0                 | 0         | 2     |
|                          | FULL (3.5% threshold) |                   |           |       |                         |                   |           |       |
|                          | Correct / True        | Incorrect / False | Ambiguous | No ID |                         |                   |           |       |
| <i>Best close match</i>  | 152                   | 6                 | 0         | 16    |                         |                   |           |       |
| <i>Thresh ID</i>         | 141                   | 5                 | 12        | 16    |                         |                   |           |       |

190  
 191 Legend: Summary of results of genetic distance-based evaluations of the *AusPreda\_12S* mini-barcode  
 192 conducted using the R package SPIDER to analyse the “FULL” (at 1% and 3.5% thresholds) and  
 193 “UNIQUE” (at 3.5% threshold) reference sequences databases. The thresholds were calculated based  
 194 on the minimum cumulative error (Additional file 6) and the 3.5% threshold for the “FULL” database  
 195 allows for comparison between the two databases. The specified genetic distance thresholds were  
 196 used for the *bestCloseMatch* and *threshID* analyses.

197  
 198 *BestCloseMatch* and *ThreshID* analyses, which both assume that sequences from a  
 199 single species fall within a specified genetic distance threshold, correctly identified 147 and  
 200 142 sequences respectively in the “FULL” database using the 1% threshold given by the  
 201 minimum cumulative error. Three sequences were incorrectly identified in both analyses:  
 202 *Dasyurus spartacus* (AF009892), *Pseudantechinus macdonnellensis* (EU086642) and  
 203 *Pseudantechinus roryi* (EU086650) each representing singleton species, and falling within the  
 204 1% genetic distance threshold of a congeneric species enabling them to be mistaken for their

205 close relatives. Five *D. geoffroii* sequences were correctly identified using *BestCloseMatch*  
1  
2  
3 206 but were ambiguously identified in the *ThreshID* analysis because of a close similarity (within  
4  
5 207 the 1% genetic distance threshold) with the single *D. spartacus* sequence. A further 24  
6  
7 208 sequences could not be identified in either analysis because all other sequences within the  
8  
9  
10 209 reference database were more than 1% different. The majority of these sequences were  
11  
12  
13 210 from singletons, but a more relaxed genetic distance threshold (2%-5%) identified them  
14  
15 211 correctly. *BestCloseMatch* and *ThreshID* analyses of the “UNIQUE” database identified  
16  
17  
18 212 correctly 42 of 44 sequences, but the two remaining sequences, both from *Dasyercus*  
19  
20  
21 213 *cristicauda*, could not be identified (Table 1; details of results: Additional file 7). As noted  
22  
23 214 previously, these sequences would have been correctly identified if a genetic distance  
24  
25  
26 215 threshold of 5% was used. This represents a high level of divergence between two  
27  
28 216 conspecific sequences, but as both of these sequences were obtained from GenBank, and  
29  
30  
31 217 the origin of one of the samples is unknown, we cannot rule out sample misidentification or  
32  
33 218 sequencing error in this instance.

34  
35  
36  
37 219 Using a 3.5% genetic threshold for the “FULL” database, to allow for comparison with  
38  
39 220 the results obtained with the “UNIQUE” database, correctly identified more sequences with  
40  
41  
42 221 the *BestCloseMatch* analysis which was to be expected using a more relaxed genetic  
43  
44  
45 222 threshold allowing for more mismatches among sequences. Nevertheless, six sequences  
46  
47 223 previously resulting in an “No ID” match became correctly identified and two became  
48  
49  
50 224 incorrectly identified. The western quoll (KJ780027) became incorrectly identified using a  
51  
52 225 higher threshold which, once again, lead us to believe that this sequences from GenBank  
53  
54  
55 226 was incorrectly identified to start with. Comparing the *ThreshID* results with the more  
56  
57 227 conservative approach used with the 1% threshold, five sequences that were previously  
58  
59  
60 228 correctly identified became ambiguous and from eight sequences resulting in a “No ID”

229 match, four became correctly identified, two became incorrectly identified and two had an  
1  
2  
3 230 ambiguous identification.

4  
5  
6 231 **Evaluation of the amplification success and sensitivity of the *AusPreda\_12S* primers**

7  
8  
9 232 Our mini-barcode was successfully amplified from all 45 tissue samples tested,  
10  
11 233 including samples from a wide taxonomic range of Australian mammals (40 species), as well  
12  
13  
14 234 as a reptile, an amphibian and a bird (Figure 1, Additional file 8). This demonstrates the  
15  
16  
17 235 broad applicability of the primers across the mammalian taxa and their potential  
18  
19 236 applicability to other vertebrate classes. Because we aimed to target both marsupial and  
20  
21  
22 237 eutherian mammals, we were unable to identify a mini-barcode that amplified only the six  
23  
24  
25 238 target species.

26  
27  
28 239 We also successfully amplified our mini-barcode from a wide range of input template  
29  
30  
31 240 DNA concentrations. We set up serial dilutions of DNA from six predator species.  
32  
33 241 Amplification was successful for all three qPCR replicates from all six species for all dilutions  
34  
35  
36 242 from 9 ng /  $\mu$ l to 9 pg /  $\mu$ l inclusive, demonstrating that the primers can amplify from low  
37  
38  
39 243 quantity DNA. Amplification success was less consistent at the highest and lowest DNA  
40  
41 244 concentrations, estimated at 90 ng /  $\mu$ l, 0.9 pg /  $\mu$ l and 0.09 pg /  $\mu$ l (Table 2) indicating that  
42  
43  
44 245 reliability of predator detection from DNA below 9 pg /  $\mu$ l may be poor. Failure to amplify  
45  
46 246 from highly concentrated DNA, despite successful amplification from dilutions of the same  
47  
48  
49 247 DNA extracts, may reflect the presence of PCR inhibitors in these extracts, which were  
50  
51  
52 248 obtained from museum and roadkill specimens.

53  
54  
55 249

250 Table 2: Results of qPCR tests conducted to evaluate amplification success of the *AusPreda*\_12S mini-  
 251 barcode from low template DNA. Six DNA samples were serially diluted, with amplification success  
 252 determined by comparison of CT values<sup>1</sup> for three replicates of each dilution.

| Species                                        | Dilution                    | Replicate 1               | Replicate 2               | Replicate 3         | CT Mean <sup>2</sup> |
|------------------------------------------------|-----------------------------|---------------------------|---------------------------|---------------------|----------------------|
| <b>Cat<br/>N22b</b>                            | 1 in 10 (9 ng/μl)           | 12.444                    | 14.281                    | 13.373              | 13.366               |
|                                                | 1 in 100 (0.9 ng/μl)        | <b>16.346<sup>3</sup></b> | 13.399                    | 13.368              | 13.384               |
|                                                | 1 in 1000 (0.09 ng/μl)      | 19.252                    | 23.382                    | 23.994              | 22.209               |
|                                                | 1 in 10 000 (9 pg/μl)       | 31.252                    | 27.486                    | 27.604              | 28.781               |
|                                                | 1 in 100 000 (0.9 pg/μl)    | 31.483                    | 31.476                    | 29.386              | 30.782               |
|                                                | 1 in 1 000 000 (0.09 pg/μl) | <b>Undetermined</b>       | <b>Undetermined</b>       | <b>Undetermined</b> | -                    |
| <b>Dingo<br/>AA15020</b>                       | 1 in 10 (9 ng/μl)           | 14.303                    | 13.019                    | 15.363              | 14.228               |
|                                                | 1 in 100 (0.9 ng/μl)        | 15.879                    | 16.791                    | 16.623              | 16.431               |
|                                                | 1 in 1000 (0.09 ng/μl)      | 19.719                    | 19.237                    | 17.424              | 18.793               |
|                                                | 1 in 10 000 (9 pg/μl)       | 22.652                    | 24.957                    | 25.196              | 24.268               |
|                                                | 1 in 100 000 (0.9 pg/μl)    | <b>Undetermined</b>       | <b>Undetermined</b>       | <b>Undetermined</b> | -                    |
|                                                | 1 in 1 000 000 (0.09 pg/μl) | <b>Undetermined</b>       | <b>Undetermined</b>       | <b>Undetermined</b> | -                    |
| <b>Eastern<br/>quoll<br/>UC1214</b>            | 1 in 10 (9 ng/μl)           | 14.128                    | 13.509                    | 13.449              | 13.695               |
|                                                | 1 in 100 (0.9 ng/μl)        | 17.267                    | <b>20.866<sup>3</sup></b> | 17.235              | 17.251               |
|                                                | 1 in 1000 (0.09 ng/μl)      | 17.662                    | 21.523                    | 21.385              | 20.190               |
|                                                | 1 in 10 000 (9 pg/μl)       | 24.346                    | 26.474                    | 25.653              | 25.491               |
|                                                | 1 in 100 000 (0.9 pg/μl)    | <b>Undetermined</b>       | <b>Undetermined</b>       | 34.570              | 34.570               |
|                                                | 1 in 1 000 000 (0.09 pg/μl) | <b>Undetermined</b>       | <b>Undetermined</b>       | <b>Undetermined</b> | -                    |
| <b>Spotted-<br/>tailed<br/>quoll<br/>A3395</b> | 1 in 10 (9 ng/μl)           | 13.460                    | 13.928                    | 14.048              | 13.812               |
|                                                | 1 in 100 (0.9 ng/μl)        | 17.517                    | 16.447                    | 18.653              | 17.539               |
|                                                | 1 in 1000 (0.09 ng/μl)      | 20.374                    | 19.540                    | 17.003              | 18.972               |
|                                                | 1 in 10 000 (9 pg/μl)       | 27.511                    | 25.453                    | 23.851              | 25.605               |
|                                                | 1 in 100 000 (0.9 pg/μl)    | 30.158                    | 30.132                    | 25.107              | 28.466               |
|                                                | 1 in 1 000 000 (0.09 pg/μl) | <b>Undetermined</b>       | 35.172                    | <b>Undetermined</b> | 35.172               |
| <b>Red fox<br/>UC0401</b>                      | 1 in 10 (9 ng/μl)           | 15.547                    | 15.528                    | 14.628              | 15.234               |
|                                                | 1 in 100 (0.9 ng/μl)        | 19.566                    | 17.524                    | 16.860              | 17.983               |
|                                                | 1 in 1000 (0.09 ng/μl)      | 21.915                    | 22.827                    | 22.360              | 22.367               |
|                                                | 1 in 10 000 (9 pg/μl)       | 26.672                    | 25.460                    | 25.508              | 25.880               |
|                                                | 1 in 100 000 (0.9 pg/μl)    | 31.672                    | 30.914                    | 28.863              | 30.483               |
|                                                | 1 in 1 000 000 (0.09 pg/μl) | <b>Undetermined</b>       | 31.601                    | <b>Undetermined</b> | 31.601               |
| <b>Tasmanian<br/>devil<br/>A3357</b>           | 1 in 10 (9 ng/μl)           | 15.502                    | <b>16.810<sup>3</sup></b> | 14.536              | 15.019               |
|                                                | 1 in 100 (0.9 ng/μl)        | 19.736                    | 18.729                    | 19.702              | 19.389               |
|                                                | 1 in 1000 (0.09 ng/μl)      | 23.517                    | 22.999                    | 21.591              | 22.702               |
|                                                | 1 in 10 000 (9 pg/μl)       | 27.216                    | 28.006                    | 24.130              | 26.451               |
|                                                | 1 in 100 000 (0.9 pg/μl)    | 30.876                    | 30.734                    | 28.977              | 30.196               |
|                                                | 1 in 1 000 000 (0.09 pg/μl) | 32.534                    | <b>Undetermined</b>       | <b>Undetermined</b> | 32.534               |

253 <sup>1</sup> Numbers represent observed CT (cycle threshold) values for each replicate qPCR of a series of DNA  
 254 dilutions. The CT value represents the number of cycles required for the fluorescent signal of a qPCR  
 255 machine to cross the predetermined threshold, here set at 5000 ΔRn.

256 <sup>2</sup> Undetermined results were excluded when calculating mean CT.

257 <sup>3</sup> Where the qPCR traces were of an irregular shape (three replicates), the replicate was excluded  
258 when calculating mean CT.

### 259 **Evaluation of amplification success from trace samples using known-origin scats**

260 We tested the ability of the *AusPreda\_12S* primers to correctly identify known  
261 predators by analysing scats from captive animals. 57 scats were tested and amplified  
262 product was obtained from 53 samples. We obtained good quality DNA sequences, ranging  
263 from 116 bp to 182 bp in length, from 49 (92%) of these 53 scats (Additional file 9). The  
264 species of origin was correctly identified for all 49 samples, with scat DNA sequences  
265 matched to appropriate GenBank reference sequences with 97-100% sequence identity  
266 (Table 3).

## 267 **DISCUSSION**

268 Non-invasive environmental DNA-based methods can provide a novel approach to  
269 the detection of cryptic animals in large-scale surveys [49], with applications to wildlife  
270 management. Such DNA approaches can make important contributions to the ability to  
271 detect incursions or monitor established invasive species [50], [51], [41] or to detect very  
272 rare or declining species of conservation significance [52][8].

273 Here, we report a PCR-based mini-barcode test for medium-large Australian  
274 mammalian predators. This test can amplify DNA from and discriminate among the four  
275 quoll species found in Australia, as well as the Tasmanian devil (the only other extant large  
276 marsupial predator) and introduced mammal carnivores with a high level of accuracy. We  
277 expect that these primers will also amplify DNA from both species of New Guinean quoll.  
278 Previous studies, aimed at identifying species from scats or hairs, have applied barcoding

279 methods to detect individual species across multiple time points (examples in [53], [54]).  
1  
2  
3 280 Here we have shown that it is also possible to identify multiple species by implementing a  
4  
5 281 single DNA test, using a straightforward PCR and Sanger sequencing approach. All clear  
6  
7 282 sequences obtained from 49 scats of six target predator species were correctly identified to  
8  
9  
10 283 species level. In the small number of cases where a clear sequence was not obtained from a  
11  
12  
13 284 scat, we found that the sequences obtained were mixed, probably arising from the  
14  
15 285 amplification of two or more species in the same sample. This could arise from cross  
16  
17  
18 286 contamination among samples but is more likely the result of the amplification of prey DNA  
19  
20  
21 287 present in the scat [14], [55]. We have previously observed this phenomenon when using a  
22  
23 288 single species test to detect fox DNA, where rabbit or hare DNA were sometimes  
24  
25  
26 289 erroneously amplified [37]. This demonstrates the need to account for the history of  
27  
28  
29 290 samples analysed (how they were obtained, how fresh they were upon collection, and how  
30  
31 291 samples and DNA extracts were stored) and the importance of a DNA sequencing step in any  
32  
33  
34 292 of these analyses to enable recognition of non-specific PCR amplification. In practice, mixed  
35  
36 293 sequences cannot be used to identify the predator with confidence and therefore such  
37  
38  
39 294 samples must be excluded from analysis. In addition to successful amplification of scat DNA,  
40  
41 295 we demonstrate that our mini-barcode primers can successfully amplify low-template DNA  
42  
43  
44 296 (at least as low as 0.9 pg /  $\mu$ l) from museum samples. This provides further evidence of the  
45  
46 297 utility of this marker for application to eDNA studies.

48  
49  
50 298           Whilst DNA metabarcoding may more clearly determine which species are  
51  
52  
53 299 represented in mixed samples, metabarcoding methods are relatively costly and require  
54  
55 300 more specialist equipment, which may not be available to many wildlife managers. In this  
56  
57  
58 301 study, PCR and Sanger sequencing reliably identified the predator of origin for 86% of scat  
59  
60 302 samples, which is likely to be sufficient for many management applications and is a higher

1  
2  
3 304 where 79% of sequences were amplified using a 134 bp fragment and [57], where <70% of  
4  
5 305 sequences were amplified using regions ranging from 243 bp to 708 bp according to target  
6  
7 306 taxon). Using our mini-barcode, DNA can be screened for the presence of multiple Australian  
8  
9  
10 307 predator species in a single and inexpensive test, without the need to develop and apply a  
11  
12 308 set of species-specific primers for each predator of interest. We provide a non-invasive  
13  
14  
15 309 instrument with potential utility for scientists or managers working with endangered or  
16  
17  
18 310 invasive Australian predators, but a similar approach could be used to target predator  
19  
20  
21 311 assemblages in other regions.  
22  
23

24 312           The bioinformatic evaluation of our mini-barcode shows that this marker can reliably  
25  
26 313 discriminate among the eight target predator species (eastern, western, northern and  
27  
28  
29 314 spotted-tail quolls, Tasmanian devils, cats, dogs and foxes) in Australia. The close genetic  
30  
31  
32 315 similarity between the bronze quoll (from New Guinea) and the western quoll (from  
33  
34 316 Australia), described above and supported by [48], may pose some problems for reliable  
35  
36  
37 317 species identification from unknown samples, but the different geographic distributions of  
38  
39  
40 318 these two species will likely provide a clear identification in most cases. The most  
41  
42 319 appropriate threshold to be used will depend on the management context and the relative  
43  
44  
45 320 importance of false positive identifications, but in most cases, an ambiguous or “No ID”  
46  
47 321 identification would be a better result for a sample than to result in a correct identification  
48  
49  
50 322 when this is erroneous.  
51  
52

53 323           Further development of our reference database, to include additional *D.*  
54  
55 324 *albopunctatus* and *D. spartacus* sequences, will be required to better understand the utility  
56  
57  
58 325 of this test for identification of specimens to species level in New Guinea. Likewise, a better  
59  
60  
61

1  
2  
3 327 samples. Sequences from the extinct thylacine could be clearly identified in our initial  
4  
5 328 analyses, but this species could not be included in the UNIQUE database for further  
6  
7 329 bioinformatic analysis because only one 12S rRNA haplotype was available. Finally, because  
8  
9  
10 330 we are working with mitochondrial DNA which is maternally inherited, we cannot currently  
11  
12  
13 331 use this test to distinguish between dogs and dingos, in part because of the prevalence of  
14  
15 332 hybrids in many wild populations [57], [58].  
16  
17  
18

### 19 333 **Considerations when working with scats**

20  
21

22 334           One important consideration for future studies using the *AusPreda\_12S* primers is  
23  
24  
25 335 the need to understand the ecological role of the species from which eDNA is detected.  
26  
27 336 Typically, predator DNA is the most abundant in scats, owing to the release of epithelial cells  
28  
29  
30 337 during defecation [59], [60], [61]. However, because there are multiple potential sources of  
31  
32  
33 338 DNA in scat samples, it is also possible that these primers will amplify DNA from prey  
34  
35 339 species. In some cases, this will be obvious, for example where the scats of the prey species  
36  
37  
38 340 detected are clearly morphologically different from carnivore scats. However, other results  
39  
40  
41 341 may be more difficult to interpret, for example where mixed sequences, representing two  
42  
43 342 different predator species which could potentially predate upon one another, are obtained  
44  
45  
46 343 from the same sample.  
47  
48

### 49 344 **Conservation implications**

50  
51

52 345           The *AusPreda\_12S* primers provide an opportunity to enhance monitoring of  
53  
54  
55 346 predators across Australia for conservation purposes [63]. For example, western quolls were  
56  
57  
58 347 successfully re-established in Western Australia in 1987 after a recovery plan implemented  
59  
60 348 over 13 years, in areas previously baited with 1080 to remove introduced species [63].  
61  
62  
63  
64  
65



1  
2  
3  
4  
5  
6  
7  
8  
9  
10  
11  
12  
13  
14  
15  
16  
17  
18  
19  
20  
21  
22  
23  
24  
25  
26  
27  
28  
29  
30  
31  
32  
33  
34  
35  
36  
37  
38  
39  
40  
41  
42  
43  
44  
45  
46  
47  
48  
49  
50  
51  
52  
53  
54  
55  
56  
57  
58  
59  
60  
61  
62  
63  
64  
65

349 Western quolls from Western Australia were also re-introduced to the Flinders Ranges in  
350 South Australia in 2014, and that population is now breeding in the wild, with more than 60  
351 young born since their relocation [64], [65]. Eastern quolls were re-introduced from  
352 Tasmania to Mulligans Flat Woodland Sanctuary, in the Australian Capital Territory, in early  
353 2016 [66]. There are also proposals to reintroduce devils to south-eastern mainland Australia  
354 to reduce the negative impact that dingo control has on small-mammals through  
355 mesopredator release [67], [68], [69], [70]. The development of this mini-barcode now  
356 provides a new tool with which to monitor these re-introduced species, and the non-native  
357 predators that threaten them, from non-invasive samples.

## 358 **Future work**

359 In the future, this predator identification tool may be used to model the distribution  
360 of predators in Tasmania or mainland Australia, supplementing more traditional data  
361 obtained from live trapping and sightings. It is now possible to reliably detect a predator of  
362 interest from non-invasive samples. Using the *AusPreda\_12S* primers in an initial sample  
363 screening step may provide further opportunities to study the diets of each specific  
364 predator, by identifying samples to include in targeted metabarcoding studies. This test  
365 could also be more broadly useful, with potential application to detection and monitoring of  
366 the two New Guinean quoll species.

## 367 **METHODS**

### 368 **Selection of a candidate marker gene**

369 We compiled initial reference databases for three mitochondrial genes, 12S rRNA,  
370 16S rRNA and ND2, all of which have proven useful for species detection in other studies

1  
2  
3 371 [61], [71], [72], [73], [74]. These databases used sequences collected mainly from GenBank  
4  
5  
6 372 (GenBank, RRID:SCR\_002760) [75], [76].

7  
8  
9 373 We used the R package SPIDER to identify potential mini-barcodes from these initial  
10  
11 374 reference databases. Our criteria were to identify regions of between 100 and 200 bp in  
12  
13 375 length (the maximum that can be reasonably amplified from many eDNA samples) that  
14 376 displayed high levels of inter-specific variation within the region, and that were flanked by  
15  
16 377 primer sites that were well-conserved across all taxa, but particularly across our six key  
17  
18 378 Tasmanian target species. For each gene, we conducted a sliding window analysis with  
19  
20  
21 379 window sizes of 100, 125, 150 and 175 bp, to identify potential mini-barcodes. For each  
22  
23 380 window, we evaluated the number of diagnostic nucleotides per window and the proportion  
24  
25 381 of zero non-conspecific K2P distances, to identify regions with high inter-specific variation,  
26  
27 382 that may be used to discriminate among species. Subsequently, we used further sliding  
28  
29 383 window analyses to identify conserved primer sites adjacent to candidate mini-barcode  
30  
31 384 regions. We used window sizes of 20, 25 and 30 bp to identify potential sites for primer  
32  
33 385 development. Of these, a window size of 20 gave the best results, so we adopted 20 bp as  
34  
35 386 the standard primer length.  
36  
37  
38  
39  
40  
41  
42

43 387 We were not able to identify any candidate mini-barcode markers that met all of our  
44  
45 388 criteria from the 16S rRNA and ND2 genes, so all subsequent work was focused on the 12S  
46  
47 389 rRNA gene.  
48  
49  
50

### 51 390 **Development of a reference database for the 12S rRNA gene**

52  
53  
54

55 391 We constructed a reference database for the 12S rRNA gene. This included  
56  
57 392 representatives of native and introduced Tasmanian mammal predators and their potential  
58  
59 393 prey species, their mainland Australian relatives, livestock and other introduced species (i.e.  
60  
61  
62  
63  
64  
65

394 goat, sheep, horse, wild boar, cow and fallow deer) and humans. Importantly, all six  
395 recognised quoll species (four Australian and two New Guinean) were represented  
396 (Additional files 1 and 2). The final reference database consisted of 174 sequences  
397 representing 41 species from 24 genera. We obtained the majority of sequences from  
398 GenBank, but we generated additional sequences from a selection of species that were  
399 under-represented in the public database. DNA was extracted from tissue samples from  
400 museum specimens, road-killed animals, and western quoll tissues collected during a  
401 reintroduction program in the Flinders Ranges (South Australia) involving quolls of Western  
402 Australian origin [77]. We used a salting out method [78] with minor modifications as  
403 follows. Our lysis buffer included 10% SDS and tissues were digested in a thermomixer for  
404 three hours at 56 °C with mixing at 500 rpm. DNA pellets were air dried for 30-60 minutes  
405 and re-suspended in 50 µl of ddH<sub>2</sub>O. Genomic DNA extracts were quantified using a  
406 Nanodrop ND1000 spectrophotometer (Thermo Fischer Scientific) and samples were diluted  
407 with ddH<sub>2</sub>O to a final concentration of *ca* 40 ng/ µl. The entire 12S gene region was  
408 amplified by PCR using primers 12C and 12gg (Table 4). PCRs of 25 µl final volume contained  
409 0.4 µM of each primer, 1x MyTaq™ red mix (Bioline) and *ca* 3.2 ng/ µl of genomic DNA.  
410 Cycling conditions were: 95 °C for 2 mins; ten cycles of 95 °C for 20 s, a touchdown from 60  
411 °C - 50 °C for 20 s, and 72 °C for 1 min; then 35 cycles of 95 °C for 20 s, 50 °C for 20 s, and 72  
412 °C for 1 min; followed by a final extension at 72 °C for 4 mins. PCR products were visualised  
413 on a 1.7% TBE agarose gel (Agarose I: Amresco, Solon, OH, USA) run for 40 mins at 90 V.  
414 Hyperladder 50 bp (Bioline, Australia) was included to serve as a size reference. Amplicons  
415 were cleaned using Diffinity rapid tips (Scientific Specialties, Inc., California, USA) and  
416 prepared for sequencing following protocols recommended by the Biomolecular Resource  
417 Facility (Australian National University) before being sequenced in both directions on a 96

418 capillary 3730 DNA Analyzer (Applied Biosystems). Forward and reverse sequences for each  
 419 sample were manually checked, trimmed of primer sequences and low quality bases at the  
 420 3' ends, and aligned using Geneious 8.1.7 (Biomatters, Auckland, New Zealand) [79]. The  
 421 final alignment was 901 bp in length.

422 **Table 4: PCR primers used in this study.**

| Marker                | Sequence (5' – 3')                  | Amplicon length | Reference  |
|-----------------------|-------------------------------------|-----------------|------------|
| <b>12C &amp; 12GG</b> | 12C: AAAGCAAARCACTGAAAATG           | 1061 bp         | [80]       |
|                       | 12GG: TRGGTGTARGCTRRRTGCTTT         |                 |            |
| <b>AusPreda_12S</b>   | AusPreda_12SF: CCAGCCACCGCGGTCATACG | 218 bp          | This study |
|                       | AusPreda_12SR: GCATAGTGGGGTCTCTAATC |                 |            |

#### 423 **Development of primers for the mini-barcode**

424 A sliding window analysis of our 12S rRNA reference database, using the R package  
 425 SPIDER [47], identified a candidate mini-barcode of 344 bp in length. The proportion of zero  
 426 non-conspecific K2P distances was equal to zero for bases 66 to 410 of our alignment, using  
 427 a sliding window analysis with 175 bp windows, and each window included high numbers of  
 428 diagnostic nucleotides (51-69 per window). Within this candidate mini-barcode, a sliding  
 429 window analysis using 20 bp windows identified two short, highly conserved regions suitable  
 430 for primer design (Figure 2 and Additional file 3). These potential primer sites had a high  
 431 proportion of zero non-conspecific K2P distances (>0.8) and low numbers of diagnostic  
 432 nucleotides (0-1 per window). Within these regions, we manually designed the primers  
 433 *AusPreda\_12SF* (5'-CCAGCCACCGCGGTCATACG-3') and *AusPreda\_12SR* (5'-  
 434 GCATAGTGGGGTCTCTAATC-3') (Table 4). These primers flank a region of high inter-specific  
 435 variation and amplify a product of 218 bp in length (178 bp excluding primers).

#### 436 **Bioinformatic evaluation of the mini-barcode**

437 We used additional functions of the R package SPIDER to estimate the risks of species  
1  
2 438 mis-identification when using our *AusPreda\_12S* primers on samples of unknown origin.  
3  
4  
5 439 These analyses were conducted using two versions of our 12S reference database, trimmed  
6  
7 440 to include only the 178 bp of sequences flanked by the *AusPreda\_12S* primers. The “FULL”  
8  
9  
10 441 database included all 174 sequences present in the original database (Additional file 4). The  
11  
12  
13 442 “UNIQUE” database was a subset of the “FULL” database in which each haplotype was  
14  
15 443 represented by only a single sequence, and in which singleton species (species represented  
16  
17  
18 444 by only one haplotype) were removed. This included 44 sequences representing 16 species  
19  
20 445 from 12 genera (Additional file 5).  
21  
22  
23

24 446 Pairwise genetic distance was calculated for each pair of sequences using the “raw”  
25  
26 447 model. We conducted bioinformatic analyses using the *nearNeighbour*, *bestCloseMatch*, and  
27  
28  
29 448 *threshID* functions to identify the taxa most likely to be misidentified or ambiguously  
30  
31  
32 449 identified using our primers. R code for these analyses is provided in Additional file 6. The  
33  
34 450 *nearNeighbour* function determines, for each sequence in the reference database, whether  
35  
36  
37 451 the most closely related sequence originates from a conspecific, with two outcomes  
38  
39  
40 452 possible: “true” or “false”. A genetic distance threshold must be specified for the  
41  
42 453 *bestCloseMatch* and *threshID* functions to account for intra-specific variation. We estimated  
43  
44  
45 454 the most appropriate genetic thresholds to use for the “UNIQUE” and “FULL” databases to  
46  
47 455 be 3.5% and 1% respectively based on the thresholds with the lowest cumulative error. The  
48  
49  
50 456 *bestCloseMatch* analysis identified the most closely related sequence, within the specified  
51  
52 457 genetic distance threshold, and its species of origin, for each query sequence. The *threshID*  
53  
54  
55 458 analysis extended this, to consider species of origin for all sequences within the genetic  
56  
57  
58 459 distance threshold. These analyses had four possible outcomes: “correct”, “incorrect”,  
59  
60  
61  
62  
63  
64  
65

460 “ambiguous” and “no identification” [47]. The “FULL” database was also analysed with a  
461 3.5% genetic threshold to allow for comparison with the results of the “UNIQUE” database.

### 462 **Evaluation of the amplification success and sensitivity of the *AusPreda\_12S* primers**

463 We screened a panel of DNA samples from 45 specimens representing 40 species  
464 (Additional file 8) to evaluate amplification success of the *AusPreda\_12S* primers. DNA was  
465 extracted from tissue samples as described above, and amplified with the *AusPreda\_12S*  
466 primers using the same cycling conditions as for the 12C and 12gg primers above, with PCR  
467 products visualised on a 1.7% TBE agarose gel to determine amplification success (Figure 1).

468 To test the sensitivity of our primers to detect low template DNA samples, we set up  
469 serial dilutions of six DNA extracts originating from museum samples, representing each of  
470 the six mammal predators that might be detected in Tasmania (Tasmanian devil, eastern  
471 quoll, spotted tail quoll, cat, dog and fox). The DNA concentration of each original DNA  
472 extraction was determined using a QuBit Fluorometer and the Qubit dsDNA BR Assay Kit  
473 (Thermo Fisher) and diluted with ddH<sub>2</sub>O if necessary to obtain a starting concentration of 90  
474 ng /  $\mu$ l. We then set up a series of six 10 X dilutions from each of these “undiluted” (90 ng /  
475  $\mu$ l) samples. For each dilution of each sample, we performed three qPCR replicates, each  
476 with a total volume of 25 $\mu$ l including 1X Gold buffer (Applied Biosystems), 2 mM MgCl<sub>2</sub>, 0.4  
477 mg / ml BSA, 0.4  $\mu$ M of each primer, 0.6  $\mu$ l SYBR green (1:2000 Life Technologies nucleic acid  
478 gel stain), 0.25 mM of each dNTP, 1 unit of AmpliTaq Gold™ (Applied Biosystems) and 2  $\mu$ l of  
479 the appropriate DNA dilution. qPCRs were conducted using a Vii7 Real-Time PCR system  
480 (Thermo Fisher Scientific) with an initial step of 95 °C for 5 mins; followed by 40 cycles of 95  
481 °C for 30 s, 57 °C for 30 s and 72 ° for 30 s. We conducted a comparative CT analysis using

1  
2  
3 482 the ViiA7 software v1.2.4, with a threshold of 5,000  $\Delta R_n$ . For each dilution of each DNA  
4  
5 483 sample we calculated the mean CT value and the standard deviation across PCR replicates<sup>2</sup>.

#### 6 484 **Evaluation of amplification success from trace samples using known-origin scats**

7  
8  
9 485 We used previously-extracted DNA from 57 scats of known-origin collected in 2010-  
10  
11 486 2011 from captive animals, including eastern quolls, spotted-tailed quolls, Tasmanian devils,  
12  
13 487 foxes, cats and dogs. DNA was extracted using a combined chelex (Bio Rad Laboratories,  
14  
15 488 Hercules, California, USA) and spin column (Mega quick-spin Total Fragment DNA  
16  
17 489 Purification Kit, Intron Biotechnology) methods [81]. We evaluated amplification success  
18  
19 490 from these samples using the *AusPreda\_12S* primers, by conducting PCRs and visualising PCR  
20  
21 491 products by gel electrophoresis as described above.  
22  
23  
24  
25  
26  
27

28 492 All amplified products were sequenced in both directions using the *AusPreda\_12S*  
29  
30 493 primers, following the methods described above for primers 12C and 12gg. Forward and  
31  
32 494 reverse reads were aligned in Geneious 8.1.7 using a global alignment with free end gaps  
33  
34 495 (Geneious alignment) allowing 65% similarity. Primers were trimmed and a consensus  
35  
36 496 sequence was generated for each sample. Consensus sequences were compared against the  
37  
38 497 GenBank database using nucleotide BLAST ( NCBI BLAST, RRID:SCR\_004870, MEGABLAST  
39  
40 498 with the “nr” option and a maximum hit of 20) to identify the most likely species of origin.  
41  
42  
43  
44  
45  
46

#### 47 499 **Availability of supporting data and material**

48  
49  
50 500 The datasets and R code associated with this article are provided as supporting information.  
51  
52 501 All DNA sequences generated during this study have been submitted to GenBank: accession  
53  
54 502 numbers KX786294 to KX786344. Details on the method used to evaluate the sensitivity of a mini-  
55  
56 503 barcode can also be found in Protocols.io [82].  
57  
58  
59  
60  
61  
62  
63  
64  
65

1  
2  
3 504 *Additional file 1:* 12S rRNA reference sequence database used for primer design (FASTA  
4  
5  
6 505 format)  
7  
8  
9 506 *Additional file 2:* Samples included in the 12S rRNA reference sequence database used for  
10  
11 507 primer design (.csv format)  
12  
13 508 *Additional file 3:* R code for sliding windows analysis implemented using SPIDER (text format)  
14  
15 509 *Additional file 4:* Reference database used for genetic distance based evaluation of the  
16  
17 510 *AusPreda\_12S* mini-barcode: “FULL” database (FASTA format)  
18  
19  
20 511 *Additional file 5:* Reference database used for genetic distance based evaluation of the  
21  
22 512 *AusPreda\_12S* mini-barcode: “UNIQUE” database (FASTA format)  
23  
24  
25 513 *Additional file 6:* R code for genetic distance based evaluation of the *AusPreda\_12S* mini-  
26  
27 514 barcode implemented using SPIDER (text format)  
28  
29  
30  
31 515 *Additional file 7:* Detailed results of genetic distance based evaluation of the *AusPreda\_12S*  
32  
33 516 mini-barcode (.csv format)  
34  
35  
36  
37 517 *Additional file 8:* Samples included in the laboratory evaluation of the *AusPreda\_12S* mini-  
38  
39 518 barcode (.csv format)  
40  
41  
42  
43 519 *Additional file 9:* Consensus sequences obtained from 53 known-origin scats by amplification  
44  
45 520 with the *AusPreda\_12S* mini-barcode (FASTA format)  
46  
47

#### 48 **List of abbreviations**

49  
50  
51 522 BLAST: Basic Local Alignment Search Tool: Tool available through NCBI to compare an  
52  
53 523 unknown sequence to existing sequences in a public database.  
54  
55  
56  
57 524 bp: base pairs: pairs of nucleotides in a DNA or RNA strand  
58  
59  
60  
61  
62  
63  
64  
65



1 525 CT value: cycle threshold: the number of cycles required for the fluorescent signal of a qPCR

2 machine to cross the predetermined threshold.

3 526

4

5 527 DNA: deoxyribonucleic acid

6

7

8 528 mtDNA: mitochondrial DNA

9

10

11 529 eDNA: environmental DNA

12

13

14

15 530 PCR: polymerase chain reaction, a method used to amplify a target DNA or RNA strand

16

17

18 531 rRNA: ribosomal ribonucleic acid

19

20

21 532 TBE: Tris/Borate/EDTA: buffer for gel electrophoresis

22

23

24 533 **Consent for publication**

25

26

27 534 Not applicable

28

29

30 535 **Competing interests**

31

32

33 536 The authors declare that they have no competing interests.

34

35

36 537 **Funding**

37

38

39

40 538 This study was funded by the Invasive Animals Cooperative Research Centre as part of

41

42 539 project 1.L.21.

43

44

45 540 **Authors' contributions**

46

47

48 541 EM, AM and SS designed the study. EM performed the experiments. EM and AM analysed

49

50

51 542 the data. EM wrote the manuscript and AM and SS provided extensive comments. All

52

53

54 543 authors read and approved the final manuscript.

55

56

57 544 **Acknowledgements**

545 Thanks to the following for providing samples: Alison Taylor (Kippax Veterinary Hospital);  
546 Kejun Wei (Australian National University); Sally Bryant, Elise Dewar and Michael Driessen  
(Department of Primary Industries, Parks, Water and Environment, Tasmania); Shane  
548 McHugh (Tasmanian Land Conservancy); Judy Dunlop (Department of Parks and Wildlife,  
Western Australia); Leo Joseph and Robert Palmer (Australian National Wildlife Collection,  
CSIRO); Melissa Jensen (University of Adelaide); Catriona Campbell and Matthew Young  
(University of Canberra); Tony Buckmaster (University of Sydney); Shane Jackson (University  
of Tasmania); Phil Newman (Rugosa Park Alpacas); Conrad Barr; The Australian Museum;  
Museum Victoria; The Tasmanian Museum and Art Gallery; The Queen Victoria Museum and  
Art Gallery. Special thanks to Tony Buckmaster, Arthur Georges and members of the Invasive  
Animals CRC's 2016 Kioloa writing workshop as well as Stephen Harris for helpful  
suggestions.

## 557 REFERENCES

- [1] G. Ceballos, P. R. Ehrlich, A. D. Barnosky, A. García, R. M. Pringle, and T. M. Palmer, "Accelerated modern human-induced species losses: Entering the sixth mass extinction," *Sci. Adv.*, vol. 1, no. 5, p. e1400253, 2015.
- [2] S. Boyer, S. D. J. Brown, R. A. Collins, R. H. Cruickshank, M.-C. Lefort, J. Malumbres-Olarte, and S. D. Wratten, "Sliding window analyses for optimal selection of mini-barcodes, and application to 454-pyrosequencing for specimen identification from degraded DNA," *PLoS One*, vol. 7, no. 5, 2012.
- [3] I. Meusnier, G. A. C. Singer, J.-F. Landry, D. A. Hickey, P. D. N. Hebert, and M. Hajibabaei, "A universal DNA mini-barcode for biodiversity analysis," *BMC Genomics*, vol. 9, no. 1, p. 214, 2008.
- [4] A. Alberdi, I. Garin, O. Aizpurua, and J. Aihartza, "The foraging ecology of the mountain long-eared bat *Plecotus macrobullaris* revealed with DNA mini-barcodes," *PLoS One*, vol. 7, no. 4, p. e35692, 2012.
- [5] W. J. Kress, C. García-Robledo, M. Uriarte, and D. L. Erickson, "DNA barcodes for ecology, evolution, and conservation," *Trends Ecol. Evol.*, no. 0, 2015.
- [6] O. Berry and S. D. Sarre, "Gel-free species identification using melt-curve analysis," *Mol. Ecol. Notes*, vol. 7, no. 1, pp. 1–4, 2007.
- [7] T. M. Wilcox, K. S. McKelvey, M. K. Young, S. F. Jane, W. H. Lowe, A. R. Whiteley, and M. K. Schwartz, "Robust detection of rare species using environmental DNA: the importance of primer specificity," *PLoS One*, vol. 8, no. 3, p. e59520, 2013.

- 578 [8] H. C. Rees, B. C. Maddison, D. J. Middleditch, J. R. M. Patmore, and K. C. Gough, "REVIEW: The  
1 579 detection of aquatic animal species using environmental DNA—a review of eDNA as a survey  
2 580 tool in ecology," *J. Appl. Ecol.*, vol. 51, no. 5, pp. 1450–1459, 2014.
- 3  
4 581 [9] O. Berry, S. D. Sarre, L. Farrington, and N. Aitken, "Faecal DNA detection of invasive species:  
5 582 The case of feral foxes in Tasmania," *Wildl. Res.*, vol. 34, no. 1, pp. 1–7, 2007.
- 6  
7 583 [10] J. M. Korstian, A. M. Hale, V. J. Bennett, and D. A. Williams, "Using DNA barcoding to improve  
8 584 bat carcass identification at wind farms in the United States," *Conserv. Genet. Resour.*, pp. 1–  
9 585 8, 2015.
- 10  
11 586 [11] W. Shehzad, T. M. McCarthy, F. Pompanon, L. Purevjav, E. Coissac, T. Riaz, and P. Taberlet,  
12 587 "Prey preference of snow leopard (*Panthera uncia*) in South Gobi, Mongolia," *PLoS One*, vol.  
13 588 7, no. 2, p. e32104, 2012.
- 14  
15 589 [12] M. Koester, S. Claßen, and R. Gergs, "Establishment of group-specific PCR primers for the  
16 590 identification of freshwater macroinvertebrates," *Conserv. Genet. Resour.*, vol. 5, no. 4, pp.  
17 591 1091–1093, 2013.
- 18  
19 592 [13] S. K. Gupta and A. Kumar, "Molecular identification of man-eating carnivores from scat  
20 593 samples," *Conserv. Genet. Resour.*, vol. 6, no. 2, pp. 271–274, 2014.
- 21  
22 594 [14] F. Grattarola, S. González, and M. Cosse, "A novel primer set for mammal species  
23 595 identification from feces samples," *Conserv. Genet. Resour.*, vol. 7, no. 1, pp. 57–59, 2015.
- 24  
25 596 [15] C. Shores, S. Mondol, and S. K. Wasser, "Comparison of DNA and hair-based approaches to  
26 597 dietary analysis of free-ranging wolves (*Canis lupus*)," *Conserv. Genet. Resour.*, vol. 7, no. 4,  
27 598 pp. 871–878, 2015.
- 28  
29 599 [16] T. Takahara, T. Minamoto, and H. Doi, "Using environmental DNA to estimate the distribution  
30 600 of an invasive fish species in ponds," *PLoS One*, vol. 8, no. 2, p. e56584, 2013.
- 31  
32 601 [17] A. Fujiwara, S. Matsushashi, H. Doi, S. Yamamoto, and T. Minamoto, "Use of environmental  
33 602 DNA to survey the distribution of an invasive submerged plant in ponds," *Freshw. Sci.*, vol. 35,  
34 603 no. 2, p. 0, 2016.
- 35  
36 604 [18] B. E. Deagle, J. P. Eveson, and S. N. Jarman, "Quantification of damage in DNA recovered from  
37 605 highly degraded samples - A case study on DNA in faeces," *Front. Zool.*, vol. 3, 2006.
- 38  
39 606 [19] M. Hajibabaei, M. Smith, D. H. Janzen, J. J. Rodriguez, J. B. Whitfield, and P. D. N. Hebert, "A  
40 607 minimalist barcode can identify a specimen whose DNA is degraded," *Mol. Ecol. Notes*, vol. 6,  
41 608 no. 4, pp. 959–964, 2006.
- 42  
43 609 [20] A. Valentini, F. Pompanon, and P. Taberlet, "DNA barcoding for ecologists," *Trends Ecol. Evol.*,  
44 610 vol. 24, no. 2, pp. 110–117, 2009.
- 45  
46 611 [21] A. R. Bahrmann, H. Madani, V. V Bakayev, M. H. Babaei, G. Samar, and V. Anashchenko,  
47 612 "Polymerase chain reaction of bacterial genomes with single universal primer: application to  
48 613 distinguishing mycobacteria species," *Mol. Cell. Probes*, vol. 10, no. 2, pp. 117–122, 1996.
- 49  
50 614 [22] R. Meier, K. Shiyang, G. Vaidya, and P. K. L. Ng, "DNA barcoding and taxonomy in Diptera: a  
51 615 tale of high intraspecific variability and low identification success," *Syst. Biol.*, vol. 55, no. 5,  
52 616 pp. 715–728, 2006.
- 53  
54 617 [23] R. Boutros, N. Stokes, M. Bekaert, and E. C. Teeling, "UniPrime2: a web service providing  
55 618 easier Universal Primer design," *Nucleic Acids Res.*, p. gkp269, 2009.
- 56  
57 619 [24] E. M. Furlan, D. Gleeson, C. M. Hardy, and R. P. Duncan, "A framework for estimating the  
58 620 sensitivity of eDNA surveys," *Mol. Ecol. Resour.*, 2015.
- 59  
60 621 [25] A. J. Macdonald and S. D. Sarre, "A framework for developing and validating taxon-specific  
61 622 primers for specimen identification from environmental DNA," *Mol. Ecol. Resour.*, 2016.

- 623 [26] R. E. Wheat, J. M. Allen, S. D. L. Miller, C. C. Wilmers, and T. Levi, "Environmental DNA from  
1 624 residual saliva for efficient noninvasive genetic monitoring of brown bears (*Ursus arctos*),"  
2 625 *PLoS One*, vol. 11, no. 11, p. e0165259, 2016.
- 3  
4 626 [27] D. J. Morin, M. J. Kelly, and L. P. Waits, "Monitoring coyote population dynamics with fecal  
5 627 DNA and spatial capture–recapture," *J. Wildl. Manage.*, vol. 80, no. 5, pp. 824–836, 2016.
- 6  
7 628 [28] J. C. Z. Woinarski, A. A. Burbidge, and P. L. Harrison, "Ongoing unraveling of a continental  
8 629 fauna: decline and extinction of Australian mammals since European settlement," *Proc. Natl.  
9 630 Acad. Sci.*, vol. 112, no. 15, pp. 4531–4540, 2015.
- 10  
11 631 [29] A. A. Burbidge and N. L. McKenzie, "Patterns in the modern decline of Western Australia's  
12 632 vertebrate fauna: causes and conservation implications," *Biol. Conserv.*, vol. 50, no. 1–4, pp.  
13 633 143–198, 1989.
- 14  
15 634 [30] A. P. Elkin, "Reaction and interaction: a food gathering people and European settlement in  
16 635 Australia," *Am. Anthropol.*, vol. 53, no. 2, pp. 164–186, 1951.
- 17  
18 636 [31] O. J. F. Brown, "Tasmanian devil (*Sarcophilus harrisii*) extinction on the Australian mainland in  
19 637 the mid-Holocene: multicausality and ENSO intensification," *Alcheringa An Australas. J.  
20 638 Palaeontol.*, vol. 30, no. S1, pp. 49–57, 2006.
- 21  
22 639 [32] F. W. King, "Extant unless proven extinct: the international legal precedent," *Conserv. Biol.*,  
23 640 vol. 2, no. 4, pp. 395–397, 1988.
- 24  
25 641 [33] R. Paddle, *The last Tasmanian tiger: the history and extinction of the thylacine*. Cambridge  
26 642 University Press, 2002.
- 27  
28 643 [34] T. Hollings, M. Jones, N. Mooney, and H. McCallum, "Trophic Cascades Following the Disease-  
29 644 Induced Decline of an Apex Predator, the Tasmanian Devil," *Conserv. Biol.*, 2013.
- 30  
31 645 [35] A. Brüniche-Olsen, C. P. Burridge, J. J. Austin, and M. E. Jones, "Disease induced changes in  
32 646 gene flow patterns among Tasmanian devil populations," *Biol. Conserv.*, vol. 165, pp. 69–78,  
33 647 2013.
- 34  
35 648 [36] H. S. Bender, J. A. Marshall Graves, and J. E. Deakin, "Pathogenesis and molecular biology of a  
36 649 transmissible tumor in the Tasmanian devil," *Annu. Rev. Anim. Biosci.*, vol. 2, no. 1, pp. 165–  
37 650 187, 2014.
- 38  
39 651 [37] S. Burnett, "Colonizing cane toads cause population declines in native predators: reliable  
40 652 anecdotal information and management implications," *Pacific Conserv. Biol.*, vol. 3, no. 1, p.  
41 653 65, 1997.
- 42  
43 654 [38] C. A. Belcher, "Demographics of tiger quoll (*Dasyurus maculatus maculatus*) populations in  
44 655 south-eastern Australia," *Aust. J. Zool.*, vol. 51, no. 6, pp. 611–626, Jan. 2003.
- 45  
46 656 [39] A. S. Glen, P. J. de Tores, D. R. Sutherland, and K. D. Morris, "Interactions between chuditch  
47 657 (*Dasyurus geoffroii*) and introduced predators: a review," *Australian Journal of Zoology*, vol.  
48 658 57, no. 5. pp. 347–356, 2009.
- 49  
50 659 [40] B. A. Fancourt, C. E. Hawkins, and S. C. Nicol, "Evidence of rapid population decline of the  
51 660 eastern quoll (*Dasyurus viverrinus*) in Tasmania," *Aust. Mammal.*, vol. 35, no. 2, pp. 195–205,  
52 661 2013.
- 53  
54 662 [41] S. D. Sarre, A. J. Macdonald, C. Barclay, G. R. Saunders, and D. S. L. Ramsey, "Foxes are now  
55 663 widespread in Tasmania: DNA detection defines the distribution of this rare but invasive  
56 664 carnivore," *J. Appl. Ecol.*, vol. 50, no. 2, pp. 459–468, 2013.
- 57  
58 665 [42] M. Nogales, A. Martín, B. R. Tershy, C. J. Donlan, D. Veitch, N. Puerta, B. Wood, and J. Alonso,  
59 666 "A review of feral cat eradication on islands," *Conserv. Biol.*, vol. 18, no. 2, pp. 310–319, 2004.
- 60  
61 667 [43] B. T. Lazenby, N. J. Mooney, and C. R. Dickman, "Effects of low-level culling of feral cats in

- 668 open populations: a case study from the forests of southern Tasmania," *Wildl. Res.*, vol. 41,  
1 669 no. 5, pp. 407–420, 2015.
- 2  
3 670 [44] A. R. Palumbi and F. Cipriano, "Species identification using genetic tools: the value of nuclear  
4 671 and mitochondrial gene sequences in whale conservation," *J. Hered.*, vol. 89, no. 5, pp. 459–  
5 672 464, 1998.
- 6  
7 673 [45] D. M. Hillis, C. Moritz, B. K. Mable, and R. G. Olmstead, *Molecular systematics*, vol. 23. Sinauer  
8 674 Associates Sunderland, MA, 1996.
- 9  
10 675 [46] A. J. MacDonald and S. D. Sarre, "Species assignment from trace DNA sequences: an in silico  
11 676 assessment of the test used to survey for foxes in Tasmania," *J. Appl. Ecol.*, p. n/a-n/a, Jul.  
12 677 2015.
- 13  
14 678 [47] S. D. J. Brown, R. A. Collins, S. Boyer, M. LEFORT, J. MALUMBRES-OLARTE, C. J. Vink, and R. H.  
15 679 Cruickshank, "Spider: an R package for the analysis of species identity and evolution, with  
16 680 particular reference to DNA barcoding," *Mol. Ecol. Resour.*, vol. 12, no. 3, pp. 562–565, 2012.
- 17  
18 681 [48] P. A. Woolley, C. Krajewski, and M. Westerman, "Phylogenetic relationships within *Dasyurus*  
19 682 (*Dasyuromorphia*: *Dasyuridae*): quoll systematics based on molecular evidence and male  
20 683 characteristics," *J. Mammal.*, vol. 96, no. 1, pp. 37–46, Mar. 2015.
- 21  
22 684 [49] M. K. Schwartz, G. Luikart, and R. S. Waples, "Genetic monitoring as a promising tool for  
23 685 conservation and management," *Trends Ecol. Evol.*, vol. 22, no. 1, pp. 25–33, 2007.
- 24  
25 686 [50] J. A. Darling and M. J. Blum, "DNA-based methods for monitoring invasive species: a review  
26 687 and prospectus," *Biol. Invasions*, vol. 9, no. 7, pp. 751–765, 2007.
- 27  
28 688 [51] A. D. Bastos, D. Nair, P. J. Taylor, H. Brettschneider, F. Kirsten, E. Mostert, E. Von Maltitz, J. M.  
29 689 Lamb, P. Van Hooft, and S. R. Belmain, "Genetic monitoring detects an overlooked cryptic  
30 690 species and reveals the diversity and distribution of three invasive *Rattus* congeners in South  
31 691 Africa," *BMC Genet.*, vol. 12, no. 1, p. 1, 2011.
- 32  
33 692 [52] C. L. Jerde, A. R. Mahon, W. L. Chadderton, and D. M. Lodge, "'Sight-unseen' detection of rare  
34 693 aquatic species using environmental DNA," *Conserv. Lett.*, vol. 4, no. 2, pp. 150–157, 2011.
- 35  
36 694 [53] N. Fernández, M. Delibes, and F. Palomares, "Landscape evaluation in conservation: molecular  
37 695 sampling and habitat modeling for the Iberian lynx," *Ecol. Appl.*, vol. 16, no. 3, pp. 1037–1049,  
38 696 2006.
- 39  
40 697 [54] K. S. McKelvey, J. V. O. N. Kienast, K. B. Aubry, G. M. Koehler, B. T. Maletzke, J. R. Squires, E. L.  
41 698 Lindquist, S. Loch, and M. K. Schwartz, "DNA analysis of hair and scat collected along snow  
42 699 tracks to document the presence of Canada lynx," *Wildl. Soc. Bull.*, vol. 34, no. 2, pp. 451–455,  
43 700 2006.
- 44  
45 701 [55] R. Hausknecht, R. Gula, B. Pirga, and R. Kuehn, "Urine—a source for noninvasive genetic  
46 702 monitoring in wildlife," *Mol. Ecol. Notes*, vol. 7, no. 2, pp. 208–212, 2007.
- 47  
48 703 [56] Y.-C. Cheng and C.-P. Lin, "Dietary Niche Partitioning of *Euphaea formosa* and *Matrona*  
49 704 *cyanoptera* (Odonata: Zygoptera) on the Basis of DNA Barcoding of Larval Feces," *J. Insect Sci.*,  
50 705 vol. 16, no. 1, p. 73, 2016.
- 51  
52 706 [57] P. Savolainen, T. Leitner, A. N. Wilton, E. Matisoo-Smith, and J. Lundeberg, "A detailed picture  
53 707 of the origin of the Australian dingo, obtained from the study of mitochondrial DNA," *Proc.*  
54 708 *Natl. Acad. Sci. U. S. A.*, vol. 101, no. 33, pp. 12387–12390, 2004.
- 55  
56 709 [58] C. G. Radford, M. Letnic, M. Fillios, and M. S. Crowther, "An assessment of the taxonomic  
57 710 status of wild canids in south-eastern New South Wales: phenotypic variation in dingoes,"  
58 711 *Aust. J. Zool.*, vol. 60, no. 2, pp. 73–80, 2012.
- 59  
60 712 [59] W. O. C. Symondson, "Molecular identification of prey in predator diets," *Mol. Ecol.*, vol. 11,  
61 713 no. 4, pp. 627–641, 2002.

- 714 [60] S. N. Jarman, B. E. Deagle, and N. J. Gales, "Group-specific polymerase chain reaction for DNA-  
1 715 based analysis of species diversity and identity in dietary samples," *Mol. Ecol.*, vol. 13, no. 5,  
2 716 pp. 1313–1322, 2004.
- 3  
4 717 [61] B. E. Deagle, D. J. Tollit, S. N. Jarman, M. A. Hindell, A. W. Trites, and N. J. Gales, "Molecular  
5 718 scatology as a tool to study diet: analysis of prey DNA in scats from captive Steller sea lions,"  
6 719 *Mol. Ecol.*, vol. 14, no. 6, pp. 1831–1842, 2005.
- 7  
8 720 [62] A. Galimberti, A. Sandionigi, A. Bruno, A. Bellati, and M. Casiraghi, "DNA barcoding in  
9 721 mammals: what's new and where next?," *Hystrix, Ital. J. Mammal.*, vol. 26, no. 1, pp. 13–24,  
10 722 2015.
- 11  
12 723 [63] K. Morris, B. Johnson, P. Orell, G. Gaikhorst, A. Wayne, and D. Moro, "Recovery of the  
13 724 threatened chuditch (*Dasyurus geoffroii*): a case study," *Predators with Pouches Biol. Carniv.*  
14 725 *Marsupials. CSIRO Publ. Melb.*, pp. 435–451, 2003.
- 15  
16 726 [64] Department of the Environment, "Western quolls – Reintroducing the species to the Flinders  
17 727 Ranges (SA)," 2015. [Online]. Available:  
18 728 [http://www.environment.gov.au/biodiversity/threatened/publications/factsheet-western-](http://www.environment.gov.au/biodiversity/threatened/publications/factsheet-western-quolls)  
19 729 [quolls](http://www.environment.gov.au/biodiversity/threatened/publications/factsheet-western-quolls).
- 20  
21 730 [65] S. Katsineris, "Endangered Quolls re-introduced to the flinders ranges," 2015.
- 22  
23 731 [66] E. Hunt, "Eastern quolls return to Australian mainland after more than 50 years," *The*  
24 732 *Guardian*, 02-Mar-2016.
- 25  
26 733 [67] A. S. Glen and C. R. Dickman, "Complex interactions among mammalian carnivores in  
27 734 Australia, and their implications for wildlife management," *Biol. Rev. Camb. Philos. Soc.*, vol.  
28 735 80, no. 3, pp. 387–401, 2005.
- 29  
30 736 [68] C. N. Johnson and J. VanDerWal, "Evidence that dingoes limit abundance of a mesopredator in  
31 737 eastern Australian forests," *J. Appl. Ecol.*, vol. 46, no. 3, pp. 641–646, 2009.
- 32  
33 738 [69] E. G. Ritchie and C. N. Johnson, "Predator interactions, mesopredator release and biodiversity  
34 739 conservation," *Ecol. Lett.*, vol. 12, pp. 982–998, 2009.
- 35  
36 740 [70] D. O. Hunter, T. Britz, M. Jones, and M. Letnic, "Reintroduction of Tasmanian devils to  
37 741 mainland Australia can restore top-down control in ecosystems where dingoes have been  
38 742 extirpated," *Biol. Conserv.*, vol. 191, pp. 428–435, 2015.
- 39  
40 743 [71] A. Di Finizio, G. Guerriero, G. L. Russo, and G. Ciarcia, "Identification of gadoid species (Pisces,  
41 744 Gadidae) by sequencing and PCR–RFLP analysis of mitochondrial 12S and 16S rRNA gene  
42 745 fragments," *Eur. Food Res. Technol.*, vol. 225, no. 3–4, pp. 337–344, 2007.
- 43  
44 746 [72] F. Pompanon, B. E. Deagle, W. O. C. Symondson, D. S. Brown, S. N. Jarman, and P. Taberlet,  
45 747 "Who is eating what: diet assessment using next generation sequencing," *Mol. Ecol.*, vol. 21,  
46 748 no. 8, pp. 1931–1950, 2012.
- 47  
48 749 [73] P. Taberlet, E. Coissac, F. Pompanon, C. Brochmann, and E. Willerslev, "Towards next-  
49 750 generation biodiversity assessment using DNA metabarcoding," *Mol. Ecol.*, vol. 21, no. 8, pp.  
50 751 2045–2050, 2012.
- 51  
52 752 [74] B. E. Deagle, S. N. Jarman, E. Coissac, F. Pompanon, and P. Taberlet, "DNA metabarcoding and  
53 753 the cytochrome c oxidase subunit I marker: not a perfect match," *Biol. Lett.*, vol. 10, no. 9, p.  
54 754 20140562, 2014.
- 55  
56 755 [75] NCBI, "National Center for Biotechnology Information." [Online]. Available:  
57 756 <http://www.ncbi.nlm.nih.gov/genbank/>.
- 58  
59 757 [76] L. Y. Geer, A. Marchler-Bauer, R. C. Geer, L. Han, J. He, S. He, C. Liu, W. Shi, and S. H. Bryant,  
60 758 "The NCBI biosystems database," *Nucleic Acids Res.*, p. gkp858, 2009.

759 [77] K. E. Moseby, D. E. Peacock, and J. L. Read, "Catastrophic cat predation: A call for predator  
1 760 profiling in wildlife protection programs," *Biol. Conserv.*, vol. 191, pp. 331–340, 2015.

2  
3 761 [78] A. J. MacDonald, S. D. Sarre, N. N. FitzSimmons, and N. Aitken, "Determining microsatellite  
4 762 genotyping reliability and mutation detection ability: an approach using small-pool PCR from  
5 763 sperm DNA," *Mol. Genet. Genomics*, vol. 285, no. 1, pp. 1–18, 2011.

6  
7 764 [79] M. Kearse, R. Moir, A. Wilson, S. Stones-Havas, M. Cheung, S. Sturrock, S. Buxton, A. Cooper,  
8 765 S. Markowitz, and C. Duran, "Geneious Basic: an integrated and extendable desktop software  
9 766 platform for the organization and analysis of sequence data," *Bioinformatics*, vol. 28, no. 12,  
10 767 pp. 1647–1649, 2012.

11  
12 768 [80] M. S. Springer, L. J. Hollar, and A. Burk, "Compensatory substitutions and the evolution of the  
13 769 mitochondrial 12S rRNA gene in mammals.," *Mol. Biol. Evol.*, vol. 12, no. 6, pp. 1138–1150,  
14 770 Nov. 1995.

15  
16 771 [81] D. S. L. Ramsey, A. J. MacDonald, S. Quasim, C. Barclay, and S. D. Sarre, "An examination of  
17 772 the accuracy of a sequential PCR and sequencing test used to detect the incursion of an  
18 773 invasive species: the case of the red fox in Tasmania," *J. Appl. Ecol.*, vol. 52, no. 3, pp. 562–  
19 774 570, 2015.

20  
21 775 [82] Modave E, MacDonald AJ, Sarre SD (2017): Evaluation of the sensitivity of a mini-barcode.  
22 776 Protocols.io. <http://dx.doi.org/10.17504/protocols.io.imecc3e>  
23  
24  
25 777  
26 778

16  
17  
18  
19  
20  
21  
22  
23  
24  
25  
26  
27  
28  
29  
30  
31  
32  
33  
34  
35  
36  
37  
38  
39  
40  
41  
42  
43  
44  
45  
46  
47  
48  
49  
50  
51  
52  
53  
54  
55  
56  
57  
58  
59  
60  
61  
62  
63  
64  
65

779 **TABLE**

780 Table 3: PCR and DNA sequencing results from 57 known-origin scat samples screened using the *AusPreda\_12S* mini-barcode.

| Sample    | Scientific name               | Common name          | Amplified | Sequenced | Closest sequence match using BLAST | % ID <sup>α</sup> | e value <sup>β</sup> |
|-----------|-------------------------------|----------------------|-----------|-----------|------------------------------------|-------------------|----------------------|
| 100111-27 | <i>Canis lupus familiaris</i> | Dog                  | Y         | Y         | Dog                                | 99.4              | 1.55E-84             |
| 120111-02 | <i>Canis lupus familiaris</i> | Dog                  | Y         | Y         | Dog                                | 100               | 6.52E-78             |
| 121010-11 | <i>Canis lupus familiaris</i> | Dog                  | Y         | Y         | Dog                                | 99.4              | 1.22E-85             |
| 121010-16 | <i>Canis lupus familiaris</i> | Dog                  | Y         | Y         | Dog                                | 98.4              | 2.08E-83             |
| 121010-17 | <i>Canis lupus familiaris</i> | Dog                  | Y         | Y         | Dog                                | 99.4              | 1.98E-83             |
| 121010-30 | <i>Canis lupus familiaris</i> | Dog                  | Y         | Y         | Dog                                | 99.4              | 5.54E-84             |
| 121010-52 | <i>Canis lupus familiaris</i> | Dog                  | Y         | <b>N</b>  | <b>NA</b>                          | <b>NA</b>         | <b>NA</b>            |
| 121010-53 | <i>Canis lupus familiaris</i> | Dog                  | Y         | Y         | Dog                                | 98.9              | 2.60E-82             |
| 121010-54 | <i>Canis lupus familiaris</i> | Dog                  | Y         | Y         | Dog                                | 99.4              | 1.22E-85             |
| 121010-56 | <i>Canis lupus familiaris</i> | Dog                  | Y         | Y         | Dog                                | 98.9              | 7.22E-83             |
| 121110-55 | <i>Canis lupus familiaris</i> | Dog                  | Y         | Y         | Dog                                | 99.4              | 5.54E-84             |
| 170211-12 | <i>Canis lupus familiaris</i> | Dog                  | <b>N</b>  | <b>NA</b> | <b>NA</b>                          | <b>NA</b>         | <b>NA</b>            |
| 041110-66 | <i>Dasyurus maculatus</i>     | Spotted-tailed quoll | Y         | Y         | Spotted-tailed quoll               | 98.4              | 2.08E-83             |
| 101110-9  | <i>Dasyurus maculatus</i>     | Spotted-tailed quoll | Y         | Y         | Spotted-tailed quoll               | 98.2              | 2.33E-72             |
| 170211-25 | <i>Dasyurus maculatus</i>     | Spotted-tailed quoll | Y         | Y         | Spotted-tailed quoll               | 99.4              | 1.55E-84             |
| 041110-01 | <i>Dasyurus viverrinus</i>    | Eastern quoll        | Y         | Y         | Eastern quoll                      | 99.4              | 2.25E-72             |
| 041110-04 | <i>Dasyurus viverrinus</i>    | Eastern quoll        | Y         | Y         | Eastern quoll                      | 100               | 2.05E-88             |
| 041110-07 | <i>Dasyurus viverrinus</i>    | Eastern quoll        | Y         | Y         | Eastern quoll                      | 100               | 4.80E-74             |
| 041110-15 | <i>Dasyurus viverrinus</i>    | Eastern quoll        | Y         | Y         | Eastern quoll                      | 100               | 1.01E-54             |
| 041110-74 | <i>Dasyurus viverrinus</i>    | Eastern quoll        | Y         | Y         | Eastern quoll                      | 100               | 1.19E-85             |
| 041110-80 | <i>Dasyurus viverrinus</i>    | Eastern quoll        | Y         | Y         | Eastern quoll                      | 100               | 9.34E-87             |
| 100111-05 | <i>Dasyurus viverrinus</i>    | Eastern quoll        | Y         | Y         | Eastern quoll                      | 100               | 3.34E-86             |
| 100111-31 | <i>Dasyurus viverrinus</i>    | Eastern quoll        | Y         | Y         | Eastern quoll                      | 100               | 3.34E-86             |



16  
17  
18  
19  
20  
21  
22  
23  
24  
25  
26  
27  
28  
29  
30  
31  
32  
33  
34  
35  
36  
37  
38  
39  
40  
41  
42  
43  
44  
45  
46  
47  
48  
49  
50  
51  
52  
53  
54  
55  
56  
57  
58  
59  
60  
61  
62  
63  
64  
65

|           |                             |                 |          |           |                 |           |           |
|-----------|-----------------------------|-----------------|----------|-----------|-----------------|-----------|-----------|
| 120111-32 | <i>Dasyurus viverrinus</i>  | Eastern quoll   | <b>N</b> | <b>NA</b> | <b>NA</b>       | <b>NA</b> | <b>NA</b> |
| 120111-33 | <i>Dasyurus viverrinus</i>  | Eastern quoll   | Y        | Y         | Eastern quoll   | 100       | 2.61E-87  |
| 170211-14 | <i>Dasyurus viverrinus</i>  | Eastern quoll   | Y        | Y         | Eastern quoll   | 100       | 2.61E-87  |
| 100111-04 | <i>Felis catus</i>          | Feral cat       | Y        | Y         | Feral cat       | 100       | 1.54E-79  |
| 120111-10 | <i>Felis catus</i>          | Feral cat       | Y        | Y         | Feral cat       | 100       | 1.56E-79  |
| 120111-12 | <i>Felis catus</i>          | Feral cat       | Y        | Y         | Feral cat       | 100       | 1.58E-79  |
| 120111-31 | <i>Felis catus</i>          | Feral cat       | Y        | <b>N</b>  | <b>NA</b>       | <b>NA</b> | <b>NA</b> |
| 170211-13 | <i>Felis catus</i>          | Feral cat       | Y        | Y         | Feral cat       | 99.2      | 3.36E-60  |
| 170211-21 | <i>Felis catus</i>          | Feral cat       | Y        | Y         | Feral cat       | 100       | 1.61E-79  |
| 170211-22 | <i>Felis catus</i>          | Feral cat       | Y        | Y         | Feral cat       | 100       | 1.55E-79  |
| 041110-42 | <i>Sarcophilus harrisii</i> | Tasmanian devil | Y        | Y         | Tasmanian devil | 100       | 4.02E-80  |
| 041110-47 | <i>Sarcophilus harrisii</i> | Tasmanian devil | Y        | Y         | Tasmanian devil | 100       | 9.34E-87  |
| 041110-48 | <i>Sarcophilus harrisii</i> | Tasmanian devil | Y        | Y         | Tasmanian devil | 100       | 2.61E-87  |
| 041110-53 | <i>Sarcophilus harrisii</i> | Tasmanian devil | Y        | Y         | Tasmanian devil | 100       | 2.47E-82  |
| 041110-59 | <i>Sarcophilus harrisii</i> | Tasmanian devil | Y        | Y         | Tasmanian devil | 100       | 7.32E-88  |
| 121010-06 | <i>Sarcophilus harrisii</i> | Tasmanian devil | Y        | Y         | Tasmanian devil | 100       | 4.02E-80  |
| 121010-22 | <i>Sarcophilus harrisii</i> | Tasmanian devil | Y        | Y         | Tasmanian devil | 99.4      | 5.58E-84  |
| 200910-24 | <i>Sarcophilus harrisii</i> | Tasmanian devil | Y        | Y         | Tasmanian devil | 100       | 9.34E-87  |
| 200910-25 | <i>Sarcophilus harrisii</i> | Tasmanian devil | Y        | Y         | Tasmanian devil | 100       | 2.61E-87  |
| 080211-04 | <i>Vulpes vulpes</i>        | Red fox         | Y        | Y         | Red fox         | 99.4      | 1.22E-85  |
| 080211-05 | <i>Vulpes vulpes</i>        | Red fox         | Y        | Y         | Red fox         | 99.4      | 5.54E-84  |
| 080211-06 | <i>Vulpes vulpes</i>        | Red fox         | Y        | <b>N</b>  | <b>NA</b>       | <b>NA</b> | <b>NA</b> |
| 080211-07 | <i>Vulpes vulpes</i>        | Red fox         | Y        | Y         | Red fox         | 97.2      | 9.35E-61  |
| 080211-08 | <i>Vulpes vulpes</i>        | Red fox         | Y        | Y         | Red fox         | 99.4      | 5.54E-84  |
| 080211-09 | <i>Vulpes vulpes</i>        | Red fox         | <b>N</b> | <b>NA</b> | <b>NA</b>       | <b>NA</b> | <b>NA</b> |
| 080211-10 | <i>Vulpes vulpes</i>        | Red fox         | Y        | Y         | Red fox         | 100       | 6.52E-78  |
| 080211-11 | <i>Vulpes vulpes</i>        | Red fox         | Y        | Y         | Red fox         | 98.9      | 5.66E-84  |

15  
16  
17  
18  
19  
20  
21  
22  
23  
24  
25  
26  
27  
28  
29  
30  
31  
32  
33  
34  
35  
36  
37  
38  
39  
40  
41  
42  
43  
44  
45  
46  
47  
48  
49  
50  
51  
52  
53  
54  
55  
56  
57  
58  
59  
60  
61  
62  
63  
64  
65

|           |                      |         |          |           |           |           |           |
|-----------|----------------------|---------|----------|-----------|-----------|-----------|-----------|
| 080211-12 | <i>Vulpes vulpes</i> | Red fox | Y        | <b>N</b>  | <b>NA</b> | <b>NA</b> | <b>NA</b> |
| 080211-13 | <i>Vulpes vulpes</i> | Red fox | Y        | Y         | Red fox   | 98.8      | 3.99E-75  |
| 080211-14 | <i>Vulpes vulpes</i> | Red fox | Y        | Y         | Red fox   | 100       | 6.52E-78  |
| 080211-15 | <i>Vulpes vulpes</i> | Red fox | Y        | Y         | Red fox   | 99.1      | 2.63E-50  |
| 080211-16 | <i>Vulpes vulpes</i> | Red fox | Y        | Y         | Red fox   | 100       | 6.52E-78  |
| 080211-17 | <i>Vulpes vulpes</i> | Red fox | <b>N</b> | <b>NA</b> | <b>NA</b> | <b>NA</b> | <b>NA</b> |
| 080211-18 | <i>Vulpes vulpes</i> | Red fox | Y        | Y         | Red fox   | 97.8      | 1.23E-80  |

781 <sup>α</sup> % ID is the percentage pairwise identity between the query sequence and the matching sequence identified using BLAST.

782 <sup>β</sup> The e-value represents the number of BLAST hits expected by chance. The lower the e-value is, the better.

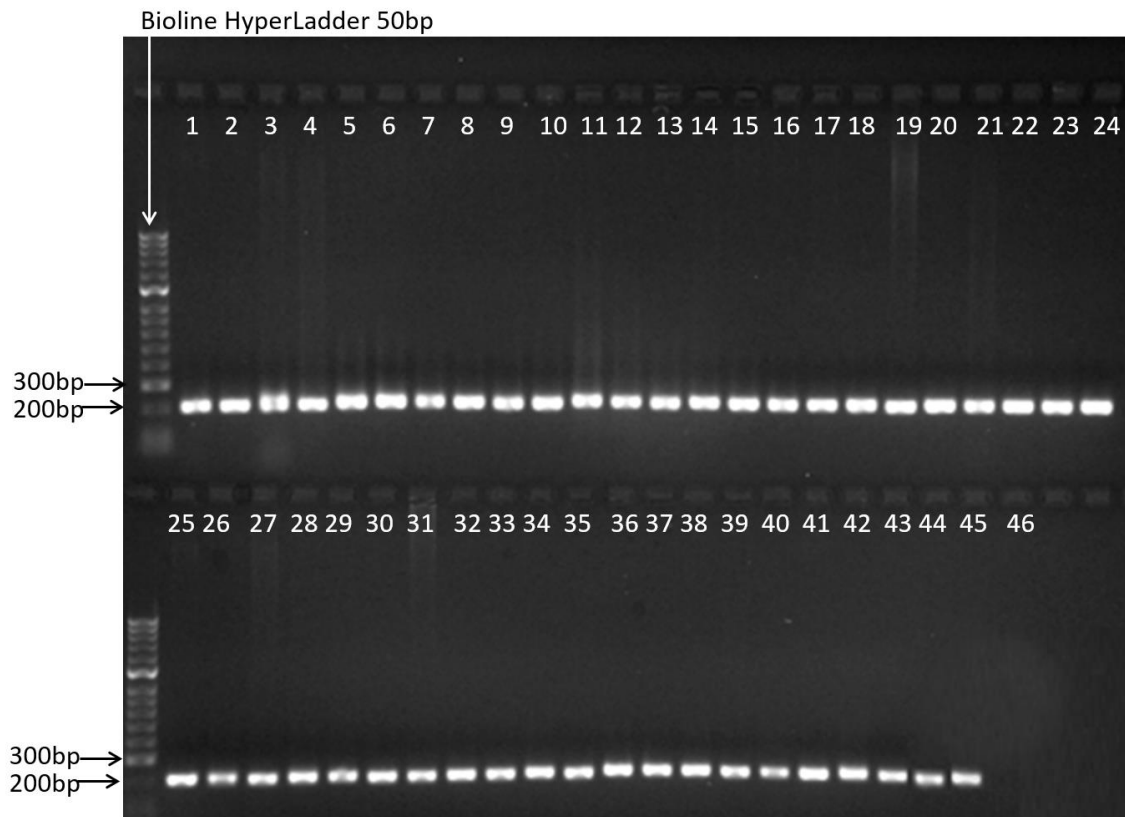

Figure 1: Gel showing amplification success from 45 known tissue samples representing 40 species, using the *AusPreda\_12S* mini-barcode primers developed in this study, and a PCR negative. The expected amplicon size is 218bp. Samples are grouped by species as follows: lanes 1 and 2: *Felis catus*, 3: *Canis lupus familiaris*, 4: *Canis lupus dingo*, 5 and 6: *Dasyurus viverrinus*, 7 and 8: *Dasyurus maculatus*, 9 and 10: *Vulpes vulpes*, 11 and 12: *Sarcophilus harrisii*, 13: *Oryctolagus cuniculus*, 14: *Lepus capensis*, 15: *Bos Taurus*, 16: *Ornithorhyncus anatinus*, 17: *Trichosorus vulpecula*, 18: *Petaurus breviceps*, 19: *Tachyglossus aculeatus*, 20: *Potorous tridactylus*, 21: *Bettongia gaimardi*, 22: *Dactylopsila trivirgata*, 23: *Burramys parvus*, 24: *Macropus rufogriseus*, 25: *Thylogale billardierii*, 26: *Pseudomys gracilicaudatus*, 27: *Pseudocheirus peregrinus*, 28: *Antechinus minimus*, 29: *Tiliqua nigrolutea*, 30: *Vombatus ursinus*, 31: *Isoodon obesulus*, 32: *Macropus giganteus*, 33: *Parameles gunnii*, 34: *Sminthopsis leucopus*, 35: *Mus musculus*, 36: *Planigale gilesi*, 37: *Rattus lutreolus velutinus*, 38: *Phascogale tapoatafa*, 39: *Hydromys chrysogaster*, 40: *Macropus rufus*, 41: *Vicugna pacos*, 42: *Dasyurus hallucatus*, 43: *Lathamus discolour*, 44: *Geocrinia laevis*, 45: *Dasyurus geoffroii*, 46: PCR negative.

## a) Window size: 175 bp

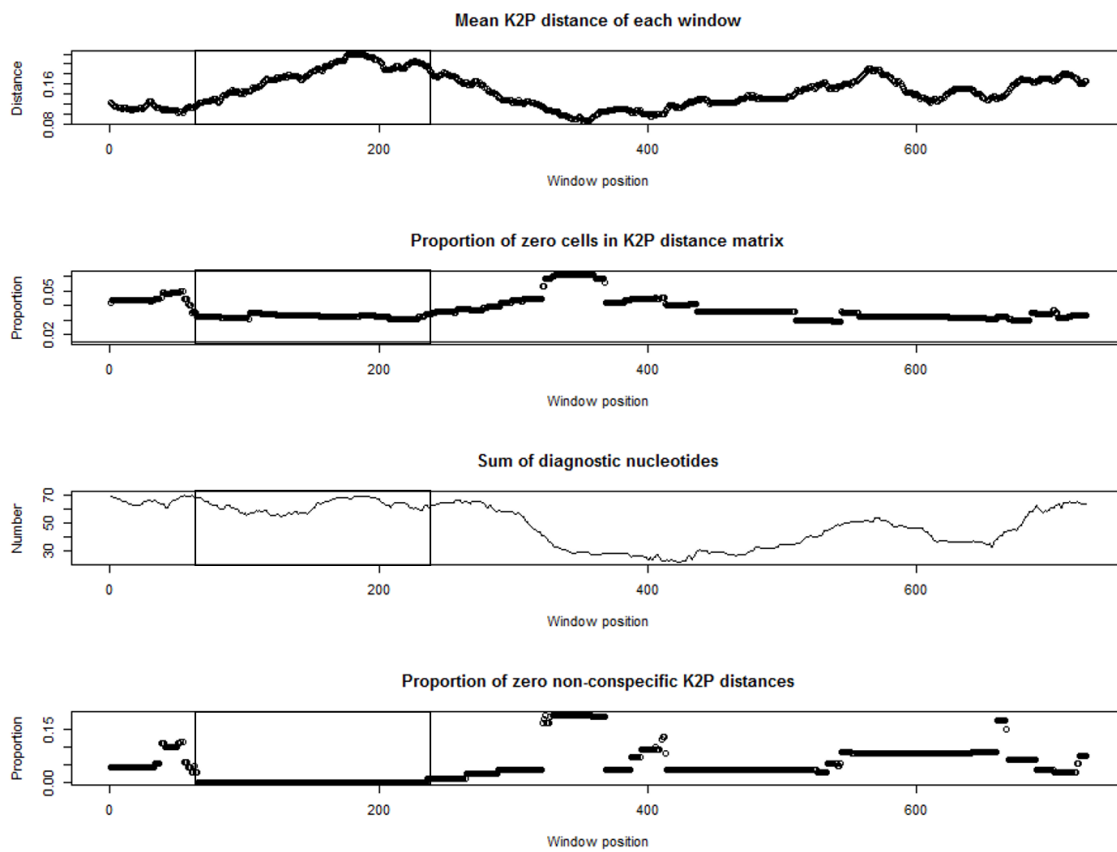

## b) Window size: 20 bp

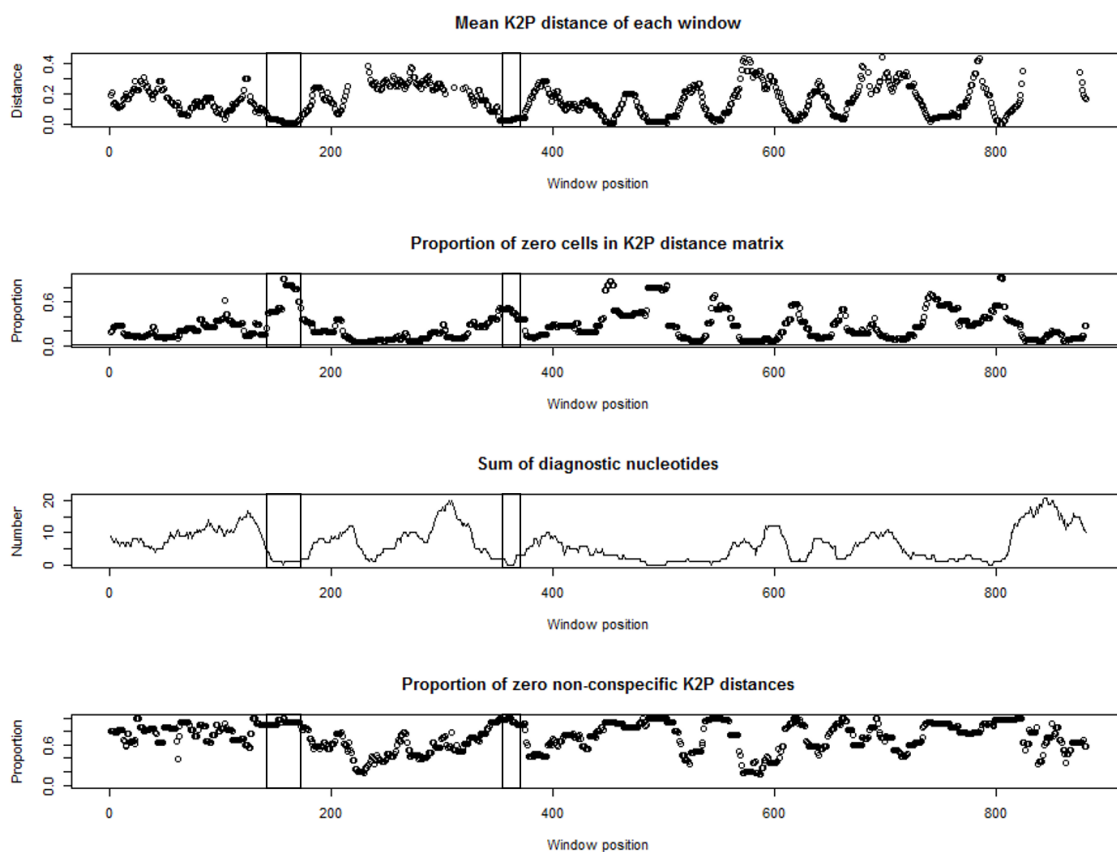

Figure 2: Results of the sliding window analysis conducted using the R package SPIDER for the 12S rRNA gene using window sizes of a) 175 bp and b) 20 bp to identify candidate mini-barcode regions and conserved primer sites respectively. For all panels, the x axes represent the position of each window within the sequence alignment, with each data point marking the position of the first nucleotide of one window. The first (top) panels display the mean K2P distances (a measure of genetic differentiation among species, where a value of zero means that sequences are identical) calculated for each window, with K2P values represented on the y-axes. The second panels represent the proportion of zero cells in the K2P distance matrix. A high proportion of inter-specific genetic distances that are equal to zero indicates sequences that are highly conserved among species. The third panels display the number of nucleotides that are diagnostic among species within each window. The fourth (lowest) panels indicate the proportion of zero non-conspecific K2P distances within each window. When this value is 0, it indicates that the sequence region has high potential to discriminate among species. The area boxed within each panel denotes a) the regions containing the first bases where a mini-barcode of *ca* 175 bp can be developed and b) the regions containing the first bases where conserved primer sites can be developed.

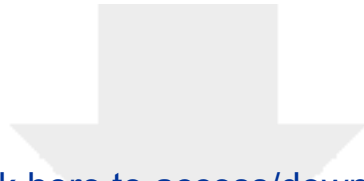

[Click here to access/download](#)

**Supplementary Material**

[Additional\\_file\\_1\\_12S\\_Database\\_sequences.fasta](#)

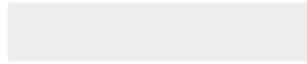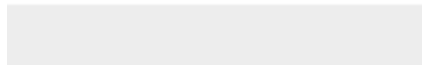

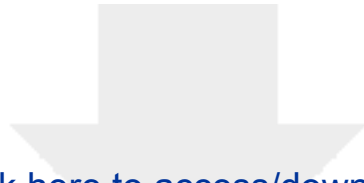

[Click here to access/download](#)

**Supplementary Material**

[Additional\\_file\\_2\\_12S\\_Database\\_samples.csv](#)

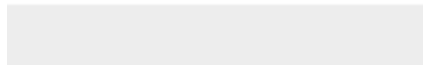

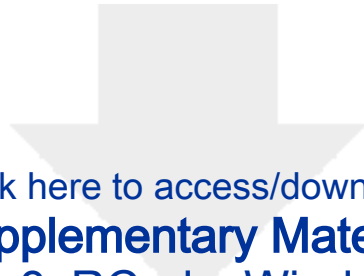

[Click here to access/download](#)

**Supplementary Material**

[Additional\\_file\\_3\\_RCode\\_Window\\_analysis.txt](#)

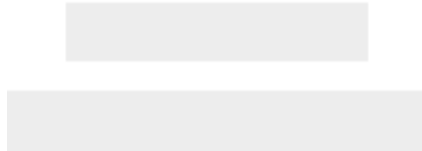





[Click here to access/download](#)

**Supplementary Material**

[Additional\\_file\\_4\\_FULL\\_Database.fasta](#)



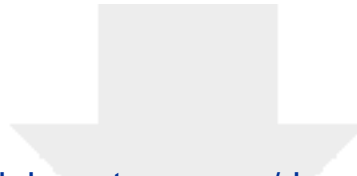

[Click here to access/download](#)

**Supplementary Material**

[Additional\\_file\\_5\\_UNIQUE\\_Database.fasta](#)

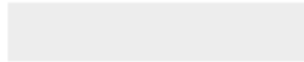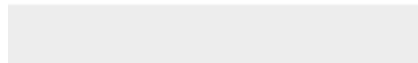

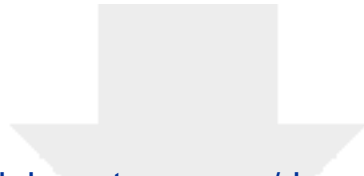

Click here to access/download  
**Supplementary Material**  
Additional\_file\_6\_RCode\_Tests.txt

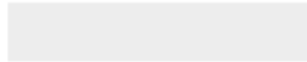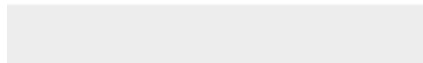



Click here to access/download

**Supplementary Material**

[Additional\\_file\\_7\\_GeneticDistanceEvaluation\\_Results.cs](#)

v



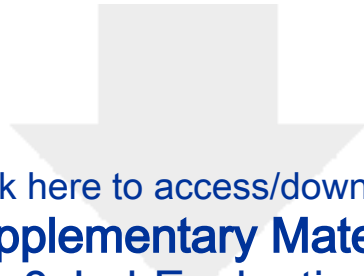

[Click here to access/download](#)

**Supplementary Material**

[Additional\\_file\\_8\\_LabEvaluation\\_Samples.csv](#)



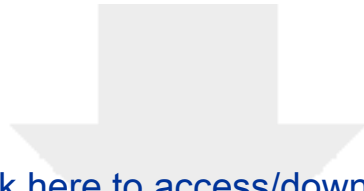

[Click here to access/download](#)

**Supplementary Material**

[Additional\\_file\\_9\\_KnownScat\\_sequences.fasta](#)



Supplement: gix052_giga-d-17-00051_revision-1.pdf [file gix052_giga-d-17-00051_revision-1.pdf]
