# Supplementary material for: A single mini-barcode test to screen for Australian mammalian predators from environmental samples
Source: PubMed Central journal article supplement (PMC5545080; doi:10.1093/gigascience/gix052), 2017-07-04
Supplement: gix052_reviewer-2-report-(revision-1).pdf [file gix052_reviewer-2-report-%28revision-1%29.pdf]

## **Reviewer Report**

**Title:** A single mini-barcode test to screen for Australian mammalian predators from environmental samples

**Version:** Revision 1      **Date:** 15 Jun 2017

**Reviewer name:** Stephane Boyer

### **Reviewer Comments to Author:**

I think that the authors have provided thorough responses to every point raised by the reviewers. I believe their amendments are satisfactory. Please note that my comment about using the localMinima function on their UNIQUE dataset was wrong, I meant the FULL dataset of course. The authors have tested both and chose to follow the correct option. I have no further comments and would like to recommend that the manuscript is accepted for publication in GigaScience.

### **Methods**

Are the methods appropriate to the aims of the study, are they well described, and are necessary controls included? Yes

### **Conclusions**

Are the conclusions adequately supported by the data shown? Yes

### **Reporting Standards**

Does the manuscript adhere to the journal's guidelines on [minimum standards of reporting?](#) Yes

### **Statistics**

Are you able to assess all statistics in the manuscript, including the appropriateness of statistical tests used? Yes, and I have assessed the statistics in my report.

### **Quality of Written English**

Please indicate the quality of language in the manuscript: Acceptable

### **Declaration of Competing Interests**

Please complete a declaration of competing interests, considering the following questions:

- Have you in the past five years received reimbursements, fees, funding, or salary from an organisation that may in any way gain or lose financially from the publication of this manuscript, either now or in the future?

- Do you hold any stocks or shares in an organisation that may in any way gain or lose financially from the publication of this manuscript, either now or in the future?
- Do you hold or are you currently applying for any patents relating to the content of the manuscript?
- Have you received reimbursements, fees, funding, or salary from an organization that holds or has applied for patents relating to the content of the manuscript?
- Do you have any other financial competing interests?
- Do you have any non-financial competing interests in relation to this paper?

If you can answer no to all of the above, write 'I declare that I have no competing interests' below. If your reply is yes to any, please give details below.

I declare that I have no competing interests

I agree to the open peer review policy of the journal. I understand that my name will be included on my report to the authors and, if the manuscript is accepted for publication, my named report including any attachments I upload will be posted on the website along with the authors' responses. I agree for my report to be made available under an Open Access Creative Commons CC-BY license (<http://creativecommons.org/licenses/by/4.0/>). I understand that any comments which I do not wish to be included in my named report can be included as confidential comments to the editors, which will not be published.

I agree to the open peer review policy of the journal

To further support our reviewers, we have joined with Publons, where you can gain additional credit to further highlight your hard work (see: <https://publons.com/journal/530/gigascience>). On publication of this paper, your review will be automatically added to Publons, you can then choose whether or not to claim your Publons credit. I understand this statement.

Yes
